# Supplementary material for: Decisional needs assessment of patients with complex care needs in primary care: a participatory systematic mixed studies review protocol
Source: PubMed Central journal article supplement — BMJ Open. 2017 Nov 12;7(11):e016400. doi: 10.1136/bmjopen-2017-016400 (PMC5695438; doi:10.1136/bmjopen-2017-016400), 2017-11-12
Supplement: bmjopen-2017-016400.draft_revisions.pdf [file bmjopen-2017-016400.draft_revisions.pdf]

# BMJ Open

BMJ Open is committed to open peer review. As part of this commitment we make the peer review history of every article we publish publicly available.

When an article is published we post the peer reviewers' comments and the authors' responses online. We also post the versions of the paper that were used during peer review. These are the versions that the peer review comments apply to.

The versions of the paper that follow are the versions that were submitted during the peer review process. They are not the versions of record or the final published versions. They should not be cited or distributed as the published version of this manuscript.

BMJ Open is an open access journal and the full, final, typeset and author-corrected version of record of the manuscript is available on our site with no access controls, subscription charges or pay-per-view fees (<http://bmjopen.bmj.com>).

If you have any questions on BMJ Open's open peer review process please email [editorial.bmjopen@bmj.com](mailto:editorial.bmjopen@bmj.com)

# BMJ Open

## Toward an interprofessional shared decision making support tool for primary care patients with complex care needs: a participatory systematic mixed studies review protocol

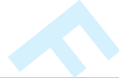

|                               |                                                                                                                                                                                                                                                                                                                                                                                                                                                                                                                                                                                                                                                                                                                                                                                                                                                                                                                                                                                                                                                                                                                                                                                                                                                                                                                                                                                                                                                                                                                                                                                                                                                                                                                                                                                                                                                                                                                                                                                                                                                                                                                                                                                                                                                                                                                                                        |
|-------------------------------|--------------------------------------------------------------------------------------------------------------------------------------------------------------------------------------------------------------------------------------------------------------------------------------------------------------------------------------------------------------------------------------------------------------------------------------------------------------------------------------------------------------------------------------------------------------------------------------------------------------------------------------------------------------------------------------------------------------------------------------------------------------------------------------------------------------------------------------------------------------------------------------------------------------------------------------------------------------------------------------------------------------------------------------------------------------------------------------------------------------------------------------------------------------------------------------------------------------------------------------------------------------------------------------------------------------------------------------------------------------------------------------------------------------------------------------------------------------------------------------------------------------------------------------------------------------------------------------------------------------------------------------------------------------------------------------------------------------------------------------------------------------------------------------------------------------------------------------------------------------------------------------------------------------------------------------------------------------------------------------------------------------------------------------------------------------------------------------------------------------------------------------------------------------------------------------------------------------------------------------------------------------------------------------------------------------------------------------------------------|
| Journal:                      | <i>BMJ Open</i>                                                                                                                                                                                                                                                                                                                                                                                                                                                                                                                                                                                                                                                                                                                                                                                                                                                                                                                                                                                                                                                                                                                                                                                                                                                                                                                                                                                                                                                                                                                                                                                                                                                                                                                                                                                                                                                                                                                                                                                                                                                                                                                                                                                                                                                                                                                                        |
| Manuscript ID                 | bmjopen-2017-016400                                                                                                                                                                                                                                                                                                                                                                                                                                                                                                                                                                                                                                                                                                                                                                                                                                                                                                                                                                                                                                                                                                                                                                                                                                                                                                                                                                                                                                                                                                                                                                                                                                                                                                                                                                                                                                                                                                                                                                                                                                                                                                                                                                                                                                                                                                                                    |
| Article Type:                 | Protocol                                                                                                                                                                                                                                                                                                                                                                                                                                                                                                                                                                                                                                                                                                                                                                                                                                                                                                                                                                                                                                                                                                                                                                                                                                                                                                                                                                                                                                                                                                                                                                                                                                                                                                                                                                                                                                                                                                                                                                                                                                                                                                                                                                                                                                                                                                                                               |
| Date Submitted by the Author: | 17-Feb-2017                                                                                                                                                                                                                                                                                                                                                                                                                                                                                                                                                                                                                                                                                                                                                                                                                                                                                                                                                                                                                                                                                                                                                                                                                                                                                                                                                                                                                                                                                                                                                                                                                                                                                                                                                                                                                                                                                                                                                                                                                                                                                                                                                                                                                                                                                                                                            |
| Complete List of Authors:     | <p>Bujold, Mathieu; McGill University, Department of Family Medicine<br/> Pluye, Pierre; McGill University, Department of Family Medicine<br/> Legare, France; Université Laval, Department of Family Medicine and<br/> Emergency Medicine<br/> Haggerty, Jeannie; McGill University, Department of Family Medicine<br/> Gore, Genevieve C.; McGill University, McGill Library<br/> El Sherif, Reem; McGill University, Department of Family Medicine<br/> Poitras, Marie-Eve; Université Laval, Department of Family Medicine and<br/> Emergency Medicine<br/> Beaulieu, Marie-Claude; Université de Sherbrooke, Department of Family<br/> Medicine<br/> Beaulieu, Marie-Dominique; Université de Montréal, Family and Emergency<br/> Medicine<br/> Bush, Paula; McGill University, Department of Family Medicine<br/> Couturier, Yves; Université de Sherbrooke, École de travail social<br/> Debarges, Beatrice; Beatitude Patient engagement in research<br/> Gagnon, Justin; McGill University, Department of Family Medicine<br/> Giguère, Anik; Université Laval, Department of Family Medicine and<br/> Emergency Medicine<br/> Grad, Roland; McGill University, Department of Family Medicine<br/> Granikov, Vera; McGill University, Department of Family Medicine<br/> Goulet, Serge; Université de Sherbrooke, Department of Family Medicine<br/> Hudon, Catherine; Université de Sherbrooke, Department of Family<br/> Medicine<br/> Kremer, Bernardo; Jewish General Hospital<br/> Kroger, Edeltraut; Université Laval, Faculty of Pharmacy<br/> Kudrina, Irina; McGill University, Department of Family Medicine<br/> Lebouche, Bertrand; McGill University, Department of Family Medicine<br/> Loignon, Christine; Université de Sherbrooke, Department of Family<br/> Medicine<br/> Lussier, Marie-Therese; Université de Montréal, Family and Emergency<br/> Medicine<br/> Martello, Cristiano; McGill University, Department of Family Medicine<br/> Nguyen, Quynh; McGill University, Department of Family Medicine<br/> Pratt, R; University of Minnesota<br/> Rihoux, Benoit; Université catholique de Louvain, Centre de Science<br/> Politique et de Politique Comparée<br/> Rosenberg, Ellen; McGill University, Department of Family Medicine<br/> Samson, Isabelle; Université Laval, Department of Family Medicine and</p> |

|                                 |                                                                                                                                                                                                                                                                                                                                                                                                                                                                                                                                                     |
|---------------------------------|-----------------------------------------------------------------------------------------------------------------------------------------------------------------------------------------------------------------------------------------------------------------------------------------------------------------------------------------------------------------------------------------------------------------------------------------------------------------------------------------------------------------------------------------------------|
|                                 | Emergency Medicine<br>Senn, Nicolas; Lausanne University Hospital, Department of Ambulatory Care and Community Medicine<br>Li Tang, David; McGill University, Department of Family Medicine<br>Tsujiimoto, Masashi; Japan National Center for Geriatrics & Gerontology<br>Vedel, Isabelle; McGill University, Department of Family Medicine<br>Ventelou, Bruno; Aix Marseille Université , School of Economics - SESSTIM UMR 912, Inserm IRD<br>Wensing, Michel; Heidelberg University, Department of General Practice and Health Services Research |
| <b>Primary Subject Heading</b>: | Health services research                                                                                                                                                                                                                                                                                                                                                                                                                                                                                                                            |
| Secondary Subject Heading:      | Patient-centred medicine                                                                                                                                                                                                                                                                                                                                                                                                                                                                                                                            |
| Keywords:                       | Patients with complex care needs, Shared decision making, Interprofessional care, PRIMARY CARE                                                                                                                                                                                                                                                                                                                                                                                                                                                      |
|                                 |                                                                                                                                                                                                                                                                                                                                                                                                                                                                                                                                                     |

SCHOLARONE™  
Manuscripts

1  
2  
3  
4  
5  
6  
7  
8  
9  
10  
11  
12  
13

## Toward an interprofessional shared decision making support tool for primary care patients with complex care needs: a participatory systematic mixed studies review protocol

14  
15  
16  
17  
18  
19  
20  
21  
22  
23  
24  
25  
26  
27  
28  
29  
30  
31  
32  
33  
34  
35  
36  
37  
38  
39  
40  
41  
42  
43  
44  
45  
46  
47  
48  
49  
50  
51  
52  
53  
54  
55  
56  
57  
58  
59  
60

Authors: Mathieu Bujold<sup>1</sup>, Pierre Pluye<sup>1</sup>, France Légaré<sup>2</sup>, Jeannie Haggerty<sup>1</sup>, Genevieve C. Gore<sup>3</sup>, Reem El Sherif<sup>1</sup>, Marie-Eve Poitras<sup>2</sup>, and the participatory review team\*

**Participatory review team** (co-researchers, knowledge users, collaborators and international experts): Beaulieu, M-C.<sup>4</sup>, Beaulieu, M-D.<sup>5</sup>, Bush, P.L.<sup>1</sup>, Couturier, Y.<sup>6</sup>, Débarges, B.<sup>7</sup>, Gagnon, J.<sup>1</sup>, Giguère, A.<sup>2</sup>, Grad, R.<sup>1</sup>, Granikov, V.<sup>1</sup>, Goulet, S.<sup>4</sup>, Hudon, C.<sup>4</sup>, Kremer, B.<sup>8</sup>, Kröger, E.<sup>9</sup>, Kudrina, I.<sup>1</sup>, Lebouché, B.<sup>1</sup>, Loignon, C.<sup>4</sup>, Lussier, M-T.<sup>5</sup>, Martello, C.<sup>1</sup>, Nguyen, Q.<sup>1</sup>, Pratt, R.<sup>10</sup>, Rihoux, B.<sup>11</sup>, Rosenberg, E.<sup>1</sup>, Samson, I.<sup>2</sup>, Senn N.<sup>12</sup>, Tang, D.<sup>1</sup>, Tsujimoto, M.<sup>13</sup>, Vedel, I.<sup>1</sup>, Ventelou, B.<sup>14</sup>, Wensing, M.<sup>15</sup>

### Affiliations

1 Department of Family Medicine, McGill University, Montreal, Canada

2 Department of Family Medicine and Emergency Medicine, Université Laval, Quebec, Canada

3 McGill Library, McGill University, Montreal, Canada

4 Department of Family Medicine, Université de Sherbrooke, Canada

5 Family and Emergency Medicine, Université de Montréal, Canada

6 École de travail social, Université de Sherbrooke, Canada

7 Beatitude Patient engagement in research, Sherbrooke, Canada

8 Jewish General Hospital, Montreal, Canada

9 Faculty of Pharmacy, Université Laval, Québec, Canada

10 Department of Family Medicine and Community Health, University of Minnesota, Minneapolis, United States

11 Centre de Science Politique et de Politique Comparée, Université catholique de Louvain, Belgique

12 Université de Lausanne, Switzerland

13 Japan National Center for Geriatrics & Gerontology, Obu City, Japan

14 Université d'Aix-Marseille, France

15 Department of General Practice and Health Services Research, Heidelberg University, Germany

### Corresponding author

Mathieu Bujold, PhD, MA, MSc

Post-doctoral researcher, Quebec SPOR SUPPORT Unit

Department of Family Medicine, McGill University

5858 Cote-des-Neiges, 3rd Floor, Suite 300, Montreal, QC, H3S 1Z1

[mathieu.bujold@mcgill.ca](mailto:mathieu.bujold@mcgill.ca)

### Abstract

#### INTRODUCTION

Patients with complex care needs suffer from combinations of multiple chronic conditions, mental health problems, drug interactions and social vulnerability, which can lead to health care services overuse, underuse or misuse. Typically, these patients, their families, their caregivers, and their practitioners (hereafter stakeholders), face interprofessional and patient-practitioner interactional issues related to stakeholders' personal uncertainty regarding possible options (decisional conflict). Gaps in knowledge, values clarification and social support in situations where options need to be deliberated (decisional needs) hamper effective decision support interventions. This review aims to: (a) identify decisional needs of patients with complex care needs, from the perspective of stakeholders; (b) build a taxonomy of these decisional needs; (c) prioritize decisional needs; and (d) design a decision support tool to help address stakeholders' decisional conflicts.

#### METHODS AND ANALYSIS

This theory-driven review will be based on the Interprofessional Shared Decision Making (IP-SDM) model and the Ottawa Decision Support Framework. Applying a participatory research approach, we will identify potentially relevant studies through a comprehensive literature search; select relevant ones using eligibility criteria inspired from our previous scoping review on patients with complex care needs; appraise quality using the Mixed Methods Appraisal Tool; conduct a 3-step synthesis (sequential exploratory mixed methods design) to build taxonomy of key decisional needs; and design an IP-SDM decision support tool based on these results.

#### ETHICS AND DISSEMINATION

Our review will produce a working taxonomy of key decisional needs for primary care patients with complex care needs (ontological contribution), allowing our team to design an innovative

1  
2  
3 IP-SDM support tool for addressing decisional conflict of multiple stakeholders (practical  
4 contribution). We will be the first team to adapt the IP-SDM model for patients with complex  
5 care needs (theoretical contribution). Knowledge users will facilitate the implementation of the  
6 tool, and disseminate the results in the Canadian primary care network.  
7  
8  
9

10  
11  
12 **Trial registration number:** Our protocol is registered with PROSPERO (registration number  
13 CRD42015020558).  
14

### 15 16 17 **Strengths and limitations of this study** 18

- 19  
20
- 21 • Our review will clarify decisional needs of primary care patients with complex care needs to  
22 inform the design of an innovative support tool for addressing stakeholders' decisional  
23 conflict.  
24
  - 25 • This work will be conducted with a participatory research approach involving multiple  
26 stakeholders', including patients' perspectives.  
27
  - 28 • Large team governance can be an issue; thus, an executive task force will carry out the  
29 review.  
30
  - 31 • There is a two-way knowledge gap that our systematic review will help to fill: firstly, the  
32 majority of intervention studies address simple care needs rather than complex ones; and  
33 secondly, current systematic reviews typically focus on one condition and one homogeneous  
34 population.  
35
  - 36 • The studies heterogeneity challenge will be raised by using an innovative mixed methods  
37 design 3-step synthesis to build a taxonomy presenting various key decisional needs  
38 configuration.  
39  
40  
41  
42  
43  
44  
45  
46  
47  
48  
49  
50  
51  
52  
53  
54  
55  
56  
57  
58  
59  
60

## Introduction

### Rationale for the review

The concept of ‘patients with complex care needs’ refers to people who suffer from combinations of multiple chronic conditions, mental health issues, drug interactions, social vulnerability, and who are associated with health care services overuse, underuse or misuse<sup>1-3</sup>. However, this does not fully capture the complex care needs experience that encompasses individual (patient and practitioner), interpersonal (patient-practitioner or interprofessional), organizational (e.g., resources), and socio-cultural characteristics (e.g., values)<sup>2,4-6</sup>. Typically, patients with complex care needs, their families, their caregivers, and their practitioners (hereafter stakeholders), face interactional issues related to stakeholders’ personal uncertainty or disagreements regarding possible options (decisional conflict). Gaps in knowledge of situations where options need to be deliberated (decisional needs) hamper effective decision support interventions for these patients.

Team members contributed to a pilot project that sought to identify characteristics of patients with complex care needs and possible interventions<sup>7,8</sup>. A case series<sup>7</sup> and a scoping review<sup>8</sup> revealed that interprofessional coordination of care and lack of stakeholders’ agreement are two major issues affecting this population. Stakeholders’ experience decisional conflict usually associated with knowledge, expectations, personal values, social support and a variety of personal, socio-cultural and clinical characteristics. Three individual evaluation tools of complex care needs<sup>9-11</sup> and one study about patient preference in the context of multi-morbidity were identified<sup>12,13</sup>. In the literature, we found no specific decision support tool that can facilitate shared decision making between a patient with complex care needs, their families and caregivers, and a multidisciplinary team (health and social primary care services). Thus, our target population, patients with complex care needs, can benefit from an interprofessional shared decision making tool (decision support tool) that accounts for the knowledge, values and preferences of all stakeholders<sup>14</sup>.

### Interprofessional Shared Decision Making (IP-SDM) model

Shared Decision Making (SDM) is a process where one patient and one health professional work together to make a healthcare choice; it is essential for informed consent and patient centred care

1  
2  
3  
4  
5  
6  
7  
8  
9  
10  
11  
12  
13  
14  
15  
16  
17  
18  
19  
20  
21  
22  
23  
24  
25  
26  
27  
28  
29  
30  
31  
32  
33  
34  
35  
36  
37  
38  
39  
40  
41  
42  
43  
44  
45  
46  
47  
48  
49  
50  
51  
52  
53  
54  
55  
56  
57  
58  
59  
60

<sup>15 16</sup>. Decision aids are a type of decision support tool that fosters shared decision making. As defined by the IPDAS (International Patient Decision Aid Standards)<sup>17</sup> they support a 5-step iterative decision-making process: (a) help patients and professionals identify a decision point and its related options; (b) help them to exchange information about the benefits and limitations of each option; (c) help patients clarify and communicate personal values and preferences; (d) help patients deliberate with diverse professionals about options; and (e) help patients make an informed value-based decision. A Cochrane systematic review of 110 randomized controlled trials provides strong evidence for the effectiveness of SDM and decision support tools <sup>18-21</sup>. Such tools (a) improve decision quality (increase knowledge of options and reduce personal uncertainty and decisional regret); (b) improve patient engagement in healthcare; (c) decrease non-effective healthcare choices (reduce overuse of health services); and (d) have the potential to increase effective healthcare choices. Decision support tools are also effective interventions to improve interactions, patient satisfaction, self-care, and patient-reported outcomes <sup>20 22-27</sup>. In addition, SDM tools have the potential to reduce inequities in health <sup>28</sup>. Therefore, industrialised countries such as Australia<sup>29</sup>, UK<sup>30</sup> and USA<sup>31</sup> are currently implementing large SDM initiatives.

SDM is the most effective decision making process when careful deliberation is needed to address uncertainties inherent to evidence-based medicine, and to weigh the risks and benefits of patients' healthcare choices (based on their values and preferences). Many factors may influence the choices individuals make and the roles they attribute to others and to themselves in the context of interprofessional care <sup>32-35</sup>, which justifies framing this review with the Interprofessional Shared Decision Making (IP-SDM) model (Figure 1) <sup>36</sup>.

The Interprofessional Shared Decision Making (IP-SDM) model extends the SDM beyond the patient-health professional dyad to interprofessional (IP) teams<sup>36 37</sup>. In addition to its interprofessional component, this model proposes to include family members and potential caregiver in a patient-centered process. The IP-SDM also takes into account the environmental complexity in which the SDM takes place (socio-cultural norm, organizational routines, and institutional structure). This model is particularly relevant to help IP teams respond to decisional needs of patients with complex care needs as it helps the stakeholders reach informed value-based decisions <sup>36-38</sup>.



## Decisional needs assessment

A decisional need is usually derived from a needs assessment that addresses or focuses on situations where multiple options need to be deliberated. Assessing decisional needs is needed in order to elaborate effective decision support, even more so when an interprofessional team is required to provide decision support to a patient (e.g., IP-SDM tool). Decision support interventions address stakeholders' personal uncertainty (decisional conflict). Indeed, unmet decisional conflict affects the decision quality (e.g., uninformed, not congruent with values and unsupported socially). This in turn may affect behaviour (e.g., uptake and maintenance of the chosen option), lead to negative emotions (e.g., decision regret) and impact health care use (e.g., overuse, underuse and misuse). The Ottawa Decision Support Framework (ODSF) informs the conduct of the decisional needs assessment and thus the design of decision support tools (Figure 2)<sup>39</sup>.

The initial step in the IP-SDM tool development is a decisional needs assessment for primary care patients with complex care needs, which answers the following questions: What are the types of decisions stakeholders have to make? Which decisions are most frequent? Which decisions are the most difficult to make and why? What do the stakeholders need to better support regarding the interprofessional shared decision making process (e.g., information, values clarification, social support or else)? What is currently being done? What are the barriers and facilitators for applying this decision support? Several strategies could be mobilized to assess the stakeholders' decisional needs<sup>14 40</sup>. A systematic review is a good first step.

## Review question and objectives

Our overall review question is: What are, from the perspective of stakeholders, the key decisional needs of patients with complex care needs? In line with the Knowledge Translation (KT) cycle<sup>41</sup>, the purpose of our systematic review is to provide the needed groundwork to identify decisional needs of patients with complex care needs to inform the design of an IP-SDM decision support tool (KT tool). With a task force and a multidisciplinary team including patients, practitioners, researchers, and knowledge users in community-based primary health care, this review aims to:

- (1) Identify decisional needs of patients with complex care needs from the perspective of stakeholders;
- (2) Build a taxonomy of these decisional needs;
- (3) Prioritize decisional needs;

1  
2  
3 (4) Design a decision support tool (with a user-centered approach) to help reconcile stakeholders'  
4 decisional conflicts.  
5  
6  
7

## 8 9 **Methods**

10 This review will use a multipronged approach. First, we will conduct a theory-driven systematic  
11 mixed studies review (including qualitative, quantitative and mixed methods studies)<sup>42</sup>. Mixed  
12 studies reviews provide a rich and highly practical understanding of complex health issues<sup>43-48</sup>.  
13  
14 Second, we will use an organizational participatory research approach to determine key  
15 decisional needs. Finally, we will apply a user-centered design approach to elaborate the  
16 prototype of a first decision support tool for patient with complex care needs.  
17  
18  
19  
20  
21

22  
23 We will thus blend research with action using a number of iterative cycles, thereby producing  
24 knowledge that can inform healthcare practices<sup>49-52</sup>. It consists of doing research with patients  
25 and practitioners, rather than on them; it is a strategy for organizational change and practice  
26 improvement<sup>52-56</sup>. It also supports the idea of producing and designing decision support tools that  
27 respond to the needs and perspectives of the knowledge users rather than producing tools that  
28 they need to adapt to. Both approaches are complementary and suitable for this review as the  
29 pilot project emerged from practice. A multidisciplinary team mixing scientific and practical  
30 knowledge is necessary to achieve our objectives. Team members are knowledge users,  
31 researchers and collaborators with practical knowledge (practitioners and patient partners). Our  
32 knowledge users are the directors and the members (clinicians, patients and managers) of the four  
33 Quebec network of Practice Based Research Networks (PBRN)<sup>57</sup> and the Quebec SPOR  
34 SUPPORT Unit (SPOR standing for Strategy for Patient Oriented Research). Our end users are  
35 the patients, families, caregivers and practitioners. In partnership with knowledge users, we will  
36 systematically search, identify, select, appraise, and synthesize qualitative and quantitative  
37 evidence. An executive task force will lead the review and mobilize the participatory review team  
38 (knowledge users, co-researchers, patient experts, and international experts).  
39  
40  
41  
42  
43  
44  
45  
46  
47  
48  
49  
50  
51

## 52 53 **Information sources and search strategy**

54 Building on our previous work<sup>7,8</sup>, the concept map and the search strategy was written and tested  
55 in collaboration with specialized librarians. Based on the scoping review<sup>7</sup>, we anticipate  
56  
57  
58  
59  
60

1  
2  
3 retrieving about 4500 potentially relevant database records (authors, title, source, abstract) in  
4 MEDLINE (Ovid), Embase (Ovid), PsycINFO (Ovid), CINAHL (EBSCOhost) and Social  
5 Sciences Citation Index (SSCI). In addition, our librarians will provide guidance in searching the  
6 grey literature using Google Scholar, Conference Proceedings Citation Index-Science (CPCI-S)  
7 and specialized websites. After the selection stage, other potentially relevant records will be  
8 sought by tracking citations of included studies using Scopus, up to saturation (no additional  
9 studies found). Our team members and the first authors of included studies will be emailed to  
10 request additional records or bibliographies.  
11  
12  
13  
14  
15  
16  
17  
18

### 19 **Eligibility criteria and identification of potentially relevant studies**

20 Eligibility criteria will be inspired from the previous scoping reviews on patients with complex  
21 care needs<sup>8</sup> with a focus on interactional and decisional issues. A study will be included if it is a  
22 French, English, or Spanish language empirical study about:  
23  
24  
25

- 26 (1) Patients with complex care needs (population with at least one of the following  
27 characteristics: multiple chronic conditions; mental health issues; drug interactions; social  
28 vulnerability; or health care services overuse, underuse and misuse);  
29  
30
- 31 (2) Primary health care setting;  
32
- 33 (3) Interpersonal relationships (reciprocal interaction of two or more persons, e.g.,  
34 interprofessional, or professional-patient, patient-family or professional-family);  
35  
36
- 37 (4) Decisional needs (factors associated with stakeholders' decisional conflict and affecting the  
38 decision making process regarding situations where multiple options are possible).  
39  
40  
41

42 We expect to identify about 300 potentially relevant studies. We will use EndNote (reference  
43 management software) to remove duplicates and store records with indexing terms. For each  
44 record, two reviewers will independently assign codes according to our eligibility criteria using  
45 specialized software (DistillerSR). For each code, we will measure the agreement between  
46 reviewers (kappa)<sup>58 59</sup>. When reviewers disagree, the record will be included in the following  
47 selection process.  
48  
49  
50  
51  
52  
53  
54  
55  
56  
57  
58  
59  
60

### **Selection of relevant studies (coding full-text documents)**

We anticipate including 150 relevant studies as follows. The two reviewers will independently code each full text paper identified in the previous step. As with identification, inter-reviewer agreement will be measured. Disagreements that are not resolved easily will be referred to a third party<sup>60</sup>.

### **Critical appraisal of included studies**

Critical appraisal is a core component of systematic reviews<sup>41 60</sup>. It provides a rationale to break down the synthesis of included studies by level of quality. We will use the Mixed Methods Appraisal Tool (MMAT)<sup>44 61 62</sup>, a unique validated tool for critically appraising the quality of qualitative, quantitative and mixed methods studies in systematic mixed studies reviews<sup>63</sup>. Using the 2011 version of the MMAT<sup>64</sup> appraisal form and user-manual, two reviewers will independently appraise included studies. As with selection, inter-reviewer agreement will be measured, and disagreements resolved. In line with the GRADE system, results will be expressed using two categories, weak/conditional or strong (qualitative or quantitative or mixed) evidence.

### **Synthesis design**

Included studies will be described in a summary table<sup>60 63 65</sup>. Then, guided by a sequential mixed methods design<sup>42 48 66</sup>, we will conduct a 3-step synthesis.

Step 1: Objective 1 -Identify decisional needs from the perspectives of multiple stakeholders

For each included study, two reviewers will independently list decisional needs using a deductive/inductive qualitative thematic analysis with specialized software (NVivo 11)<sup>67-70</sup>. For each decisional need (e.g., goal setting), the facilitators (e.g., interpreter) and barriers (e.g., language) influencing the decision will be listed, including stakeholders' information needs (e.g., options list with their potential benefits and harms), values, preferences and sources of support.

Data extraction: A hybrid thematic analysis (deductive/inductive) will be used. All articles will be coded using predefined themes (codebook) derived from the IP-SDM model and the ODSF (framework for decisional needs assessment)<sup>40</sup>, as well as themes suggested by the data; thus, creating an inventory of decisional needs and their facilitators and barriers. A comparative

1  
2  
3 analysis will be conducted to explore similarities/differences between patients' and practitioners'  
4 perspectives. Consistency and rigor will be ensured via a process of combining interpretations  
5 and dialogues<sup>69 71</sup>. Executive task force team members will examine the inventory and written  
6 interpretations, and ask the reviewers to explain strengths and limitations of their interpretations  
7 (trustworthiness) and to suggest alternative interpretations.  
8  
9

10  
11  
12  
13  
14 Data synthesis: A summary table of the analysis will be made by systematically noting the  
15 following for all decisional needs: label, definition, patients' and practitioners' perspectives,  
16 facilitators that simplify patients' decisions, barriers that make decisions difficult with patients,  
17 key excerpts of articles broken down by decisional need (illustrative examples), and GRADE.  
18 The summary table will be posted on our review blog, and the team will provide feedback. Given  
19 the feedback, some of the decisional needs will be revised, and modifications will be discussed.  
20 Then, a harmonization of themes will be conducted<sup>72</sup>. For each term, the usage will be confirmed  
21 in reference to documents on decision making (distinguishing accurate from improper usage), and  
22 accurate usages will be adopted to avoid ambiguity.  
23  
24  
25  
26  
27  
28  
29

### 30 31 Step 2: Objective 2 – Build a taxonomy of decisional needs

32 The Configurational Comparative Method (CCM) is a case-based analysis useful for building  
33 taxonomies<sup>73 74</sup>. For this review, each included study will be a case. Using CCM, we will  
34 determine commonalities in the relationships between decisional needs, their facilitators and  
35 barriers. We will use CCM to test relationships between decision-related variables using Boolean  
36 algebra. CCM is appropriate for two reasons: the theory-driven approach and the heterogeneity of  
37 study designs.  
38  
39  
40  
41  
42  
43  
44

45 Data extraction: We will use a data extraction form to ensure a systematic process<sup>75</sup>. Then, we  
46 will conduct a quantitative content analysis<sup>76</sup>. The codebook will contain categories listed in  
47 step-one (deductive coding), and will be tested by two coders using a random sample of 10% of  
48 our cases (studies). For each case, the two coders will independently assign text excerpts to codes  
49 (variables and values). This will produce a table of raw data. Inter-coder agreement will be  
50 measured (kappa). Disagreements that are not resolved easily will be referred to a third party. For  
51 each code with less than substantial agreement (kappa<0.61)<sup>59</sup>, the codebook will be revised  
52  
53  
54  
55  
56  
57  
58  
59  
60

1  
2  
3 (label, definition and key extracts) and an additional random sample of cases (10%) will be  
4  
5 coded.

6  
7  
8  
9 Data synthesis: Data will be discussed by executive task force members, to produce a table of  
10 binary variables with cases in rows and variables in columns. Then, we will conduct the CCM<sup>73</sup>  
11<sup>74</sup>, group similar cases in sets, and produce a table of configurations of decisional needs (sets in  
12 rows, variables in columns). Results will be interpreted by going back and forth between  
13 configurations and cases. The configurations will allow us to ‘pose more focused questions’ on  
14 the cases<sup>74</sup>. Configurations of decisional needs and interpretations will be reviewed. The  
15 configurations of decisional needs will be posted on the blog, and feedback provided by the team.  
16 Discrepancies that are not resolved easily will be referred to a third party. The synthesis will  
17 produce a comprehensive taxonomy of decisional needs for primary care patients with complex  
18 care needs.  
19  
20  
21  
22  
23  
24  
25  
26  
27

### 28 Step 3: Objective 3 - Determine key decisional needs

29  
30 The taxonomy will be discussed in a half-day workshop with team members, and a penultimate  
31 taxonomy will be posted on the blog. Then, the importance of decisional needs (taxonomy  
32 elements) will be rated by the team with a blog-embedded web-questionnaire and a 5-item Likert  
33 scale (from ‘not important at all’ to ‘extremely important’). Discrepancies (e.g., a need with a  
34 variety of ratings from low to high importance) that are not resolved easily will be referred to a  
35 third party. This will produce a taxonomy of key decisional needs, facilitators and barriers.  
36 The taxonomy will be compared to the qualitative results of a provincial Demonstration Project  
37 of the Quebec SPOR SUPPORT Unit funded by CIHR (Canadian Institutes of Health Research),  
38 Quebec Ministry of Health and FRQS (Quebec Research Fund). The demonstration project,  
39 conducted by co-authors of this review, focuses on primary care patients with complex care  
40 needs. In this other project, semi-structured interviews and focus group will be done with  
41 patients/relatives, health/social professionals and decision makers to explore their perspectives of  
42 decisional needs of patients with complex care needs. The demonstration project and this  
43 systematic review will be done concurrently to validate emerging decisional needs. This will give  
44 a deeper and broader understanding to better inform the design of an IP-SDM decision support  
45 tool.  
46  
47  
48  
49  
50  
51  
52  
53  
54  
55  
56  
57  
58  
59  
60

#### **Objective 4 - Design an IP-SDM decision support tool**

In a second workshop, participants will determine how results can inform the design of an initial version (V1) of the proposed IP-SDM support tool. Note that given the difficulty in assembling all team members at the same time, this workshop will be held twice: once with local team members and once with international experts (online). Having designed V1 of the tool, we will proceed with its diffusion, dissemination and implementation.

Diffusion, our broadest strategy, will involve raising general awareness about our results and the tool through conference presentations and publications based on International Patient Decision Aid Standards (IPDAS)<sup>1</sup>. Dissemination, a more active and targeted strategy, will consist of reaching other Knowledge Users through websites, listservs, and peer networks through the Canadian primary care and SPOR networks. Implementation in clinical settings will be conducted within the Demonstration Project of the Quebec SPOR SUPPORT Unit. This project will begin in 2017, and consists of three sequential phases: the identification of profiles of these patients with complex care needs in administrative databases, an intervention in clinical settings and a pilot pragmatic trial. Our IP-SDM decision support tool will be a component of a case management intervention in the second phase; our review is, thus, timely. In this phase, an ecological content validation will be conducted in six clinical settings<sup>77</sup>. Practitioners, patients and caregivers will be asked to assess V1 (relevance, clarity and representativeness of its elements). Based on results, we will produce a modified version (V2). Then, using a web-application (app) version of V2, usability will be tested<sup>78 79</sup>. The app will be integrated in the case management intervention. After the demonstration project, the four Quebec PBRNs will be the primary settings targeted for scaling up the implementation of the tool. They include 49 clinics, including most of the Quebec family medicine teaching units (FMUs). These academic units include leaders from multiple professions who have the potential to influence practitioners in other primary care settings.

#### **Discussion and dissemination**

Patients with complex care needs are associated with unmet health care needs, overuse, underuse or misuse of health care services, low quality of care, and increased costs of health systems<sup>80-82</sup>.

---

<sup>1</sup> <http://www.ipdas.ohri.ca/>

1  
2  
3 Given the aging population and rising rates of chronic disease, the number of patients with  
4 complex care needs is growing <sup>3 83 84</sup>. This review and its ensuing tool has the potential to  
5 improve the quality of health care they receive.  
6  
7  
8  
9

10 This systematic review will identify decisional needs of patients with complex care needs from  
11 the perspective of stakeholders (substantive contribution). The result of our analysis will offer a  
12 working taxonomy of key decisional needs for primary care patients with complex care needs  
13 (ontological contribution). We will be the first team to adapt the IP-SDM model for patients with  
14 complex care needs (theoretical contribution). The taxonomy of key decisional needs will help to  
15 design an innovative IP-SDM support tool (practical contribution). This tool will frame  
16 stakeholders' decisional needs, help them understand options (e.g., watchful waiting) and  
17 patients' goals, and find the common ground crucial for improving patient-practitioner and  
18 interprofessional interactions, quality of decisions and care <sup>85</sup>.  
19  
20  
21  
22  
23  
24  
25  
26  
27

28 Our systematic review will contribute to bridge two knowledge gaps: on the one hand, the  
29 majority of intervention studies address simple care needs rather than complex ones; on the other  
30 hand, current systematic reviews typically focus on one condition and one homogeneous  
31 population <sup>86-90</sup>. The studies' heterogeneity challenge will be addressed by using an innovative  
32 mixed methods design 3-step synthesis to build a taxonomy presenting various key decisional  
33 needs' configurations.  
34  
35  
36  
37  
38  
39

40 Previous studies showed that patients with complex care needs are typically facing interactional  
41 issues, which justifies framing this proposal within the IP-SDM model. Strong evidence shows  
42 that SDM support tools improve patient-practitioner interactions and decision quality, and reduce  
43 ineffective care <sup>20 91-93</sup>. However, we know of no decision support tool that could facilitate shared  
44 decision making between patients with complex care needs and multiple professionals. The  
45 unique contribution of our review will be to enhance decision support for these patients.  
46  
47  
48  
49  
50  
51

52  
53 As with all systematic reviews, due to publication bias, our work will be biased toward positive  
54 results. This limitation will be reduced by validating the results with the knowledge users and the  
55 qualitative results of a provincial Demonstration Project of the Quebec SPOR SUPPORT Unit  
56  
57  
58  
59  
60



(semi-structured interviews and focus group will be done with patients with complex care needs, relatives, health/social professionals and decision makers to explore their perspectives of decisional needs of patients with complex care needs).

This review emerged from two Quebec PBRNs' pilot work, addresses an important issue for stakeholders and is a priority of the Quebec Ministry of Health<sup>94</sup>. In line with Canadian Institutes for Health Research (CIHR) priorities<sup>2</sup>, patient perspectives will be included in this review given our organizational participatory research and our user-centered design approaches. Results will be disseminated across Quebec PBRNs and the Canadian primary care network. The tool will be used in the Quebec-SPOR SUPPORT Unit's Demonstration Project. Our multidisciplinary team (family medicine, nursing, pharmacology, public health, psychology, and social work) is ideal for achieving our objectives, and for implementing the proposed tool in Quebec and disseminating it across Canada.

## SYSTEMATIC REVIEW STATUS

The review is currently in the protocol and search strategy updating phase. We are testing the search strategy in Ovid MEDLINE (2017/02/06). We expect to complete the selection of relevant studies in 2017 and design the first version of the IP-SDM support tool in 2018.

## ABBREVIATIONS

- CIHR : Canadian Institutes of Health Research
- FRQS: Fond de recherche du Québec – Santé
- IP-SDM: Interprofessional Shared Decision Making
- KT: Knowledge Translation
- ODSF: Ottawa Decision Support Framework
- PBRN: Practice Based Research Network
- SPOR: CIHR Strategy for Patient Oriented Research

---

<sup>2</sup> <http://www.cihr-irsc.gc.ca/e/193.html>

## KEY TERMS

- **KNOWLEDGE USERS:** The directors and the members (clinicians, patients, managers) of the four Quebec PBRNs and the Quebec SPOR SUPPORT Unit.
- **MULTIDISCIPLINARY TEAM:** Patients, practitioners, knowledge users and researchers.
- **PRIMARY CARE:** Community based primary health care.
- **STAKEHOLDERS:** Patients with complex care needs, families, caregivers and practitioners.

## ACKNOWLEDGEMENTS

The preparation of this protocol has been supported by the Quebec SPOR SUPPORT Unit. Pierre Pluye holds a salary award from the Fonds de recherche du Québec – Santé (FRQS). Authors gratefully acknowledge and the following collaborators: Magali Bigras and Alain Boulet, Centre de santé et de services sociaux de Gatineau, Canada ; Lynn R. McLauchlin, St. Mary's Hospital Center, Montreal, Canada; Silvia Duong, Jewish General Hospital, Montreal, Canada; and Fanny Hersson, Department of Family Medicine, McGill University, Canada). This protocol has been funded by the Canadian Institutes of Health Research (CIHR).

## AUTHOR CONTRIBUTIONS

PP, FL and MB conceived and designed the review with input from all team members. MB drafted the manuscript. All authors (MB, PP, FL, JH, GG, RES, MEP, BMC, BMD, BPL, CY, DB, GJ, GA, GR, GV, GS, HC, KB, KE, KI, LB, LC, LMT, MC, NQ, PR, RB, RE, SI, SN, TD, TM, VI, VB, WM) read, critically revised, and approved the final manuscript. Team members are (i) knowledge users (BMC, BMD, DB, JH, LMT, RE, SI), (ii) researchers (MB, PP, FL, GG, RES, MEP, BPL, CY, GA, GR, HC, KE, LB, LC, VI.), (iii) collaborators (GJ, GS, GV, KB, KI, MC, NQ, RB, TD) and (iv) international experts (PR, SN, TM, VB, WM).

## FUNDING STATEMENT

This work is funded by the Canadian Institutes for Health Research (CIHR) grant number 2016 30KRS-367087. CIHR had no role in the development of this protocol.

## COMPETING INTERESTS

The authors declare no competing interests.

**REFERENCES**

1. Grant RW, Ashburner JM, Hong CS, et al. Defining patient complexity from the primary care physician's perspective: A cohort study. *Ann Intern Med* 2011;155(12):797-804.
2. Schaink AK, Kuluski K, Lyons RF, et al. A scoping review and thematic classification of patient complexity: Offering a unifying framework. *Journal of Comorbidity* 2012;2(1):1-9.
3. Smith S, Soubhi H, Fortin M, et al. Managing patients with multimorbidity: systematic review of interventions in primary care and community settings. *BMJ* 2012; 345(e5205).
4. Loeb DF, Bayliss EA, Binswanger IA, et al. Primary care physician perceptions on caring for complex patients with medical and mental illness. *J Gen Intern Med* 2012;27(8):945-52.
5. Safford MM, Allison JJ, Kiefe CI. Patient complexity: More than comorbidity. The vector model of complexity. *J Gen Intern Med* 2007;22(Suppl 3):382-90.
6. Johnson DR, Ziersch AM, Burgess T. I don't think general practice should be the front line: Experiences of general practitioners working with refugees in South Australia. *Australia and New Zealand health policy* 2008;5.
7. Martello C, Bessière G, Bigras M, et al. What Do We Mean When We Say "This Patient is Complex"? . NAPCRG Annual Conference (North American Primary Care Research Group). New York, 2014.
8. Pluye P, Bessière G, Bigras M, et al. Characteristics of Complex Care Needs and Interventions Suited for Patients With Such Needs: A Participatory Scoping Review. NAPCRG Annual Conference (North American Primary Care Research Group). New York, 2014.
9. Laerum E, Steine S, Finset A. The Patient Perspective Survey (PPS): A new tool to improve consultation outcome and patient involvement in general practice patients with complex health problems. *Patient Educ Couns* 2004;52(2):201-07.
10. Peek CJ. Integrating care for persons, not only diseases. *J Clin Psychol Med Settings* 2009;16(1):13-20.
11. Stiefel FC, Huyse FJ, Söllner W, et al. Operationalizing integrated care on a clinical level: The INTERMED project. *Med Clin North Am* 2006;90(4):713-58.
12. Fried TR, Tinetti M, Agostini J, et al. Health outcome prioritization to elicit preferences of older persons with multiple health conditions. *Patient Educ Couns* 2011;83(2):278-82.
13. Mangin D, Stephen G, Bismah V, et al. Making patient values visible in healthcare: a systematic review of tools to assess patient treatment priorities and preferences in the context of multimorbidity. *BMJ Open* 2016;6(6):e010903.
14. St-Jacques S, Grenier S, Charland M, et al. Decisional needs assessment regarding Down syndrome prenatal testing: a systematic review of the perceptions of women, their partners and health professionals. *Prenat Diagn* 2008;28(13):1183-203.
15. Weston WW. Informed and shared decision-making: the crux of patient-centered care. *CMAJ* 2001;165(4):438-9.
16. Makoul G, Clayman ML. An integrative model of shared decision making in medical encounters. *Patient Educ Couns* 2006;60(3):301-12.

17. Volk RJ, Llewellyn-Thomas H, Stacey D, et al. Ten years of the International Patient Decision Aid Standards Collaboration: evolution of the core dimensions for assessing the quality of patient decision aids. *BMC Med Inform Decis Mak* 2013;13 Suppl 2:S1.
18. Legare F, Ratte S, Stacey D, et al. Interventions for improving the adoption of shared decision making by healthcare professionals. *Cochrane Database Syst Rev* 2010(5):CD006732.
19. Legare F, Stacey D, Turcotte S, et al. Interventions for improving the adoption of shared decision making by healthcare professionals. *Cochrane Database Syst Rev* 2014(9):CD006732.
20. Stacey D, Legare F, Col NF, et al. Decision aids for people facing health treatment or screening decisions. *Cochrane Database Syst Rev* 2014(1):CD001431.
21. Stacey D, Courtemanche C, Barry M, et al. Cochrane review of patient decision aids for treatment or screening decisions: Update in 2012 reveals 24 new trials for 110 total. 2013 International Shared Decision Making Conference. Lima, Peru., 2013.
22. Coleman K, Austin B, Brach C, et al. Evidence on the Chronic Care Model in the new millennium. *Health Affairs* 2009;28(1):75-85.
23. Legare F, Stacey D, Briere N, et al. Healthcare providers' intentions to engage in an interprofessional approach to shared decision-making in home care programs: a mixed methods study. *J Interprof Care* 2013;27(3):214-22.
24. Légaré F, Witteman H. Shared decision making: Examining key elements and barriers to adoption into routine clinical practice. *Health affairs (Project Hope)* 2013;32(2):276-84.
25. Hibbard J, Greene J. What the evidence shows about patient activation: better health outcomes and care experiences; fewer data on costs. *Health Affairs* 2013;32(2):207-14.
26. Legare F, Dodin S, Stacey D, et al. Patient decision aid on natural health products for menopausal symptoms: randomized controlled trial. *Menopause international* 2008;14(3):105-10.
27. Labrecque M, Paunescu C, Plesu I, et al. Evaluation of the effect of a patient decision aid about vasectomy on the decision-making process: a randomized trial. *Contraception* 2010;82(6):556-62.
28. Melbourne E, Roberts S, Durand MA, et al. Dyadic OPTION: Measuring perceptions of shared decision-making in practice. *Patient Educ Couns* 2011;83(1):55-7.
29. Shared Decision Making: Australian Commission on Safety and Quality in Health Care; 2017 [Available from: <https://www.safetyandquality.gov.au/our-work/shared-decision-making/> accessed 2 Feb 2017.
30. Shared Decision Making: National health service (NHS); 2016 [Available from: <http://sdm.rightcare.nhs.uk/> accessed 2 Feb 2017.
31. The SHARE Approach: Agency for Healthcare Research and Quality (AHRQ); 2016 [Available from: <https://www.ahrq.gov/professionals/education/curriculum-tools/shareddecisionmaking/index.html> accessed 2 Feb 2017.
32. Bujold M. Patient's representation of illness as an interdisciplinary communication channel [Article in French]. *Anthropologie et Sociétés* 2008;32( HS):18-25.
33. Bujold M. Le patient intégrateur: analyse de l'articulation d'une pluralité de voix / voies dans une clinique intégrative québécoise. Université Laval, 2011.

- 1
  - 2
  - 3
  - 4
  - 5
  - 6
  - 7
  - 8
  - 9
  - 10
  - 11
  - 12
  - 13
  - 14
  - 15
  - 16
  - 17
  - 18
  - 19
  - 20
  - 21
  - 22
  - 23
  - 24
  - 25
  - 26
  - 27
  - 28
  - 29
  - 30
  - 31
  - 32
  - 33
  - 34
  - 35
  - 36
  - 37
  - 38
  - 39
  - 40
  - 41
  - 42
  - 43
  - 44
  - 45
  - 46
  - 47
  - 48
  - 49
  - 50
  - 51
  - 52
  - 53
  - 54
  - 55
  - 56
  - 57
  - 58
  - 59
  - 60
34. Bujold M. Ethnomedical ethics with regard to patient plurivocality: between autonomy and heteronomy [Article in French]. *Journal International de Bioéthique* 2015;26(4):19-36.
35. Gaboury I, Bujold M, Boon H, et al. Interprofessional collaboration within Canadian integrative healthcare clinics: Key components. *Soc Sci Med* 2009;69(5):707-15.
36. Legare F, Stacey D, Pouliot S, et al. Interprofessionalism and shared decision-making in primary care: A stepwise approach towards a new model. *J Interprof Care* 2011;25(1):18-25.
37. Legare F, Stacey D, Graham ID, et al. Advancing theories, models and measurement for an interprofessional approach to shared decision making in primary care: a study protocol. *BMC Health Serv Res* 2008;8:2.
38. Muntinga ME, Hoogendijk EO, van Leeuwen KM, et al. Implementing the chronic care model for frail older adults in the Netherlands: study protocol of ACT (frail older adults: care in transition). *BMC Geriatr* 2012;12:19.
39. Légaré F, O'Connor A, Graham I, et al. Supporting patients facing difficult health care decisions: use of the Ottawa Decision Support Framework. *Canadian Family Physician* 2006;52(4):476-77.
40. Jacobsen MJ, O'Connor AM, Stacey D. Decisional Needs Assessment in Populations. A workbook for assessing patients' and practitioners' decision making needs. University of Ottawa 1999 [updated 2013] [Available from: [https://decisionaid.ohri.ca/docs/implement/Population\\_Needs.pdf](https://decisionaid.ohri.ca/docs/implement/Population_Needs.pdf) accessed Feb 2 2017].
41. Straus SE, Tetroe J, Graham I. Defining knowledge translation. *Canadian Medical Association Journal* 2009;181(3-4):165-68.
42. Pluye P, Hong QN. Combining the power of stories and the power of numbers: Mixed methods research and mixed studies reviews. *Annu Rev Public Health* 2014;35:29-45.
43. Grant M, Booth A. A typology of reviews: An analysis of 14 review types and associated methodologies. *Health Info Libr J* 2009;26(2):91-108.
44. Pluye P, Gagnon MP, Griffiths F, et al. A scoring system for appraising mixed methods research, and concomitantly appraising qualitative, quantitative and mixed methods primary studies in mixed studies reviews. *Int J Nurs Stud* 2009;46(4):529-46.
45. Pope C, Mays N, Popay J. Synthesizing qualitative and quantitative health evidence: A guide to methods. Berkshire: Open University Press 2007.
46. Sheldon TA. Making evidence synthesis more useful for management and policy-making. *J Health Serv Res Policy* 2005;10(3 Suppl. 1):1-5.
47. Pluye P, Hong Q, I. V. The plurality of review methods and synthesis methods: Opening-up the definition of systematic reviews [invited peer-reviewed paper on knowledge syntheses]. *J Clin Epi* In Press.
48. Hong QN, Pluye P, Bujold M, et al. Convergent and sequential synthesis designs: implications for conducting and reporting systematic reviews of qualitative and quantitative evidence. *Systematic Reviews* (Accepted).
49. What are the key processes associated to outcomes of participatory research with health organizations? A participatory systematic mixed studies review. NAPCRG annual meeting (North American Primary Care Research Group); 2013 Ottawa.

- 1  
2  
3  
4  
5  
6  
7  
8  
9  
10  
11  
12  
13  
14  
15  
16  
17  
18  
19  
20  
21  
22  
23  
24  
25  
26  
27  
28  
29  
30  
31  
32  
33  
34  
35  
36  
37  
38  
39  
40  
41  
42  
43  
44  
45  
46  
47  
48  
49  
50  
51  
52  
53  
54  
55  
56  
57  
58  
59  
60
50. Pluye P, Nadeau N, Lehoux P. Comment favoriser la recherche clinique en pédopsychiatrie? Une expérience de recherche-action collaborative. *Sante Mentale Quebec* 2001;26(12):245-66.
  51. Cargo M, Mercer S. The value and challenges of participatory research: Strengthening its practice. *Annu Rev Public Health* 2008;29(1):325-50.
  52. Waterman H, Tillen D, Dickson R, et al. Action Research: A systematic review and guidance for assessment. *Health Technol Assess* 2001;5(23):iii-157.
  53. Argyris C, Putnam R, Smith D. Action science : Concepts, methods, and skills for research and intervention. San Francisco, CA: Jossey-Bass 1985.
  54. Munn-Giddings C, McVicar A, Smith L. Systematic review of the uptake and design of action research in published nursing research, 2000-2005. *J Res Nurs* 2008;13(6):465-77.
  55. Munten G, Van Den Bogaard J, Cox K, et al. Implementation of evidence-based practice in nursing using action research: A review. *Worldviews Evid Based Nurs* 2010;7(3):135-57.
  56. Soh K, Davidson P, Leslie G, et al. Action research studies in the intensive care setting: A systematic review. *Int J Nurs Stud* 2011;48(2):258-68.
  57. Davis MM, Keller S, DeVoe J, et al. Characteristics and lessons learned from practice-based research networks (PBRNs) in the United States. *J Healthc Leadersh* 2012;2012(4):107-16.
  58. Garson DG. Reliability analysis. Statnotes: Topics in multivariate analysis. In: Garson DG, ed. Raleigh: North Carolina State University, 2010.
  59. Landis JR, Koch GG. The measurement of observer agreement for categorical data. *Biometrics* 1977;33(1):159-74.
  60. Higgins J, Green S. Cochrane handbook for systematic reviews of interventions Version 5.1.0 [updated March 2011]: The Cochrane Collaboration; 2011 [Available from: <http://www.cochrane-handbook.org> accessed Mar 1 2013.
  61. Pace R, Pluye P, Bartlett G, et al. Testing the reliability and efficiency of the pilot Mixed Methods Appraisal Tool (MMAT) for systematic mixed studies review. *Int J Nurs Stud* 2012;49(1):47-53.
  62. Souto RQ, Khanassov V, Hong QN, et al. Systematic mixed studies reviews: Updating results on the reliability and efficiency of the mixed methods appraisal tool. *International journal of nursing studies* 2015;52:500-01.
  63. Crowe M, Sheppard L. A review of critical appraisal tools show they lack rigor: Alternative tool structure is proposed. *J Clin Epidemiol* 2011;64(1):79-89.
  64. Pluye P, Robert E, Cargo M, et al. Proposal: A mixed methods appraisal tool for systematic mixed studies reviews Department of Family Medicine, McGill University, Montreal, Canada.2011 [Available from: <http://mixedmethodsappraisaltoolpublic.pbworks.com>. Archived by WebCite® at <http://www.webcitation.org/5tTRTc9y> accessed Feb 2 2017.
  65. Popay J, Roberts H, Sowden A, et al. Guidance on the conduct of narrative synthesis in systematic reviews: Final report. Swindon: ESRC Methods Programme 2006.
  66. Creswell J, Plano Clark V. Designing and conducting mixed methods research. Thousand Oaks: Sage 2010.
  67. Bazeley P, Jackson K. Qualitative Data Analysis with NVivo: Colorado and University of Colorado: SAGE Publications Ltd 2013.

- 1  
2  
3 68. Bujold M. Nvivo: a support tool for qualitative analysis. Workshop guide. Montreal,  
4 Canada: CAQI 2016.  
5  
6 69. Boyatzis RE. Transforming qualitative information: Thematic analysis and code  
7 development. Thousand Oaks: Sage 1998.  
8  
9 70. Fereday J, Muir-Cochrane E. Demonstrating rigor using thematic analysis: A hybrid  
10 approach of inductive and deductive coding and theme development. *Int J Qual*  
11 *Methods* 2006; 5(1).  
12  
13 71. Sullivan P. Qualitative data analysis using a dialogical approach. London: Sage 2012.  
14  
15 72. Pavel S, Nolet D. Handbook of terminology. Ottawa: Minister of Public Works and  
16 Government Services Canada, 2001.  
17  
18 73. Rihoux B, Marx A. QCA, 25 years after “The Comparative Method”: Mapping, challenges,  
19 and innovations. *Polit Res Q* 2013;66(1):167-235.  
20  
21 74. Rihoux B, Ragin C. Configurational comparative methods. Thousand Oaks: Sage 2009.  
22  
23 75. Cochrane Effective Practice and Organisation of Care Review Group. Data collection  
24 checklist Ottawa, Canada: Cochrane Effective Practice and Organisation of Care  
25 Review Group; 2002 [Available from:  
26 <http://epoc.cochrane.org/sites/epoc.cochrane.org/files/uploads/datacollectionchecklist.pdf>  
27 accessed Feb 10 2017].  
28  
29 76. Neuendorf KA. The content analysis guidebook. Thousand Oaks: Sage 2002.  
30  
31 77. Haynes SN, Richard DCS, Kubany ES. Content validity in psychological assessment: A  
32 functional approach to concepts and methods. *Psychol Assess* 1995;7(3):238-47.  
33  
34 78. Nielsen J. Usability engineering. Boston: Academic Press 1994.  
35  
36 79. Rubin J, Chisnell D. Handbook of usability testing: How to plan, design, and conduct  
37 effective tests 2nd ed. Indianapolis: Wiley 2008.  
38  
39 80. Rich E, Lipson D, Libersky J, et al. Coordinating care for adults with complex care needs  
40 in the patient-centered medical home: Challenges and solutions [White Paper].  
41 Rockville, MD: U.S. Department of Health and Human Services Agency for Healthcare  
42 Research and Quality; 2012 [updated 2012; cited 2013 Dec 12]. Available from:  
43 <http://pcmh.ahrq.gov/sites/default/files/attachments/Coordinating%20Care%20for%20Adults%20with%20Complex%20Care%20Needs.pdf>  
44 accessed Feb 10 2017.  
45  
46 81. Rich EC, Lipson D, Libersky J, et al. Organizing care for complex patients in the patient-  
47 centered medical home. *Ann Fam Med* 2012;10(1):60-62.  
48  
49 82. Schoen C, Osborn R, Squires D, et al. New 2011 survey of patients with complex care  
50 needs in 11 countries finds that care is often poorly coordinated. *Health Aff*  
51 2011;30(12):2437-48.  
52  
53 83. Hudon C, Chouinard M-C, Couture M, et al. Partners for the optimal organisation of the  
54 healthcare continuum for high users of health and social services: protocol of a  
55 developmental evaluation case study design. *BMJ open* 2014;4(12):e006991.  
56  
57 84. Katerndahl DA, Wood R, Jaen CR. A method for estimating relative complexity of  
58 ambulatory care. *Ann Fam Med* 2010;8(4):341-47.  
59  
60 85. Coiera E. When conversation is better than computation. *Journal of the American  
Medical Informatics Association* 2000;7(3):277-86.  
86. Beaulieu MD, Proulx M, Jobin G, et al. When is knowledge ripe for primary care? An  
exploratory study on the meaning of evidence. *Eval Health Prof* 2008;31(1):22-42.

- 1  
2  
3 87. de Bruin S, Versnel N, Lemmens L, et al. Comprehensive care programs for patients with  
4 multiple chronic conditions: A systematic literature review. *Health Policy*  
5 2012;107(2-3):108-45.  
6  
7 88. Kamerow D. How can we treat multiple chronic conditions? *BMJ* 2012;344(e1487).  
8  
9 89. Ouwens M, Wollersheim H, Hermens R, et al. Integrated care programmes for  
10 chronically ill patients: A review of systematic reviews. *Int J Qual Health Care*  
11 2005;17(2):141-46.  
12  
13 90. Upshur R, Tracy C. Chronicity and complexity: Facing the challenges of chronic disease  
14 in primary care. *Can Fam Physician* 2008;54(12):1655-8.  
15  
16 91. Shi L. The impact of primary care: A focused review. *Scientifica* 2012;2012.  
17  
18 92. Starfield B, Shi L, Macinko J. Contribution of primary care to health systems and health.  
19 *Milbank Q* 2005;83(3):457-502.  
20  
21 93. Stacey D, Légaré F, Col N, et al. Decision aids for people facing health treatment or  
22 screening decisions. *The Cochrane Library* 2014.  
23  
24 94. Ministère de la santé et des services sociaux du Québec. Plan stratégique 2015-2020:  
25 Québec: Gouvernement du Québec; 2015 [Available from:  
26 <http://publications.msss.gouv.qc.ca/msss/fichiers/2015/15-717-02W.pdf> accessed  
27 10 Feb 2017.  
28  
29  
30  
31  
32  
33  
34  
35  
36  
37  
38  
39  
40  
41  
42  
43  
44  
45  
46  
47  
48  
49  
50  
51  
52  
53  
54  
55  
56  
57  
58  
59  
60



1  
2  
3  
4  
5  
6  
7  
8  
9  
10  
11  
12  
13  
14  
15  
16  
17  
18  
19  
20  
21  
22  
23  
24  
25  
26  
27  
28  
29  
30  
31  
32  
33  
34  
35  
36  
37  
38  
39  
40  
41  
42  
43  
44  
45  
46  
47  
48  
49  
50  
51  
52  
53  
54  
55  
56  
57  
58  
59  
60

FIGURES

Figure 1. The InterProfessional Shared Decision Making (IP-SDM) model

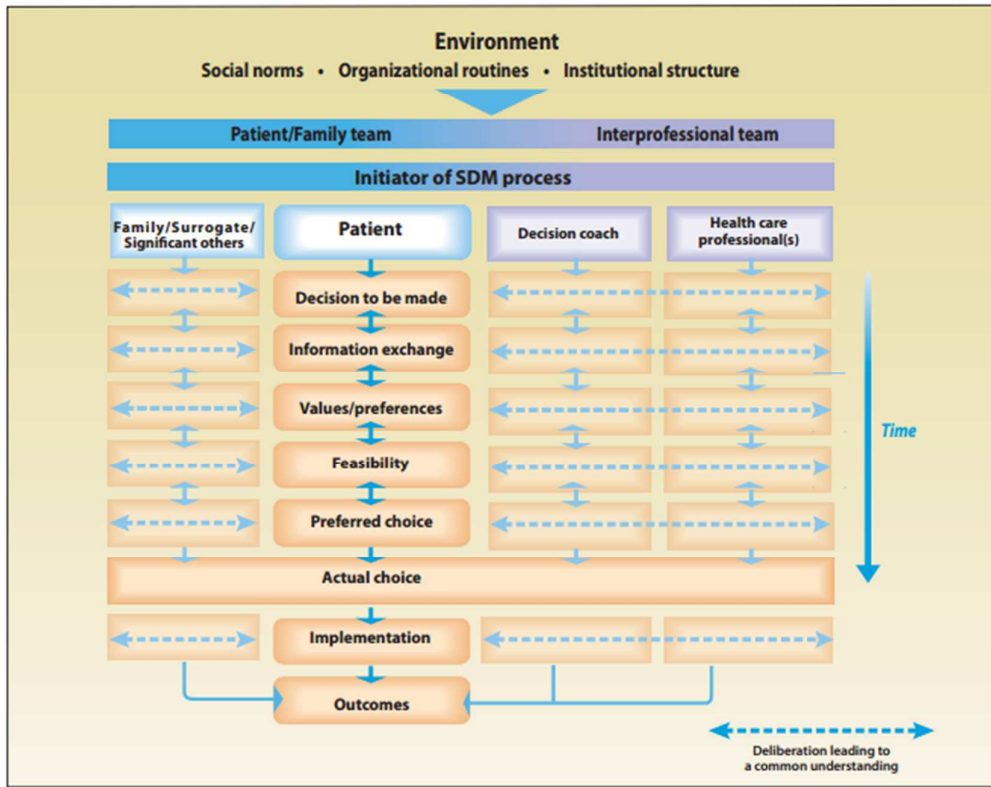

© Légaré F, Stacey D, and IP Team, 2010. Available from [www.ohri.ca/decisionaid](http://www.ohri.ca/decisionaid).

Review only

Figure 2. The Ottawa Decision Support Framework (ODSF)

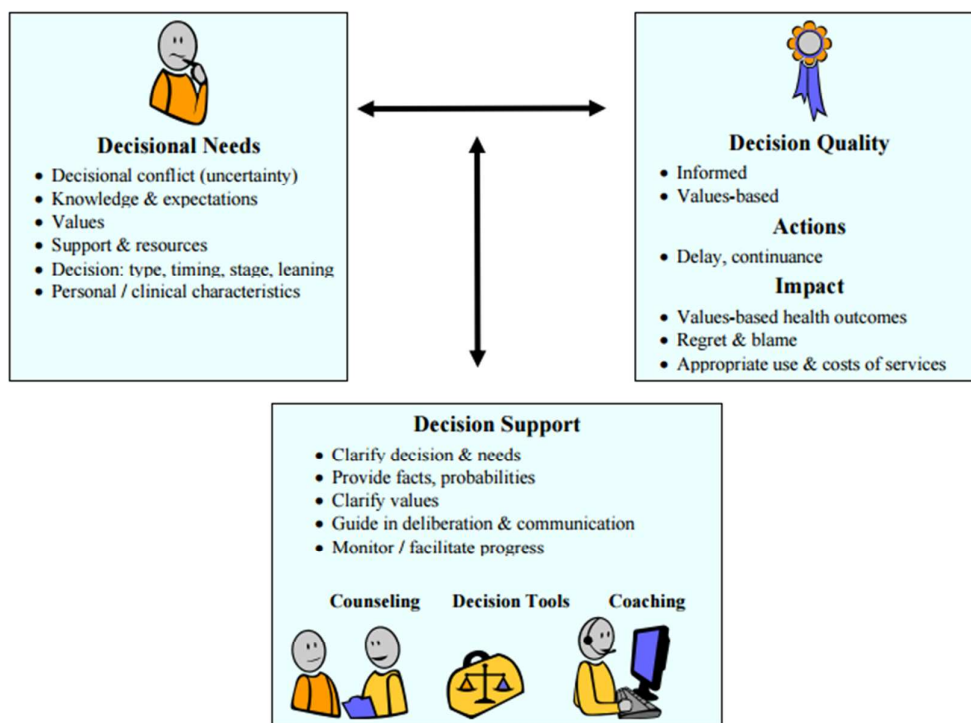

AM O'Connor, Ottawa Decision Support Framework to Address Decisional Conflict.  
 © 2006. Available from <https://decisionaid.ohri.ca/docs/develop/ODSF.pdf>

1  
2  
3  
4  
5  
6  
7  
8  
9  
10  
11  
12  
13  
14  
15  
16  
17  
18  
19  
20  
21  
22  
23  
24  
25  
26  
27  
28  
29  
30  
31  
32  
33  
34  
35  
36  
37  
38  
39  
40  
41  
42  
43  
44  
45  
46  
47  
48  
49

| Section and topic                 | Item No | Checklist item - <a href="http://www.bmj.com/content/349/bmj.g7647">http://www.bmj.com/content/349/bmj.g7647</a>                                                                                | Check |
|-----------------------------------|---------|-------------------------------------------------------------------------------------------------------------------------------------------------------------------------------------------------|-------|
| <b>Administrative information</b> |         |                                                                                                                                                                                                 |       |
| Title:                            |         |                                                                                                                                                                                                 |       |
| Identification                    | 1a      | Identify the report as a protocol of a systematic review                                                                                                                                        | ✓     |
| Update                            | 1b      | If the protocol is for an update of a previous systematic review, identify as such                                                                                                              | ✓     |
| Registration                      | 2       | If registered, provide the name of the registry (such as PROSPERO) and registration number                                                                                                      | ✓     |
| Authors:                          |         |                                                                                                                                                                                                 |       |
| Contact                           | 3a      | Provide name, institutional affiliation, e-mail address of all protocol authors; provide physical mailing address of corresponding author                                                       | ✓     |
| Contributions                     | 3b      | Describe contributions of protocol authors and identify the guarantor of the review                                                                                                             | ✓     |
| Amendments                        | 4       | If the protocol represents an amendment of a previously completed or published protocol, identify as such and list changes; otherwise, state plan for documenting important protocol amendments | ✓     |
| Support:                          |         |                                                                                                                                                                                                 |       |
| Sources                           | 5a      | Indicate sources of financial or other support for the review                                                                                                                                   | ✓     |
| Sponsor                           | 5b      | Provide name for the review funder and/or sponsor                                                                                                                                               | ✓     |
| Role of sponsor or funder         | 5c      | Describe roles of funder(s), sponsor(s), and/or institution(s), if any, in developing the protocol                                                                                              | ✓     |
| <b>Introduction</b>               |         |                                                                                                                                                                                                 |       |
| Rationale                         | 6       | Describe the rationale for the review in the context of what is already known                                                                                                                   | ✓     |
| Objectives                        | 7       | Provide an explicit statement of the question(s) the review will address with reference to participants, interventions, comparators, and outcomes (PICO)                                        | ✓     |

**Methods**

|    |                                    |     |                                                                                                                                                                                                                               |   |
|----|------------------------------------|-----|-------------------------------------------------------------------------------------------------------------------------------------------------------------------------------------------------------------------------------|---|
| 1  |                                    |     |                                                                                                                                                                                                                               |   |
| 2  |                                    |     |                                                                                                                                                                                                                               |   |
| 3  |                                    |     |                                                                                                                                                                                                                               |   |
| 4  |                                    |     |                                                                                                                                                                                                                               |   |
| 5  |                                    |     |                                                                                                                                                                                                                               |   |
| 6  | <b>Methods</b>                     |     |                                                                                                                                                                                                                               |   |
| 7  | Eligibility criteria               | 8   | Specify the study characteristics (such as PICO, study design, setting, time frame) and report characteristics (such as years considered, language, publication status) to be used as criteria for eligibility for the review | ✓ |
| 8  |                                    |     |                                                                                                                                                                                                                               |   |
| 9  |                                    |     |                                                                                                                                                                                                                               |   |
| 10 |                                    |     |                                                                                                                                                                                                                               |   |
| 11 | Information sources                | 9   | Describe all intended information sources (such as electronic databases, contact with study authors, trial registers or other grey literature sources) with planned dates of coverage                                         | ✓ |
| 12 |                                    |     |                                                                                                                                                                                                                               |   |
| 13 |                                    |     |                                                                                                                                                                                                                               |   |
| 14 | Search strategy                    | 10  | Present draft of search strategy to be used for at least one electronic database, including planned limits, such that it could be repeated                                                                                    | ✓ |
| 15 |                                    |     |                                                                                                                                                                                                                               |   |
| 16 |                                    |     |                                                                                                                                                                                                                               |   |
| 17 | Study records:                     |     |                                                                                                                                                                                                                               |   |
| 18 | Data management                    | 11a | Describe the mechanism(s) that will be used to manage records and data throughout the review                                                                                                                                  | ✓ |
| 19 |                                    |     |                                                                                                                                                                                                                               |   |
| 20 | Selection process                  | 11b | State the process that will be used for selecting studies (such as two independent reviewers) through each phase of the review (that is, screening, eligibility and inclusion in meta-analysis)                               | ✓ |
| 21 |                                    |     |                                                                                                                                                                                                                               |   |
| 22 |                                    |     |                                                                                                                                                                                                                               |   |
| 23 | Data collection process            | 11c | Describe planned method of extracting data from reports (such as piloting forms, done independently, in duplicate), any processes for obtaining and confirming data from investigators                                        | ✓ |
| 24 |                                    |     |                                                                                                                                                                                                                               |   |
| 25 |                                    |     |                                                                                                                                                                                                                               |   |
| 26 |                                    |     |                                                                                                                                                                                                                               |   |
| 27 | Data items                         | 12  | List and define all variables for which data will be sought (such as PICO items, funding sources), any pre-planned data assumptions and simplifications                                                                       | ✓ |
| 28 |                                    |     |                                                                                                                                                                                                                               |   |
| 29 |                                    |     |                                                                                                                                                                                                                               |   |
| 30 |                                    |     |                                                                                                                                                                                                                               |   |
| 31 | Outcomes and prioritization        | 13  | List and define all outcomes for which data will be sought, including prioritization of main and additional outcomes, with rationale                                                                                          | ✓ |
| 32 |                                    |     |                                                                                                                                                                                                                               |   |
| 33 | Risk of bias in individual studies | 14  | Describe anticipated methods for assessing risk of bias of individual studies, including whether this will be done at the outcome or study level, or both; state how this information will be used in data synthesis          | ✓ |
| 34 |                                    |     |                                                                                                                                                                                                                               |   |
| 35 |                                    |     |                                                                                                                                                                                                                               |   |
| 36 |                                    |     |                                                                                                                                                                                                                               |   |
| 37 |                                    |     |                                                                                                                                                                                                                               |   |
| 38 | Data synthesis                     | 15a | Describe criteria under which study data will be quantitatively synthesised                                                                                                                                                   | ✓ |
| 39 |                                    |     |                                                                                                                                                                                                                               |   |
| 40 |                                    |     |                                                                                                                                                                                                                               |   |
| 41 |                                    |     |                                                                                                                                                                                                                               |   |
| 42 |                                    |     |                                                                                                                                                                                                                               |   |
| 43 |                                    |     |                                                                                                                                                                                                                               |   |
| 44 |                                    |     |                                                                                                                                                                                                                               |   |
| 45 |                                    |     |                                                                                                                                                                                                                               |   |
| 46 |                                    |     |                                                                                                                                                                                                                               |   |
| 47 |                                    |     |                                                                                                                                                                                                                               |   |
| 48 |                                    |     |                                                                                                                                                                                                                               |   |
| 49 |                                    |     |                                                                                                                                                                                                                               |   |

1  
2  
3  
4  
5  
6  
7  
8  
9  
10  
11  
12  
13  
14  
15  
16  
17  
18  
19  
20  
21  
22  
23  
24  
25  
26  
27  
28  
29  
30  
31  
32  
33  
34  
35  
36  
37  
38  
39  
40  
41  
42  
43  
44  
45  
46  
47  
48  
49

|                                   |     |                                                                                                                                                                                                                                                  |   |
|-----------------------------------|-----|--------------------------------------------------------------------------------------------------------------------------------------------------------------------------------------------------------------------------------------------------|---|
|                                   | 15b | If data are appropriate for quantitative synthesis, describe planned summary measures, methods of handling data and methods of combining data from studies, including any planned exploration of consistency (such as $I^2$ , Kendall's $\tau$ ) | ✓ |
|                                   | 15c | Describe any proposed additional analyses (such as sensitivity or subgroup analyses, meta-regression)                                                                                                                                            |   |
|                                   | 15d | If quantitative synthesis is not appropriate, describe the type of summary planned                                                                                                                                                               |   |
| Meta-bias(es)                     | 16  | Specify any planned assessment of meta-bias(es) (such as publication bias across studies, selective reporting within studies)                                                                                                                    | ✓ |
| Confidence in cumulative evidence | 17  | Describe how the strength of the body of evidence will be assessed (such as GRADE)                                                                                                                                                               | ✓ |

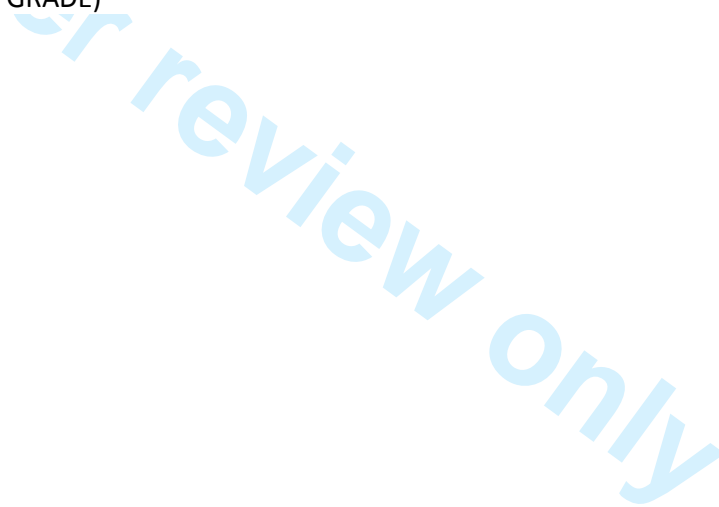

# BMJ Open

## Decisional needs assessment of patients with complex care needs in primary care: a participatory systematic mixed studies review protocol

|                               |                                                                                                                                                                                                                                                                                                                                                                                                                                                                                                                                                                                                                                                                                                                                                                                                                                                                                                                                                                                                                                                                                                                                                                                                                                                                                                                                                                                                                                                                                                                                                                                                                                                                                                                                                                                                                                                                                                                                                                                                                                                                                                                                                                                                                                                                                                                                                                                                                                                                                                                                                                                                                                                                                                        |
|-------------------------------|--------------------------------------------------------------------------------------------------------------------------------------------------------------------------------------------------------------------------------------------------------------------------------------------------------------------------------------------------------------------------------------------------------------------------------------------------------------------------------------------------------------------------------------------------------------------------------------------------------------------------------------------------------------------------------------------------------------------------------------------------------------------------------------------------------------------------------------------------------------------------------------------------------------------------------------------------------------------------------------------------------------------------------------------------------------------------------------------------------------------------------------------------------------------------------------------------------------------------------------------------------------------------------------------------------------------------------------------------------------------------------------------------------------------------------------------------------------------------------------------------------------------------------------------------------------------------------------------------------------------------------------------------------------------------------------------------------------------------------------------------------------------------------------------------------------------------------------------------------------------------------------------------------------------------------------------------------------------------------------------------------------------------------------------------------------------------------------------------------------------------------------------------------------------------------------------------------------------------------------------------------------------------------------------------------------------------------------------------------------------------------------------------------------------------------------------------------------------------------------------------------------------------------------------------------------------------------------------------------------------------------------------------------------------------------------------------------|
| Journal:                      | <i>BMJ Open</i>                                                                                                                                                                                                                                                                                                                                                                                                                                                                                                                                                                                                                                                                                                                                                                                                                                                                                                                                                                                                                                                                                                                                                                                                                                                                                                                                                                                                                                                                                                                                                                                                                                                                                                                                                                                                                                                                                                                                                                                                                                                                                                                                                                                                                                                                                                                                                                                                                                                                                                                                                                                                                                                                                        |
| Manuscript ID                 | bmjopen-2017-016400.R1                                                                                                                                                                                                                                                                                                                                                                                                                                                                                                                                                                                                                                                                                                                                                                                                                                                                                                                                                                                                                                                                                                                                                                                                                                                                                                                                                                                                                                                                                                                                                                                                                                                                                                                                                                                                                                                                                                                                                                                                                                                                                                                                                                                                                                                                                                                                                                                                                                                                                                                                                                                                                                                                                 |
| Article Type:                 | Protocol                                                                                                                                                                                                                                                                                                                                                                                                                                                                                                                                                                                                                                                                                                                                                                                                                                                                                                                                                                                                                                                                                                                                                                                                                                                                                                                                                                                                                                                                                                                                                                                                                                                                                                                                                                                                                                                                                                                                                                                                                                                                                                                                                                                                                                                                                                                                                                                                                                                                                                                                                                                                                                                                                               |
| Date Submitted by the Author: | 28-Jun-2017                                                                                                                                                                                                                                                                                                                                                                                                                                                                                                                                                                                                                                                                                                                                                                                                                                                                                                                                                                                                                                                                                                                                                                                                                                                                                                                                                                                                                                                                                                                                                                                                                                                                                                                                                                                                                                                                                                                                                                                                                                                                                                                                                                                                                                                                                                                                                                                                                                                                                                                                                                                                                                                                                            |
| Complete List of Authors:     | <p>Bujold, Mathieu; McGill University, Department of Family Medicine<br/>         Pluye, Pierre; McGill University, Department of Family Medicine<br/>         Legare, France; Université Laval, Department of Family Medicine and<br/>         Emergency Medicine<br/>         Haggerty, Jeannie; McGill University, Department of Family Medicine<br/>         Gore, Genevieve C.; McGill University, McGill Library<br/>         El Sherif, Reem; McGill University, Department of Family Medicine<br/>         Poitras, Marie-Eve; Université Laval, Department of Family Medicine and<br/>         Emergency Medicine<br/>         Beaulieu, Marie-Claude; Université de Sherbrooke, Department of Family<br/>         Medicine<br/>         Beaulieu, Marie-Dominique; Université de Montréal, Family and Emergency<br/>         Medicine<br/>         Bush, Paula; McGill University, Department of Family Medicine<br/>         Couturier, Yves; Université de Sherbrooke, École de travail social<br/>         Debarges, Beatrice; Beatitude Patient engagement in research<br/>         Gagnon, Justin; McGill University, Department of Family Medicine<br/>         Giguère, Anik; Université Laval, Department of Family Medicine and<br/>         Emergency Medicine<br/>         Grad, Roland; McGill University, Department of Family Medicine<br/>         Granikov, Vera; McGill University, Department of Family Medicine<br/>         Goulet, Serge; Université de Sherbrooke, Department of Family Medicine<br/>         Hudon, Catherine; Université de Sherbrooke, Department of Family<br/>         Medicine<br/>         Kremer, Bernardo; Jewish General Hospital<br/>         Kroger, Edeltraut; Université Laval, Faculty of Pharmacy<br/>         Kudrina, Irina; McGill University, Department of Family Medicine<br/>         Lebouche, Bertrand; McGill University, Department of Family Medicine<br/>         Loignon, Christine; Université de Sherbrooke, Department of Family<br/>         Medicine<br/>         Lussier, Marie-Therese; Université de Montréal, Family and Emergency<br/>         Medicine<br/>         Martello, Cristiano; McGill University, Department of Family Medicine<br/>         Nguyen, Quynh; McGill University, Department of Family Medicine<br/>         Pratt, R; University of Minnesota<br/>         Rihoux, Benoit; Université catholique de Louvain, Centre de Science<br/>         Politique et de Politique Comparée<br/>         Rosenberg, Ellen; McGill University, Department of Family Medicine<br/>         Samson, Isabelle; Université Laval, Department of Family Medicine and<br/>         Emergency Medicine</p> |

|                                 |                                                                                                                                                                                                                                                                                                                                                                                                                                                                                                                              |
|---------------------------------|------------------------------------------------------------------------------------------------------------------------------------------------------------------------------------------------------------------------------------------------------------------------------------------------------------------------------------------------------------------------------------------------------------------------------------------------------------------------------------------------------------------------------|
|                                 | Senn, Nicolas; Lausanne University Hospital, Department of Ambulatory Care and Community Medicine<br>Li Tang, David; McGill University, Department of Family Medicine<br>Tsujimoto, Masashi; Japan National Center for Geriatrics & Gerontology<br>Vedel, Isabelle; McGill University, Department of Family Medicine<br>Ventelou, Bruno; Aix Marseille Université , School of Economics - SESSTIM UMR 912, Inserm IRD<br>Wensing, Michel; Heidelberg University, Department of General Practice and Health Services Research |
| <b>Primary Subject Heading</b>: | Health services research                                                                                                                                                                                                                                                                                                                                                                                                                                                                                                     |
| Secondary Subject Heading:      | Patient-centred medicine                                                                                                                                                                                                                                                                                                                                                                                                                                                                                                     |
| Keywords:                       | Patients with complex care needs, Shared decision making, Interprofessional care, PRIMARY CARE                                                                                                                                                                                                                                                                                                                                                                                                                               |
|                                 |                                                                                                                                                                                                                                                                                                                                                                                                                                                                                                                              |

SCHOLARONE™  
Manuscripts

peer review only

1  
2  
3  
4  
5  
6  
7  
8  
9  
10  
11  
12  
13  
14  
15  
16  
17  
18  
19  
20  
21  
22  
23  
24  
25  
26  
27  
28  
29  
30  
31  
32  
33  
34  
35  
36  
37  
38  
39  
40  
41  
42  
43  
44  
45  
46  
47  
48  
49  
50  
51  
52  
53  
54  
55  
56  
57  
58  
59  
60

1 **Decisional needs assessment of patients with complex care needs in primary care: a**  
2 **participatory systematic mixed studies review protocol**

3  
4 Authors: Mathieu Bujold<sup>1</sup>, Pierre Pluye<sup>1</sup>, France Légaré<sup>2</sup>, Jeannie Haggerty<sup>1</sup>, Genevieve C.  
5 Gore<sup>3</sup>, Reem El Sherif<sup>1</sup>, Marie-Eve Poitras<sup>2</sup>, and the participatory review team\*

6  
7 **Participatory review team** (co-researchers, knowledge users and international experts):

8 Beaulieu, M-C.<sup>4</sup>, Beaulieu, M-D.<sup>5</sup>, Bush, P.L.<sup>1</sup>, Couturier, Y.<sup>6</sup>, Débarges, B.<sup>7</sup>, Gagnon, J.<sup>1</sup>,  
9 Giguère, A.<sup>2</sup>, Grad, R.<sup>1</sup>, Granikov, V.<sup>1</sup>, Goulet, S.<sup>4</sup>, Hudon, C.<sup>4</sup>, Kremer, B.<sup>8</sup>, Kröger, E.<sup>9</sup>,  
10 Kudrina, I.<sup>1</sup>, Lebouché, B.<sup>1</sup>, Loignon, C.<sup>4</sup>, Lussier, M-T.<sup>5</sup>, Martello, C.<sup>1</sup>, Nguyen, Q.<sup>1</sup>, Pratt, R.<sup>10</sup>,  
11 Rihoux, B.<sup>11</sup>, Rosenberg, E.<sup>1</sup>, Samson, I.<sup>2</sup>, Senn N.<sup>12</sup>, Tang, D.<sup>1</sup>, Tsujimoto, M.<sup>13</sup>, Vedel, I.<sup>1</sup>,  
12 Ventelou, B.<sup>14</sup>, Wensing, M.<sup>15</sup>

13  
14 **Affiliations**

15 1 Department of Family Medicine, McGill University, Montreal, Canada

16 2 Department of Family Medicine and Emergency Medicine, Université Laval, Quebec, Canada

17 3 McGill Library, McGill University, Montreal, Canada

18 4 Department of Family Medicine, Université de Sherbrooke, Canada

19 5 Family and Emergency Medicine, Université de Montréal, Canada

20 6 École de travail social, Université de Sherbrooke, Canada

21 7 Beatitude Patient engagement in research, Sherbrooke, Canada

22 8 Jewish General Hospital, Montreal, Canada

23 9 Faculty of Pharmacy, Université Laval, Québec, Canada

24 10 Department of Family Medicine and Community Health, University of Minnesota,  
25 Minneapolis, United States

26 11 Centre de Science Politique et de Politique Comparée, Université catholique de Louvain,  
27 Belgique

28 12 Université de Lausanne, Switzerland

29 13 Japan National Center for Geriatrics & Gerontology, Obu City, Japan

30 14 Université d'Aix-Marseille, France



1  
2  
3 1 15 Department of General Practice and Health Services Research, Heidelberg University,  
4  
5 2 Germany

6  
7 3 **Corresponding author**

8  
9 4 Mathieu Bujold, PhD, MA, MSc  
10  
11 5 Post-doctoral researcher, Quebec SPOR SUPPORT Unit  
12  
13 6 Department of Family Medicine, McGill University  
14  
15 7 5858 Cote-des-Neiges, 3rd Floor, Suite 300, Montreal, QC, H3S 1Z1  
16  
17 8 [mathieu.bujold@mcgill.ca](mailto:mathieu.bujold@mcgill.ca)  
18  
19 9

20 10 **Abstract**

21 11 INTRODUCTION

22  
23 12 Patients with complex care needs (PCCNs) often suffer from combinations of multiple chronic  
24  
25 13 conditions, mental health problems, drug interactions and social vulnerability, which can lead to  
26  
27 14 health care services overuse, underuse or misuse. Typically, PCCNs face interactional issues and  
28  
29 15 unmet decisional needs regarding possible options in a cascade of interrelated decisions involving  
30  
31 16 different stakeholders (themselves, their families, their caregivers, their health care practitioners).  
32  
33 17 Gaps in knowledge, values clarification and social support in situations where options need to be  
34  
35 18 deliberated hamper effective decision support interventions. This review aims to: (1) assess  
36  
37 19 decisional needs of PCCNs from the perspective of stakeholders; (2) build a taxonomy of these  
38  
39 20 decisional needs; and (3) prioritize decisional needs with knowledges users (clinicians, patients  
40  
41 21 and managers).  
42

43 22  
44 23 METHODS AND ANALYSIS

45  
46 24 This review will be based on the Interprofessional Shared Decision Making (IP-SDM) model and  
47  
48 25 the Ottawa Decision Support Framework. Applying a participatory research approach, we will  
49  
50 26 identify potentially relevant studies through a comprehensive literature search; select relevant  
51  
52 27 ones using eligibility criteria inspired from our previous scoping review on PCCNs; appraise  
53  
54 28 quality using the Mixed Methods Appraisal Tool; conduct a 3-step synthesis (sequential  
55  
56 29 exploratory mixed methods design) to build taxonomy of key decisional needs; and integrate  
57  
58 30 these results with those of a parallel PCCNs' qualitative decisional need assessment (semi-  
59  
60 31 structured interviews and focus group with stakeholders).

## 1 ETHICS AND DISSEMINATION

2 This systematic review, together with the qualitative study, will produce a working taxonomy of  
3 key decisional needs (ontological contribution), to inform the subsequent user-centered design of  
4 an IP-SDM support tool for addressing PCCNs' decisional needs with multiple stakeholders  
5 (practical contribution). We will adapt the IP-SDM model, normally dealing with a single  
6 decision, for PCCNs who experience cascade of decisions involving different stakeholders  
7 (theoretical contribution). Knowledge users will facilitate dissemination of the results in the  
8 Canadian primary care network.

9  
10 **Trial registration number:** Our protocol is registered with PROSPERO (registration number  
11 CRD42015020558).

### 12 **Strengths and limitations of this study**

- 13 • This review will clarify decisional needs of patients with complex care needs (PCCNs) to  
14 inform the subsequent user-centered design of an Interprofessional Shared Decision Making  
15 (IP-SDM) support tool for addressing PCCNs' decisional needs with multiple stakeholders.
- 16 • This work will be conducted with a participatory research approach involving multiple  
17 knowledge users', including patients' perspectives.
- 18 • Large team governance can be an issue; thus, an executive task force will carry out the  
19 review.
- 20 • There is a two-way knowledge gap this systematic review will help to fill: firstly, the majority  
21 of intervention studies address simple care needs rather than complex ones; and secondly,  
22 current systematic reviews typically focus on one condition and one homogeneous  
23 population.
- 24 • The studies heterogeneity challenge will be raised by using an innovative mixed methods  
25 design 3-step synthesis to build a taxonomy presenting various key decisional needs  
26 configuration.
- 27

## 1 Introduction

### 3 Rationale for the review

5 Community-based primary health care (hereafter, primary care) plays a key role regarding  
6 situations of complex care needs<sup>1-3</sup>. Patients with complex care needs (PCCNs) often suffer from  
7 combinations of multiple chronic conditions, mental health problems, drug interactions and social  
8 vulnerability, which can lead to health care services overuse, underuse or misuse<sup>1 4 5</sup>. However,  
9 this does not fully capture the complex care needs experience that encompasses individual  
10 (patient and practitioner), interpersonal (patient-practitioner or interprofessional), organizational  
11 (e.g., resources), and socio-cultural characteristics (e.g., values)<sup>4 6-8</sup>. Typically, PCCNs face  
12 interactional issues related to personal uncertainty or disagreements regarding possible options  
13 (decisional conflict) and unmet decisional needs (e.g., knowledge acquisition, clarification of  
14 values and preferences, support, and resources). The complexity of decision-making could be  
15 exacerbated by a cascade of interrelated decisions involving different stakeholders (PCCNs, their  
16 families, their caregivers, their health care practitioners, etc.). Gaps in knowledge, values  
17 clarification and social support in these situations where multiple options need to be deliberated  
18 (decisional needs) hamper decision support interventions.

20 In a quality improvement process, a group of health and social primary care practitioners, patients  
21 and researchers from Practice Based Research Networks (PBRNs) identified the necessity to  
22 better understand PCCNs' decisional needs. Team members contributed to a pilot project that  
23 sought to identify characteristics of PCCNs and possible support interventions<sup>9 10</sup>. A case series<sup>9</sup>  
24 and a scoping review<sup>10</sup> revealed that interprofessional coordination of care and lack of  
25 stakeholders' agreement are two major issues affecting this population. It is necessary to better  
26 understand the decisional needs of PCCNs associated with mismatched knowledge, expectations,  
27 personal values, as well as social support related to a variety of personal, socio-cultural and  
28 clinical characteristics. Three individual evaluation tools of complex care needs<sup>11-13</sup> and one  
29 study about patient preference in the context of multi-morbidity were identified<sup>14 15</sup>. In the  
30 literature, we found no tool to facilitate shared decision making between PCCNs, their families  
31 and caregivers, and health care providers. Thus, our target population, PCCNs, may benefit from

1  
2  
3 1 a decisional needs assessment to inform the design of an interprofessional shared decision  
4  
5 2 making tool that accounts for their knowledge, values and preferences<sup>16</sup>.

### 3 **Interprofessional Shared Decision Making (IP-SDM) model**

4  
5 Shared Decision Making (SDM) is a process where one patient and one health professional work  
6 together to make a healthcare choice; it is essential for informed consent and patient centred care  
7 <sup>17-22</sup>. Industrialised countries such as Australia<sup>23</sup>, UK<sup>24</sup> and USA<sup>25</sup> are currently implementing  
8 large SDM initiatives. SDM is an effective decision making process when careful deliberation is  
9 needed to address uncertainties inherent to evidence-based medicine, and to weigh the risks and  
10 benefits of patients' healthcare choices (based on their values and preferences). Many factors  
11 may influence the choices individuals make and the roles they attribute to others and to  
12 themselves in the context of interprofessional care <sup>26-29</sup>, which justifies framing this review with  
13 the Interprofessional Shared Decision Making (IP-SDM) model <sup>30</sup>.

14  
15 The IP-SDM model extends the SDM beyond the patient-health professional dyad to  
16 interprofessional (IP) teams <sup>30-32</sup>. In addition to its interprofessional component, this model  
17 proposes to include family members and potential caregivers in a patient-centered process  
18 (Figure 1). This model aims to stimulate deliberation and reach a common understanding among  
19 patients, family/surrogate/significant others, decision coaches, and health care professionals. The  
20 IP-SDM model follows a patient-centered step by step process: (1) choose a decision to make and  
21 explore related options; (2) exchange information; (3) clarify values and preferences; (4) assess  
22 the feasibility of the decision; (5) choose the preferred decision option; (6) implement the  
23 decision; (7) assess the outcome. Based on the IP-SDM model interventions have been developed  
24 for specific decision-making situations. For example, a study is currently under way to scale up  
25 and evaluate the implementation of IP-SDM intervention for frail elderly clients or their  
26 caregivers facing a decision about staying at home or moving elsewhere <sup>33 34</sup>. The IP-SDM also  
27 takes into account the environmental complexity in which the SDM takes place (socio-cultural  
28 norm, organizational routines, and institutional structure). This model is particularly relevant to  
29 help IP teams respond to decisional needs of PCCNs as it helps the stakeholders reach informed  
30 value-based decisions <sup>30 31 35</sup>. Typically, the IPSDM is used for one decision. We will be the first

1  
2  
3 1 team to adapt this model for PCCNs who experience complex interrelated decisions involving  
4 2 different stakeholders with various opinions.  
5  
6  
7 3

#### 8 4 **Decisional needs assessment**

9  
10 5 A decisional need is usually derived from a needs assessment that addresses or focuses on a  
11 6 situation where multiple options need to be deliberated. Assessing decisional needs is needed in  
12 7 order to elaborate effective decision support, even more so when an interprofessional team is  
13 8 required to provide decision support to a patient. A decisional needs assessment is particularly  
14 9 relevant for PCCNs, such as prioritizing a cascade of complex decisions that involve multiple  
15 10 stakeholders. Decision support interventions address stakeholders' decisional needs (decisional  
16 11 conflict, lack of knowledge and information exchange, values, expectation and preferences  
17 12 clarification, support and resource). Indeed, unmet decisional needs affects the decision quality  
18 13 (e.g., uninformed, incongruent with values and unsupported socially). This in turn may affect  
19 14 behaviour (e.g., uptake and maintenance of the chosen option), lead to negative emotions (e.g.,  
20 15 decision regret) and impact health care use (e.g., overuse, underuse and misuse). The Ottawa  
21 16 Decision Support Framework (ODSF) informs the conduct of the decisional needs assessment<sup>36</sup>  
22 17<sup>37</sup>.  
23  
24  
25  
26  
27  
28  
29  
30  
31  
32

33 18  
34 19 The decisional needs assessment for PCCNs will answers the following questions: What are the  
35 20 types of decisions have to make complex care needs situations? Which decisions are most  
36 21 frequent? Which decisions are the most difficult to make and why? How these decisions are  
37 22 interrelated? Who are the stakeholders involved in the decision? What is needed to better support  
38 23 regarding the interprofessional shared decision making process (e.g., information, values  
39 24 clarification, social support or else)? What is currently being done? What are the barriers and  
40 25 facilitators for applying this decision support? Several strategies could be mobilized to assess  
41 26 decisional needs of a population<sup>16 38</sup>. One of them consists to review the existing information (i.e.  
42 27 previous studies)<sup>16</sup>.  
43  
44  
45  
46  
47  
48  
49  
50  
51  
52

#### 52 29 **Review question and objectives**

53  
54 30 Our overall review question is: What are, from the perspective of stakeholders, the key decisional  
55 31 needs of patients with complex care needs (PCCNs)? In line with the Knowledge Translation  
56 32 (KT) cycle<sup>39</sup>, the purpose of our systematic review is to provide the needed groundwork to assess  
57  
58  
59  
60

1  
2  
3 1 decisional needs of PCCNs. With a task force and a multidisciplinary team including researchers  
4 and knowledge users in community-based primary health care (see table 1), this review aims to:  
5  
6 (1) Assess decisional needs of PCCNs from the perspective of stakeholders;  
7  
8 (2) Build a taxonomy of these decisional needs;  
9  
10 (3) Prioritize decisional needs with knowledges users (clinicians, patients, managers).  
11  
12  
13

## 14 **Methods**

15 This review will use a multipronged approach. First, we will conduct a systematic mixed studies  
16 review (including qualitative, quantitative and mixed methods studies)<sup>40</sup>. Mixed studies reviews  
17 provide a rich and highly practical understanding of complex health issues<sup>41-46</sup>. Second, we will  
18 use an organizational participatory research approach, involving researchers and knowledge users  
19 (clinicians, patients, managers), to determine key decisional needs.  
20  
21  
22  
23  
24  
25

26 We will, thus, blend research with action using a number of iterative cycles, thereby producing  
27 knowledge that can inform healthcare practices<sup>47-50</sup>. Organizational participatory research  
28 consists of doing research with patients and practitioners, rather than on them; it is a strategy for  
29 organizational change and practice improvement<sup>50-54</sup>. It also supports the idea of producing  
30 knowledge that respond to the needs and perspectives of the knowledge users rather than  
31 producing knowledge to which they need to adapt. This approach is suitable for this review as the  
32 pilot project emerged from practice. A multidisciplinary team blending scientific and practical  
33 knowledge is necessary to achieve our objectives (table 1). Team members are researchers with  
34 various expertise, and knowledge users (directors and clinicians, patients and managers of the  
35 four Quebec network of Practice Based Research Networks (PBRN)<sup>55</sup> and the Quebec SPOR  
36 SUPPORT Unit (SPOR standing for Strategy for Patient Oriented Research). In partnership with  
37 knowledge users, we will systematically search, identify, select, appraise, and synthesize  
38 qualitative and quantitative evidence. An executive task force will lead the review and mobilize  
39 the participatory review team (knowledge users, co-researchers, patient experts, and international  
40 experts).  
41  
42  
43  
44  
45  
46  
47  
48  
49  
50  
51  
52  
53  
54  
55  
56  
57  
58  
59  
60

## 1 **Information sources and search strategy**

2 Building on our previous work <sup>9 10</sup>, the concept map and the search strategy was written and  
3 tested in collaboration with specialized librarians. Based on the scoping review <sup>9</sup>, we anticipate  
4 retrieving about 4500 potentially relevant database records (authors, title, source, abstract) in  
5 MEDLINE (Ovid), Embase (Ovid), PsycINFO (Ovid), CINAHL (EBSCOhost) and Social  
6 Sciences Citation Index (SSCI). In addition, our librarians will provide guidance in searching the  
7 grey literature using Google Scholar, Conference Proceedings Citation Index-Science (CPCI-S)  
8 and specialized websites. After the selection stage, other potentially relevant records will be  
9 sought by tracking citations of included studies using Scopus, up to saturation (no additional  
10 studies found). Our team members, including knowledge users, will be emailed to request  
11 additional records or bibliographies.

12

## 13 **Eligibility criteria and identification of potentially relevant studies**

14 Eligibility criteria will be based upon the previous scoping reviews on PCCNs <sup>10</sup> with a focus on  
15 interactional and decisional issues. A study will be included if it is a French, English, or Spanish  
16 language empirical study about:

- 17 (1) Patients with complex care needs (any study dealing directly or indirectly with PCCNs or a  
18 population with at least one of the following characteristics: multiple chronic conditions;  
19 mental health issues; drug interactions; social vulnerability; or health care services overuse,  
20 underuse and misuse);
- 21 (2) Primary health care setting (any study dealing directly with primary health care setting or  
22 indirectly, e.g., links between primary care and secondary or tertiary care setting)
- 23 (3) Interpersonal relationships (reciprocal interaction of two or more persons, e.g.,  
24 interprofessional, or professional-patient, patient-family or professional-family);
- 25 (4) Decisional needs (frequent or difficult decisions regarding situations where multiple options  
26 are possible, factors affecting the decision making process, decisional conflict, support and  
27 resources used or needed to improve decision quality, barriers and facilitators to using  
28 decision supports).

29

30 We expect to identify about 300 potentially relevant studies. We will use EndNote (reference  
31 management software) to remove duplicates and store records with indexing terms. For each

32

33

34

35

36

1  
2  
3 1 record, two reviewers will independently assign codes according to our eligibility criteria using  
4  
5 2 specialized software (DistillerSR). For each code, we will measure the agreement between  
6  
7 3 reviewers (kappa)<sup>56 57</sup>. When reviewers disagree, the record will be included in the following  
8  
9 4 selection process.  
10  
11 5

### 6 **Selection of relevant studies (coding full-text documents)**

14 7 We anticipate including 150 relevant studies as follows. The two reviewers will independently  
15  
16 8 code each full text paper identified in the previous step. As with identification, inter-reviewer  
17  
18 9 agreement will be measured. Disagreements that are not resolved easily will be referred to a third  
19  
20 10 party<sup>58</sup>.  
21  
22 11

### 12 **Critical appraisal of included studies**

24 13 Critical appraisal is a core component of systematic reviews<sup>39 58</sup>. It provides a rationale to break  
25  
26 14 down the synthesis of included studies by level of quality. We will use the Mixed Methods  
27  
28 15 Appraisal Tool (MMAT)<sup>42 59 60</sup>, a unique validated tool for critically appraising the quality of  
29  
30 16 qualitative, quantitative and mixed methods studies in systematic mixed studies reviews<sup>61</sup>. Using  
31  
32 17 the 2011 version of the MMAT<sup>62</sup> appraisal form and user-manual, two reviewers will  
33  
34 18 independently appraise included studies. As with selection, inter-reviewer agreement will be  
35  
36 19 measured, and disagreements resolved.  
37  
38 20

### 21 **Synthesis design**

40 22 Included studies will be described in a summary table<sup>58 61 63</sup>. Then, guided by a sequential mixed  
41  
42 23 methods design<sup>40 46 64</sup>, we will conduct a 3-step synthesis.  
43  
44 24

46 25 Step 1: Objective 1 -Assess decisional needs of PCCNs from the perspective of stakeholders

47 26 For each included study, two reviewers will independently list decisional needs using a  
48  
49 27 deductive/inductive qualitative thematic analysis with specialized software (NVivo 11)<sup>65-68</sup>. For  
50  
51 28 each decisional need (e.g., goal setting), type of stakeholder (e.g. patient), the facilitators (e.g.,  
52  
53 29 interpreter) and barriers (e.g., language) influencing the decision will be listed, including  
54  
55 30 stakeholders' information needs (e.g., list of option with their, respective, potential benefits and  
56  
57 31 harms), values, preferences and sources of support.  
58  
59  
60



1  
2  
3 1 Data extraction: A hybrid thematic analysis (deductive/inductive) will be used. All articles will  
4  
5 2 be coded using predefined themes (codebook) derived from the IP-SDM model and the ODSF  
6  
7 3 (framework for decisional needs assessment)<sup>38</sup>, as well as themes suggested by the data; thus,  
8  
9 4 creating an inventory of decisional needs and their facilitators and barriers. All team members,  
10  
11 5 including knowledge users, will have the opportunity to discuss and refine the code book during  
12  
13 6 online workshops with the executive task force. Consistency and rigor will be ensured via a  
14  
15 7 process of combining interpretations and dialogues<sup>67 69</sup>. Executive task force team members will  
16  
17 8 examine the inventory and written interpretations, and ask the reviewers to explain strengths and  
18  
19 9 limitations of their interpretations (trustworthiness) and to suggest alternative interpretations.  
20

21 10  
22 11 A comparative analysis will be conducted to explore similarities/differences among stakeholders'  
23  
24 12 perspectives. Using NVivo 11, the qualitative data (excerpt of the selected studies) will be  
25  
26 13 assigned to the following 'type of stakeholder' attribute value: patients, family, caregivers,  
27  
28 14 practitioners, others. This will allow us, for example, to compare the perceptions that patients  
29  
30 15 have of their decisional needs with those of practitioners. We will also assign other categories of  
31  
32 16 attributes (e.g., types of practitioners) to the data.  
33

34 17  
35 18 Data synthesis: A summary table of the analysis will be made by systematically noting the  
36  
37 19 following for all decisional needs: label, definition, type of stakeholder, facilitators that simplify  
38  
39 20 patients' decisions, barriers that make decisions difficult with patients, key excerpts of articles  
40  
41 21 broken down by decisional need (illustrative examples). The summary table will be posted on our  
42  
43 22 review blog, and the team members (researchers and knowledge users) will provide feedback.  
44  
45 23 Given the feedback, some of the decisional needs will be revised, and modifications will be  
46  
47 24 discussed. Then, a harmonization of themes will be conducted<sup>70</sup>. For each term, the usage will be  
48  
49 25 confirmed in reference to documents on decision making (distinguishing accurate from improper  
50  
51 26 usage), and accurate usages will be adopted to avoid ambiguity.  
52

53 27  
54 28 Step 2: Objective 2 – Build a taxonomy of decisional needs

55 29 The Configurational Comparative Method (CCM) is a case-based analysis useful for building  
56  
57 30 taxonomies<sup>71 72</sup>. For this review, each included study will be a case. Using CCM, we will  
58  
59 31 determine commonalities in the relationships between decisional needs, their facilitators and  
60

1  
2  
3 1 barriers. We will use CCM to test relationships between decision-related variables using Boolean  
4 algebra. The main steps of a CCM analysis are: defining conditions and outcomes, extracting  
5 2 data, preparing a truth table (cases in row, and conditions and outcome in columns), performing  
6 3 data minimization with specialized software (QCA-GUI), and interpreting results. CCM is  
7 4 appropriate for two reasons: the theory-driven approach (IP-SDM) and the heterogeneity of study  
8 5 designs. The conditions and outcomes will be determined following the qualitative synthesis of  
9 6 the included studies.  
10 7  
11 8

12 9 Data extraction: We will use a data extraction form to ensure a systematic process<sup>73</sup>. Then, we  
13 10 will conduct a quantitative content analysis<sup>74</sup>. The codebook will contain categories listed in  
14 11 step-one (deductive coding), and will be tested by two coders using a random sample of 10% of  
15 12 our cases (studies). For each case, the two coders will independently assign text excerpts to codes  
16 13 (variables and values). This will produce a table of raw data. Inter-coder agreement will be  
17 14 measured (kappa). Disagreements that are not resolved easily will be referred to a third party. For  
18 15 each code with less than substantial agreement ( $\text{kappa} < 0.61$ )<sup>57</sup>, the codebook will be revised  
19 16 (label, definition and key extracts) and an additional random sample of cases (10%) will be  
20 17 coded.  
21 18

22 19 Data synthesis: Data will be discussed by executive task force members, to produce a table of  
23 20 binary variables with cases in rows and variables in columns. Then, we will conduct the CCM<sup>71</sup>  
24 21<sup>72</sup>, group similar cases in sets, and produce a table of configurations of decisional needs (sets in  
25 22 rows, variables in columns). Results will be interpreted by going back and forth between  
26 23 configurations and cases. The configurations will allow us to ‘pose more focused questions’ on  
27 24 the cases<sup>72</sup>. Configurations of decisional needs and interpretations will be reviewed. The  
28 25 configurations of decisional needs will be posted on the blog, and feedback provided by the team  
29 26 members. Discrepancies that are not resolved easily will be referred to a third party. The  
30 27 synthesis will produce a comprehensive taxonomy of decisional needs for PCCNs.  
31 28

32 29 Step 3: Objective 3 - Determine key decisional needs

33 30 The taxonomy will be discussed in half-day workshops with team members, and a penultimate  
34 31 taxonomy will be posted on the blog. Then, the importance of decisional needs (taxonomy  
35  
36  
37  
38  
39  
40  
41  
42  
43  
44  
45  
46  
47  
48  
49  
50  
51  
52  
53  
54  
55  
56  
57  
58  
59  
60

1  
2  
3 1 elements) will be rated by the team members with a blog-embedded web-questionnaire and a 5-  
4 item Likert scale (from ‘not important at all’ to ‘extremely important’). Discrepancies (e.g., a  
5 2 need with a variety of ratings from low to high importance) that are not resolved easily will be  
6 3 referred to a third party. This will produce a taxonomy of key decisional needs, facilitators and  
7 4 barriers.  
8 5  
9 6

10 7 The taxonomy will be compared and integrated with the results of a parallel qualitative decisional  
11 8 need assessment of PCCNs that is part of the provincial “Demonstration project” of the Quebec  
12 9 SPOR SUPPORT Unit funded by CIHR (Canadian Institutes of Health Research), Quebec  
13 10 Ministry of Health and FRQS (Quebec Research Fund). In this parallel qualitative study,  
14 11 conducted by co-authors of this review, semi-structured interviews and focus group will be done  
15 12 with patients/relatives, health and social primary care practitioners and decision makers to  
16 13 empirically assess decisional needs of PCCNs. This qualitative study will involve four expert  
17 14 patients, including one who is participating in all stages of the systematic review. The qualitative  
18 15 decisional need assessment and this systematic review will be done concurrently to validate  
19 16 emerging decisional needs. This will give a deeper and broader understanding to better inform the  
20 17 subsequent user-centered design of an IP-SDM support tool.  
21 18  
22 19

### 23 19 **Discussion and dissemination**

24 20 Patients with complex care needs (PCCNs) are associated with unmet health care needs, overuse,  
25 21 underuse or misuse of health care services, low quality of care, and increased costs of health  
26 22 systems<sup>75-77</sup>. Given the aging population and rising rates of chronic disease, the number of  
27 23 PCCNs is growing<sup>2,5,78</sup>. This systematic review, together with the parallel qualitative study, will  
28 24 contribute to the assessment of decisional needs of PCCNs from the perspective of stakeholders  
29 25 (substantive contribution). The ultimate result of this work will be a working taxonomy of key  
30 26 decisional needs of PCCNs (ontological contribution). We will adapt the IP-SDM model,  
31 27 normally dealing with a single decision, for PCCNs who experience a cascade of complex  
32 28 interrelated decisions involving different stakeholders with various opinions (theoretical  
33 29 contribution). The taxonomy of key decisional needs will inform the subsequent user-centered  
34 30 design an IP-SDM support tool (practical contribution). This tool will frame PCCNs’ decisional  
35 31 needs, help stakeholders prioritize decisions and understand options and PCCNs’ goals, and  
36  
37  
38  
39  
40  
41  
42  
43  
44  
45  
46  
47  
48  
49  
50  
51  
52  
53  
54  
55  
56  
57  
58  
59  
60

1 facilitate finding a common ground crucial for improving patient-practitioner and  
2 interprofessional interactions, quality of decisions and care<sup>79</sup>.

3  
4 This systematic review will help bridge two knowledge gaps: on the one hand, the majority of  
5 intervention studies address simple care needs rather than complex ones; on the other hand,  
6 current systematic reviews typically focus on one condition and one homogeneous population<sup>80-</sup>  
7<sup>84</sup>. The studies' heterogeneity challenge will be addressed by using an innovative mixed methods  
8 design 3-step synthesis to build a taxonomy presenting various key decisional needs'  
9 configurations.

10  
11 Previous studies showed that PCCNs are typically facing interactional issues, which justifies  
12 framing this proposal within the IP-SDM model. Evidence shows that SDM support tools  
13 improve patient-practitioner interactions and decision quality, and reduce ineffective care<sup>3 85-87</sup>.  
14 However, we know of no decision support tool that could facilitate shared decision making  
15 between PCCNs and multiple professionals. One contribution of this review will be to enhance  
16 decision support for these patients.

17  
18 As with all systematic reviews, due to publication bias, this work will be biased toward positive  
19 results and runs a risk of conflating pre-determined outcomes that were identified by authors of  
20 the studies with the decisional needs of PCCNs. This limitation will be reduced by validating the  
21 results with the knowledge users (clinicians, patients and managers) and the qualitative results of  
22 the Demonstration project of the Quebec SPOR SUPPORT Unit).

23  
24 This review emerged from two Quebec PBRN pilot work, addresses an important issue for  
25 knowledges users and is a priority of the Quebec Ministry of Health<sup>88</sup>. In line with Canadian  
26 Institutes for Health Research (CIHR) priorities<sup>1</sup>, patients' perspectives will be included in this  
27 review given our organizational participatory research approach and our user-centered design.  
28 Diffusion will involve raising general awareness about our results through conference  
29 presentations and publications. Dissemination, a more active and targeted strategy, will consist of

---

<sup>1</sup> <http://www.cihr-irsc.gc.ca/e/193.html>

1  
2  
3 1 reaching other knowledge users through websites, listservs, and peer networks through Quebec  
4  
5 2 PBRNs and the Canadian SPOR networks.  
6  
7 3  
8  
9 4

## 10 **SYSTEMATIC REVIEW STATUS**

11  
12 6 The review is currently in the protocol and search strategy updating phase. We are testing the  
13  
14 7 search strategy in Ovid MEDLINE (2017/02/06). We expect to complete the selection of relevant  
15  
16 8 studies in 2017 and design the first version of the IP-SDM support tool in 2018.  
17  
18 9

## 19 **ABBREVIATIONS**

- 20  
21 11 • CIHR : Canadian Institutes of Health Research  
22  
23 12 • FRQS: Fond de recherche du Québec – Santé  
24  
25 13 • IP-SDM: Interprofessional Shared Decision Making  
26  
27 14 • KT: Knowledge Translation  
28  
29 15 • ODSF: Ottawa Decision Support Framework  
30  
31 16 • PCCNs : Patients with complex care needs  
32  
33 17 • PBRN: Practice Based Research Network  
34  
35 18 • SPOR: CIHR Strategy for Patient Oriented Research  
36

## 37 **KEY TERMS**

- 38  
39 21 • KNOWLEDGE USERS: The directors and the members (clinicians, patients, managers) of the  
40  
41 22 four Quebec PBRNs and the Quebec SPOR SUPPORT Unit.  
42  
43 23 • TEAM MEMBERS: all co-authors (knowledge users and researchers) and collaborators (see  
44  
45 24 acknowledgements).  
46  
47 25 • PRIMARY CARE: Community based primary health care.  
48  
49 26 • STAKEHOLDERS: Patients with complex care needs, their families, their caregivers, their  
50  
51 27 health care practitioners or any other people involved in decisions-making related to their  
52  
53 28 complex care needs (e.g. surrogate, significant others, case manager, decision coach, navigator,  
54  
55 29 mediator, interpreter).  
56  
57  
58  
59  
60

## 1 ACKNOWLEDGEMENTS

2 The preparation of this protocol was supported by the Quebec SPOR SUPPORT Unit and funded  
3 by the Canadian Institutes of Health Research (CIHR). Pierre Pluye holds a salary award from the  
4 Fonds de recherche du Québec – Santé (FRQS). Authors gratefully acknowledge and the  
5 following collaborators: Magali Bigras and Alain Boulet, *Centre de santé et de services sociaux*  
6 *de Gatineau*, Canada ; Lynn R. McLauchlin, St. Mary's Hospital Center, Montreal, Canada; Silvia  
7 Duong, Jewish General Hospital, Montreal, Canada; and Fanny Hersson, Department of Family  
8 Medicine, McGill University, Canada).

## 9 AUTHOR CONTRIBUTIONS

10 PP, FL and MB conceived and designed the review with input from all team members. MB  
11 drafted the manuscript. All authors (MB, PP, FL, JH, GG, RES, MEP, MCB, MDB, PLB, YC,  
12 BD, JG, AG, RG, VG, SG, CH, BK, EK, IK, BL, CL, MTL, CM, QN, RP, BR, ER, IS, NS, DT,  
13 MT, IV, BV, MW) read, critically revised, and approved the final manuscript and will participate  
14 to workshops. Executive task force are (MB, PP, RES). Team members are (i) knowledge users  
15 (JH, MCB, MDB, BD, BK, IK, MTL, CM, ER, IS, NS, RG, SG); (ii) co-researchers (FL, GG,  
16 MEP, PLB, YC, JG, AG, VG, CH, EK, BL, CL, QN, RP, BR, DT, MT, IV, BV, MW, BPL, CY,  
17 GA); (iii) international experts (RB, RP, NS, MT, BV, MW). The executive team is doing the  
18 bulk of the work. GG participated intensively in the systematic search strategy planning and  
19 operationalisation. The authors of this systematic review who are also involved in the qualitative  
20 decisional need assessment study are MEP, FL (co-leaders), MB, CH, PP (co-researchers) and  
21 BD, MDB (knowledge users).

## 25 FUNDING STATEMENT

26 This work is funded by the Canadian Institutes for Health Research (CIHR) grant number 2016  
27 30KRS-367087. CIHR had no role in the development of this protocol.

## 29 COMPETING INTERESTS

30 The authors declare no competing interests.

**Table 1 The multidisciplinary expertise of the research team and collaborators**

| <b>EXPERTISE</b>                              | <b>NAMES*</b>                                                                                                                                                                                                                                                                                                                                              | <b>N</b> |
|-----------------------------------------------|------------------------------------------------------------------------------------------------------------------------------------------------------------------------------------------------------------------------------------------------------------------------------------------------------------------------------------------------------------|----------|
| Home health care                              | Beaulieu, M-C.; Duong, S.; Kremer, B.; Poitras, M-E.                                                                                                                                                                                                                                                                                                       | 4        |
| Interprofessional / Integrated care           | Beaulieu, M-C.; Bujold, M.; Couturier, Y.; Haggerty, J.; Légaré, F.; Poitras, M-E.; Vedel, I.                                                                                                                                                                                                                                                              | 7        |
| Knowledge transfer and participatory research | Bigras, M.; Boulet, A.; Bujold, M.; Bush, P.L.; Duong, S.; Giguere, A.; Grad, R.; Goulet, S.; Granikov, V.; Haggerty, J.; Kremer, B.; Kroger, E.; Légaré, F.; Lussier, M-T.; Martello, C.; Pluye, P.; Pratt, R.; McLauchlin, L.R.; Samson, I.; Senn, N.; Tsujimoto, M.; Ventelou, B.; Vedel, I.; Wensing, M.                                               | 24       |
| Patients with complex care needs              | Bigras, M.; Boulet, A.; Bujold, M.; Couturier, Y.; Débarges, B.; Duong, S.; Goulet, S.; Grad, R.; Granikov, V.; Hudon, C.; Kremer, B.; Kroger, E.; Lebouché, B.; Loignon, C.; Lussier, M-T.; McLauchlin, L.R.; Martello, C.; Poitras, M-E.; Pluye, P.; Pratt, R.; Rosenberg, E.; Samson, I.; Senn, N.; Ventelou, B.; Tsujimoto, M.; Vedel, I.; Wensing, M. | 26       |
| Patient and partner engagement                | Bujold, M.; Bush, P.L.; Débarges, B.; Granikov, V.; Loignon, C.; Pluye, P.; Poitras, M-E.; Samson, I.                                                                                                                                                                                                                                                      | 8        |
| Populations in situations of vulnerability    | Couturier, Y.; Giguere, A.; Hudon, C.; Loignon, C.; Lebouché, B.; Kroger, E.; Rosenberg, E.; Tsujimoto, M.; Samson, I.; Ventelou, B.                                                                                                                                                                                                                       | 10       |
| Shared Decision Making                        | Bujold, M.; Légaré, F.; Haggerty, J.; Hudon, C.; Giguere, A.; Lussier, M-T.; Pluye, P.; Poitras, M-E.; Rosenberg, E.; Senn, N.; Wensing, M.                                                                                                                                                                                                                | 11       |
| Systematic mixed studies reviews              | Bujold, M.; Bush, P.L.; El Sherif, R.; Gore, G.; Kroger, E.; Lebouché, B.; Légaré, F.; Pluye, P.; Rihoux, B.; Rosenberg, E.; Tang, D.; Vedel, I.; Wensing, M.                                                                                                                                                                                              | 13       |
| Tool development and validation               | Bujold, M.; El Sherif, R.; Grad, R.; Giguere, A.; Lussier, M-T.; Légaré, F.; Li Tang, D.; Pluye, P.; Pratt, R.; Senn, N.; Wensing, M.                                                                                                                                                                                                                      | 11       |
| <b>PROFESSION</b>                             | <b>NAMES*</b>                                                                                                                                                                                                                                                                                                                                              | <b>N</b> |
| Biology                                       | Bujold, M.; Débarges, B.; Giguere, A.                                                                                                                                                                                                                                                                                                                      | 3        |
| Computer science                              | Tang, D.,                                                                                                                                                                                                                                                                                                                                                  | 1        |
| Epidemiology                                  | Haggerty, J.; El Sherif, R.; , Kröger, E.                                                                                                                                                                                                                                                                                                                  | 3        |
| Librarianship                                 | Gore, G.; Granikov, V.                                                                                                                                                                                                                                                                                                                                     | 2        |
| Medicine                                      | Bigras, M.; Beaulieu, M-C.; Beaulieu, M.D.; Goulet, S.; Grad, R.; Hersson, F.; Hudon, C.; Lebouché, B.; Légaré, F.; Lussier, M-T.; Martello, C.; McLauchlin, L.R.; Pluye, P.; Pratt, R.; Rosenberg, E.; Samson, I.; Senn, N.; Ventelou, B.; Wensing, M.                                                                                                    | 19       |
| Nursing                                       | Boulet, A.; Poitras, M-E.;                                                                                                                                                                                                                                                                                                                                 | 2        |
| Occupational/physical therapy                 | Bush, P.L.                                                                                                                                                                                                                                                                                                                                                 | 1        |
| Pharmacy                                      | Duong, S.; Kroger, E.                                                                                                                                                                                                                                                                                                                                      | 2        |
| Public health                                 | Légaré, F.; Loignon, C.; Pluye, P.; Vedel, I.; Wensing, M.                                                                                                                                                                                                                                                                                                 | 5        |
| Social work and social sciences               | Bujold, M.; Couturier, Y.; Gagnon, J.; Hudon, C.; Loignon, C.; Rihoux, B.                                                                                                                                                                                                                                                                                  | 6        |

\*Alphabetical order

1  
2  
3  
4  
5  
6  
7  
8  
9  
10  
11  
12  
13  
14  
15  
16  
17  
18  
19  
20  
21  
22  
23  
24  
25  
26  
27  
28  
29  
30  
31  
32  
33  
34  
35  
36  
37  
38  
39  
40  
41  
42  
43  
44  
45  
46  
47  
48  
49  
50  
51  
52  
53  
54  
55  
56  
57  
58  
59  
60

1 **Figure 1 legend.** The Interprofessional Shared Decision Making (IP-SDM) model was designed  
2 to broaden the perspective of shared decision making (SDM) beyond the patient-practitioner dyad  
3 and include interprofessional (IP) teams. For more details on the IP-SDM model, please  
4 consult the following website:

5 <http://www.decision.chaire.fmed.ulaval.ca/en/research/projects/interprofessional-approaches/>  
6

For peer review only



1  
2  
3 1 **REFERENCES**

- 4  
5 2 1. Grant RW, Ashburner JM, Hong CS, et al. Defining patient complexity from the primary  
6 3 care physician's perspective: A cohort study. *Ann Intern Med* 2011;155(12):797-804.  
7 4 2. Katerndahl DA, Wood R, Jaen CR. A method for estimating relative complexity of  
8 5 ambulatory care. *Ann Fam Med* 2010;8(4):341-47.  
9 6 3. Shi L. The impact of primary care: A focused review. *Scientifica* 2012;2012.  
10 7 4. Schaink AK, Kuluski K, Lyons RF, et al. A scoping review and thematic classification of  
11 8 patient complexity: Offering a unifying framework. *Journal of Comorbidity*  
12 9 2012;2(1):1-9.  
13 10 5. Smith S, Soubhi H, Fortin M, et al. Managing patients with multimorbidity: systematic  
14 11 review of interventions in primary care and community settings. *BMJ* 2012;  
15 12 345(e5205).  
16 13 6. Loeb DF, Bayliss EA, Binswanger IA, et al. Primary care physician perceptions on caring  
17 14 for complex patients with medical and mental illness. *J Gen Intern Med*  
18 15 2012;27(8):945-52.  
19 16 7. Safford MM, Allison JJ, Kiefe CI. Patient complexity: More than comorbidity. The vector  
20 17 model of complexity. *J Gen Intern Med* 2007;22(Suppl 3):382-90.  
21 18 8. Johnson DR, Ziersch AM, Burgess T. I don't think general practice should be the front line:  
22 19 Experiences of general practitioners working with refugees in South Australia.  
23 20 *Australia and New Zealand health policy* 2008;5.  
24 21 9. Martello C, Bessière G, Bigras M, et al. What Do We Mean When We Say "This Patient is  
25 22 Complex"? . NAPCRG Annual Conference (North American Primary Care Research  
26 23 Group). New York, 2014.  
27 24 10. Pluye P, Bessière G, Bigras M, et al. Characteristics of Complex Care Needs and  
28 25 Interventions Suited for Patients With Such Needs: A Participatory Scoping Review.  
29 26 NAPCRG Annual Conference (North American Primary Care Research Group). New  
30 27 York, 2014.  
31 28 11. Laerum E, Steine S, Finset A. The Patient Perspective Survey (PPS): A new tool to  
32 29 improve consultation outcome and patient involvement in general practice patients  
33 30 with complex health problems. *Patient Educ Couns* 2004;52(2):201-07.  
34 31 12. Peek CJ. Integrating care for persons, not only diseases. *J Clin Psychol Med Settings*  
35 32 2009;16(1):13-20.  
36 33 13. Stiefel FC, Huyse FJ, Söllner W, et al. Operationalizing integrated care on a clinical level:  
37 34 The INTERMED project. *Med Clin North Am* 2006;90(4):713-58.  
38 35 14. Fried TR, Tinetti M, Agostini J, et al. Health outcome prioritization to elicit preferences of  
39 36 older persons with multiple health conditions. *Patient Educ Couns* 2011;83(2):278-  
40 37 82.  
41 38 15. Mangin D, Stephen G, Bismah V, et al. Making patient values visible in healthcare: a  
42 39 systematic review of tools to assess patient treatment priorities and preferences in  
43 40 the context of multimorbidity. *BMJ Open* 2016;6(6):e010903.  
44 41 16. St-Jacques S, Grenier S, Charland M, et al. Decisional needs assessment regarding Down  
45 42 syndrome prenatal testing: a systematic review of the perceptions of women, their  
46 43 partners and health professionals. *Prenat Diagn* 2008;28(13):1183-203.  
47 44 17. Weston WW. Informed and shared decision-making: the crux of patient-centered care.  
48 45 *CMAJ* 2001;165(4):438-9.

18. Makoul G, Clayman ML. An integrative model of shared decision making in medical encounters. *Patient Educ Couns* 2006;60(3):301-12.
19. Legare F, Ratté S, Stacey D, et al. Interventions for improving the adoption of shared decision making by healthcare professionals. *Cochrane Database Syst Rev* 2010(5):CD006732.
20. Legare F, Stacey D, Turcotte S, et al. Interventions for improving the adoption of shared decision making by healthcare professionals. *Cochrane Database Syst Rev* 2014(9):CD006732.
21. Légaré F, Witteman H. Shared decision making: Examining key elements and barriers to adoption into routine clinical practice. *Health affairs (Project Hope)* 2013;32(2):276-84.
22. Melbourne E, Roberts S, Durand MA, et al. Dyadic OPTION: Measuring perceptions of shared decision-making in practice. *Patient Educ Couns* 2011;83(1):55-7.
23. Shared Decision Making: Australian Commission on Safety and Quality in Health Care; 2017 [Available from: <https://www.safetyandquality.gov.au/our-work/shared-decision-making/> accessed 2 Feb 2017.
24. Shared Decision Making: National health service (NHS); 2016 [Available from: <http://sdm.rightcare.nhs.uk/> accessed 2 Feb 2017.
25. The SHARE Approach: Agency for Healthcare Research and Quality (AHRQ); 2016 [Available from: <https://www.ahrq.gov/professionals/education/curriculum-tools/shareddecisionmaking/index.html> accessed 2 Feb 2017.
26. Bujold M. Patient's representation of illness as an interdisciplinary communication channel [Article in French]. *Anthropologie et Sociétés* 2008;32( HS):18-25.
27. Bujold M. Le patient intégrateur: analyse de l'articulation d'une pluralité de voix / voies dans une clinique intégrative québécoise. Université Laval, 2011.
28. Bujold M. Ethnomedical ethics with regard to patient plurivocality: between autonomy and heteronomy [Article in French]. *Journal International de Bioéthique* 2015;26(4):19-36.
29. Gaboury I, Bujold M, Boon H, et al. Interprofessional collaboration within Canadian integrative healthcare clinics: Key components. *Soc Sci Med* 2009;69(5):707-15.
30. Legare F, Stacey D, Pouliot S, et al. Interprofessionalism and shared decision-making in primary care: A stepwise approach towards a new model. *J Interprof Care* 2011;25(1):18-25.
31. Legare F, Stacey D, Graham ID, et al. Advancing theories, models and measurement for an interprofessional approach to shared decision making in primary care: a study protocol. *BMC Health Serv Res* 2008;8:2.
32. Interprofessional Approaches to Shared Decision Making (IP-SDM) 2017 [Available from: <http://www.decision.chaire.fmed.ulaval.ca/en/research/projects/interprofessional-approaches/> accessed 2017-06-1.
33. Legare F, Briere N, Stacey D, et al. Implementing shared decision-making in interprofessional home care teams (the IP-SDM-SW study): protocol for a stepped wedge cluster randomised trial. *BMJ open* 2016;6(11):e014023.
34. Legare F, Stacey D, Briere N, et al. Healthcare providers' intentions to engage in an interprofessional approach to shared decision-making in home care programs: a mixed methods study. *J Interprof Care* 2013;27(3):214-22.

- 1  
2  
3 1 35. Muntinga ME, Hoogendijk EO, van Leeuwen KM, et al. Implementing the chronic care  
4 2 model for frail older adults in the Netherlands: study protocol of ACT (frail older  
5 3 adults: care in transition). *BMC Geriatr* 2012;12:19.  
6 4  
7 4 36. Légaré F, O'Connor A, Graham I, et al. Supporting patients facing difficult health care  
8 5 decisions: use of the Ottawa Decision Support Framework. *Canadian Family*  
9 6 *Physician* 2006;52(4):476-77.  
10 7  
11 7 37. OHRI. Ottawa Decision Support Framework 2015 [Available from:  
12 8 <https://decisionaid.ohri.ca/odsf.html> accessed June 27 2017.  
13 9  
14 9 38. Jacobsen MJ, O'Connor AM, Stacey D. Decisional Needs Assessment in Populations. A  
15 10 workbook for assessing patients' and practitioners' decision making needs.  
16 11 University of Ottawa 1999 [updated 2013] [Available from:  
17 12 <https://decisionaid.ohri.ca/docs/implement/PopulationNeeds.pdf> accessed Feb 2  
18 13 2017.  
19 14  
20 14 39. Straus SE, Tetroe J, Graham I. Defining knowledge translation. *Canadian Medical*  
21 15 *Association Journal* 2009;181(3-4):165-68.  
22 16  
23 16 40. Pluye P, Hong QN. Combining the power of stories and the power of numbers: Mixed  
24 17 methods research and mixed studies reviews. *Annu Rev Public Health* 2014;35:29-  
25 18 45.  
26 19  
27 19 41. Grant M, Booth A. A typology of reviews: An analysis of 14 review types and associated  
28 20 methodologies. *Health Info Libr J* 2009;26(2):91-108.  
29 21  
30 21 42. Pluye P, Gagnon MP, Griffiths F, et al. A scoring system for appraising mixed methods  
31 22 research, and concomitantly appraising qualitative, quantitative and mixed methods  
32 23 primary studies in mixed studies reviews. *Int J Nurs Stud* 2009;46(4):529-46.  
33 24  
34 24 43. Pope C, Mays N, Popay J. Synthesizing qualitative and quantitative health evidence: A  
35 25 guide to methods. Berkshire: Open University Press 2007.  
36 26  
37 26 44. Sheldon TA. Making evidence synthesis more useful for management and policy-making.  
38 27 *J Health Serv Res Policy* 2005;10(3 Suppl. 1):1-5.  
39 28  
40 28 45. Pluye P, Hong Q, I. V. The plurality of review methods and synthesis methods: Opening-  
41 29 up the definition of systematic reviews [invited peer-reviewed paper on knowledge  
42 30 syntheses]. *J Clin Epi* In Press.  
43 31  
44 31 46. Hong QN, Pluye P, Bujold M, et al. Convergent and sequential synthesis designs:  
45 32 implications for conducting and reporting systematic reviews of qualitative and  
46 33 quantitative evidence. *Systematic Reviews* (Accepted).  
47 34  
48 34 47. What are the key processes associated to outcomes of participatory research with  
49 35 health organizations? A participatory systematic mixed studies review. NAPCRG  
50 36 annual meeting (North American Primary Care Research Group); 2013 Ottawa.  
51 37  
52 37 48. Pluye P, Nadeau N, Lehoux P. Comment favoriser la recherche clinique en  
53 38 pédopsychiatrie? Une expérience de recherche-action collaborative. *Sante Mentale*  
54 39 *Quebec* 2001;26(12):245-66.  
55 40  
56 40 49. Cargo M, Mercer S. The value and challenges of participatory research: Strengthening its  
57 41 practice. *Annu Rev Public Health* 2008;29(1):325-50.  
58 42  
59 42 50. Waterman H, Tillen D, Dickson R, et al. Action Research: A systematic review and  
60 43 guidance for assessment. *Health Technol Assess* 2001;5(23):iii-157.  
44  
45 51. Argyris C, Putnam R, Smith D. Action science : Concepts, methods, and skills for research  
and intervention. San Francisco, CA: Jossey-Bass 1985.

- 1 52. Munn-Giddings C, McVicar A, Smith L. Systematic review of the uptake and design of  
2 action research in published nursing research, 2000-2005. *J Res Nurs*  
3 2008;13(6):465-77.
- 4 53. Munten G, Van Den Bogaard J, Cox K, et al. Implementation of evidence-based practice in  
5 nursing using action research: A review. *Worldviews Evid Based Nurs* 2010;7(3):135-  
6 57.
- 7 54. Soh K, Davidson P, Leslie G, et al. Action research studies in the intensive care setting: A  
8 systematic review. *Int J Nurs Stud* 2011;48(2):258-68.
- 9 55. Davis MM, Keller S, DeVoe J, et al. Characteristics and lessons learned from practice-  
10 based research networks (PBRNs) in the United States. *J Healthc Leadersh*  
11 2012;2012(4):107-16.
- 12 56. Garson DG. Reliability analysis. Statnotes: Topics in multivariate analysis. In: Garson DG,  
13 ed. Raleigh: North Carolina State University, 2010.
- 14 57. Landis JR, Koch GG. The measurement of observer agreement for categorical data.  
15 *Biometrics* 1977;33(1):159-74.
- 16 58. Higgins J, Green S. Cochrane handbook for systematic reviews of interventions Version  
17 5.1.0 [updated March 2011]: The Cochrane Collaboration; 2011 [Available from:  
18 <http://www.cochrane-handbook.org> accessed Mar 1 2013.
- 19 59. Pace R, Pluye P, Bartlett G, et al. Testing the reliability and efficiency of the pilot Mixed  
20 Methods Appraisal Tool (MMAT) for systematic mixed studies review. *Int J Nurs Stud*  
21 2012;49(1):47-53.
- 22 60. Souto RQ, Khanassov V, Hong QN, et al. Systematic mixed studies reviews: Updating  
23 results on the reliability and efficiency of the mixed methods appraisal tool.  
24 *International journal of nursing studies* 2015;52:500-01.
- 25 61. Crowe M, Sheppard L. A review of critical appraisal tools show they lack rigor:  
26 Alternative tool structure is proposed. *J Clin Epidemiol* 2011;64(1):79-89.
- 27 62. Pluye P, Robert E, Cargo M, et al. Proposal: A mixed methods appraisal tool for  
28 systematic mixed studies reviews Department of Family Medicine, McGill University,  
29 Montreal, Canada.2011 [Available from:  
30 <http://mixedmethodsappraisaltoolpublic.pbworks.com>. Archived by WebCite® at  
31 <http://www.webcitation.org/5tTRTc9yI> accessed Feb 2 2017.
- 32 63. Popay J, Roberts H, Sowden A, et al. Guidance on the conduct of narrative synthesis in  
33 systematic reviews: Final report. Swindon: ESRC Methods Programme 2006.
- 34 64. Creswell J, Plano Clark V. Designing and conducting mixed methods research. Thousand  
35 Oaks: Sage 2010.
- 36 65. Bazeley P, Jackson K. Qualitative Data Analysis with NVivo: Colorado and University of  
37 Colorado: SAGE Publications Ltd 2013.
- 38 66. Bujold M. Nvivo: a support tool for qualitative analysis. Workshop guide. Montreal,  
39 Canada: CAQI 2016.
- 40 67. Boyatzis RE. Transforming qualitative information: Thematic analysis and code  
41 development. Thousand Oaks: Sage 1998.
- 42 68. Fereday J, Muir-Cochrane E. Demonstrating rigor using thematic analysis: A hybrid  
43 approach of inductive and deductive coding and theme development. *Int J Qual*  
44 *Methods* 2006; 5(1).
- 45 69. Sullivan P. Qualitative data analysis using a dialogical approach. London: Sage 2012.

- 1 70. Pavel S, Nolet D. Handbook of terminology. Ottawa: Minister of Public Works and  
2 Government Services Canada, 2001.
- 3 71. Rihoux B, Marx A. QCA, 25 years after “The Comparative Method”: Mapping, challenges,  
4 and innovations. *Polit Res Q* 2013;66(1):167-235.
- 5 72. Rihoux B, Ragin C. Configurational comparative methods. Thousand Oaks: Sage 2009.
- 6 73. Cochrane Effective Practice and Organisation of Care Review Group. Data collection  
7 checklist Ottawa, Canada: Cochrane Effective Practice and Organisation of Care  
8 Review Group; 2002 [Available from:  
9 [http://epoc.cochrane.org/sites/epoc.cochrane.org/files/uploads/datacollectioncheck](http://epoc.cochrane.org/sites/epoc.cochrane.org/files/uploads/datacollectionchecklist.pdf)  
10 [list.pdf](http://epoc.cochrane.org/sites/epoc.cochrane.org/files/uploads/datacollectionchecklist.pdf) accessed Feb 10 2017.
- 11 74. Neuendorf KA. The content analysis guidebook. Thousand Oaks: Sage 2002.
- 12 75. Rich E, Lipson D, Libersky J, et al. Coordinating care for adults with complex care needs  
13 in the patient-centered medical home: Challenges and solutions [White Paper].  
14 Rockville, MD: U.S. Department of Health and Human Services Agency for Healthcare  
15 Research and Quality; 2012 [updated 2012; cited 2013 Dec 12]. Available from:  
16 [http://pcmh.ahrq.gov/sites/default/files/attachments/Coordinating%20Care%20fo](http://pcmh.ahrq.gov/sites/default/files/attachments/Coordinating%20Care%20for%20Adults%20with%20Complex%20Care%20Needs.pdf)  
17 [r%20Adults%20with%20Complex%20Care%20Needs.pdf](http://pcmh.ahrq.gov/sites/default/files/attachments/Coordinating%20Care%20for%20Adults%20with%20Complex%20Care%20Needs.pdf) accessed Feb 10 2017.
- 18 76. Rich EC, Lipson D, Libersky J, et al. Organizing care for complex patients in the patient-  
19 centered medical home. *Ann Fam Med* 2012;10(1):60-62.
- 20 77. Schoen C, Osborn R, Squires D, et al. New 2011 survey of patients with complex care  
21 needs in 11 countries finds that care is often poorly coordinated. *Health Aff*  
22 2011;30(12):2437-48.
- 23 78. Hudon C, Chouinard M-C, Couture M, et al. Partners for the optimal organisation of the  
24 healthcare continuum for high users of health and social services: protocol of a  
25 developmental evaluation case study design. *BMJ open* 2014;4(12):e006991.
- 26 79. Coiera E. When conversation is better than computation. *Journal of the American*  
27 *Medical Informatics Association* 2000;7(3):277-86.
- 28 80. Beaulieu MD, Proulx M, Jobin G, et al. When is knowledge ripe for primary care? An  
29 exploratory study on the meaning of evidence. *Eval Health Prof* 2008;31(1):22-42.
- 30 81. de Bruin S, Versnel N, Lemmens L, et al. Comprehensive care programs for patients with  
31 multiple chronic conditions: A systematic literature review. *Health Policy*  
32 2012;107(2-3):108-45.
- 33 82. Kamerow D. How can we treat multiple chronic conditions? *BMJ* 2012;344(e1487).
- 34 83. Ouwens M, Wollersheim H, Hermens R, et al. Integrated care programmes for  
35 chronically ill patients: A review of systematic reviews. *Int J Qual Health Care*  
36 2005;17(2):141-46.
- 37 84. Upshur R, Tracy C. Chronicity and complexity: Facing the challenges of chronic disease  
38 in primary care. *Can Fam Physician* 2008;54(12):1655-8.
- 39 85. Stacey D, Legare F, Col NF, et al. Decision aids for people facing health treatment or  
40 screening decisions. *Cochrane Database Syst Rev* 2014(1):CD001431.
- 41 86. Starfield B, Shi L, Macinko J. Contribution of primary care to health systems and health.  
42 *Milbank Q* 2005;83(3):457-502.
- 43 87. Stacey D, Légaré F, Col N, et al. Decision aids for people facing health treatment or  
44 screening decisions. *The Cochrane Library* 2014.
- 45 88. Ministère de la santé et des services sociaux du Québec. Plan stratégique 2015-2020:  
46 Québec: Gouvernement du Québec; 2015 [Available from:

1  
2  
3  
4  
5  
6  
7  
8  
9  
10  
11  
12  
13  
14  
15  
16  
17  
18  
19  
20  
21  
22  
23  
24  
25  
26  
27  
28  
29  
30  
31  
32  
33  
34  
35  
36  
37  
38  
39  
40  
41  
42  
43  
44  
45  
46  
47  
48  
49  
50  
51  
52  
53  
54  
55  
56  
57  
58  
59  
60

1            <http://publications.msss.gouv.qc.ca/msss/fichiers/2016/16-717-01W.pdf> accessed  
2            06 June 2017.  
3

For peer review only

1  
2  
3  
4  
5  
6  
7  
8  
9  
10  
11  
12  
13  
14  
15  
16  
17  
18  
19  
20  
21  
22  
23  
24  
25  
26  
27  
28  
29  
30  
31  
32  
33  
34  
35  
36  
37  
38  
39  
40  
41  
42  
43  
44  
45  
46  
47  
48  
49  
50  
51  
52  
53  
54  
55  
56  
57  
58  
59  
60

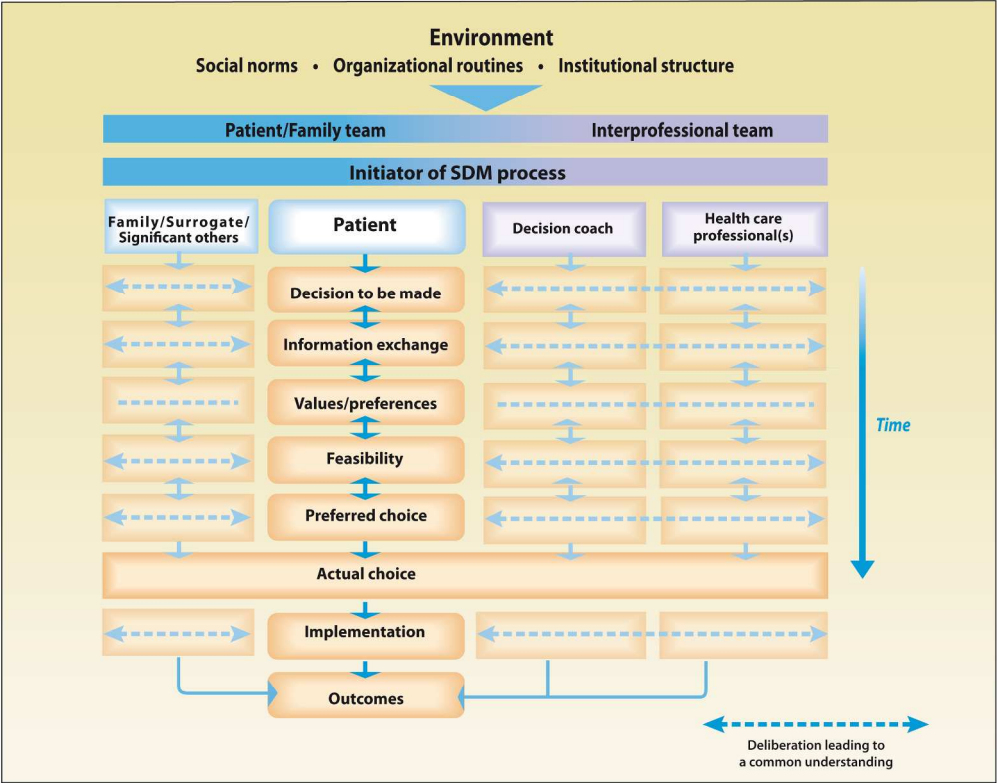

The Interprofessional Shared Decision Making (IP-SDM) model was designed to broaden the perspective of shared decision making (SDM) beyond the patient-practitioner dyad and include interprofessional (IP) teams. For more details on the IP-SDM model, please consult the following website:  
<http://www.decision.chaire.fmed.ulaval.ca/en/research/projects/interprofessional-approaches/>

231x182mm (300 x 300 DPI)

only

| Checklist | Page / Line<br>(Main document)             | Section and topic                 | Item<br>No | Checklist item ( <a href="http://www.bmj.com/content/349/bmj.g7647">http://www.bmj.com/content/349/bmj.g7647</a> )                                                                                                            |
|-----------|--------------------------------------------|-----------------------------------|------------|-------------------------------------------------------------------------------------------------------------------------------------------------------------------------------------------------------------------------------|
|           |                                            | <b>Administrative information</b> |            |                                                                                                                                                                                                                               |
|           |                                            | Title:                            |            |                                                                                                                                                                                                                               |
| ✓         | Page 1 - Line 2                            | Identification                    | 1a         | Identify the report as a protocol of a systematic review                                                                                                                                                                      |
| n/a       |                                            | Update                            | 1b         | If the protocol is for an update of a previous systematic review, identify as such                                                                                                                                            |
| ✓         | Page 3 - Lines 10-11                       | Registration                      | 2          | If registered, provide the name of the registry (such as PROSPERO) and registration number                                                                                                                                    |
|           |                                            | Authors:                          |            |                                                                                                                                                                                                                               |
| ✓         | Page 1 - Lines 4-30<br>Page 2 - Lines 1-8  | Contact                           | 3a         | Provide name, institutional affiliation, e-mail address of all protocol authors; provide physical mailing address of corresponding author                                                                                     |
| ✓         | Page 15 - Lines 9-22                       | Contributions                     | 3b         | Describe contributions of protocol authors and identify the guarantor of the review                                                                                                                                           |
| n/a       |                                            | Amendments                        | 4          | If the protocol represents an amendment of a previously completed or published protocol, identify as such and list changes; otherwise, state plan for documenting important protocol amendments                               |
|           |                                            | Support:                          |            |                                                                                                                                                                                                                               |
| ✓         | Page 15, lines 2-3 and<br>25-27            | Sources                           | 5a         | Indicate sources of financial or other support for the review                                                                                                                                                                 |
| ✓         | Page 15, lines 2-3                         | Sponsor                           | 5b         | Provide name for the review funder and/or sponsor                                                                                                                                                                             |
| ✓         | Page 15, lines 25-27                       | Role of sponsor or funder         | 5c         | Describe roles of funder(s), sponsor(s), and/or institution(s), if any, in developing the protocol                                                                                                                            |
|           |                                            | <b>Introduction</b>               |            |                                                                                                                                                                                                                               |
| ✓         | Page 4, lines 3-31 to<br>page 5, lines 1-2 | Rationale                         | 6          | Describe the rationale for the review in the context of what is already known                                                                                                                                                 |
| ✓         | Page 6, lines 29-32<br>Page 7, lines 1-5   | Objectives                        | 7          | Provide an explicit statement of the question(s) the review will address with reference to participants, interventions, comparators, and outcomes (PICO)                                                                      |
|           |                                            | <b>Methods</b>                    |            |                                                                                                                                                                                                                               |
| ✓         | Page 8, lines 13-28                        | Eligibility criteria              | 8          | Specify the study characteristics (such as PICO, study design, setting, time frame) and report characteristics (such as years considered, language, publication status) to be used as criteria for eligibility for the review |
| ✓         | Page 8, lines 1-11                         | Information sources               | 9          | Describe all intended information sources (such as electronic databases, contact with study authors, trial registers or other grey literature sources) with planned dates of coverage                                         |



|     |                                                                                           |                                    |     |                                                                                                                                                                                                                                                  |
|-----|-------------------------------------------------------------------------------------------|------------------------------------|-----|--------------------------------------------------------------------------------------------------------------------------------------------------------------------------------------------------------------------------------------------------|
| ✓   | Page 8, lines 1-31 and page 9, lines 1-10                                                 | Search strategy                    | 10  | Present draft of search strategy to be used for at least one electronic database, including planned limits, such that it could be repeated                                                                                                       |
|     |                                                                                           | Study records:                     |     |                                                                                                                                                                                                                                                  |
| ✓   | Page 8, lines 30-31 and page 9, lines 1-4                                                 | Data management                    | 11a | Describe the mechanism(s) that will be used to manage records and data throughout the review                                                                                                                                                     |
| ✓   | Page 9, lines 1-19                                                                        | Selection process                  | 11b | State the process that will be used for selecting studies (such as two independent reviewers) through each phase of the review (that is, screening, eligibility and inclusion in meta-analysis)                                                  |
| ✓   | page 10, lines 1-9                                                                        | Data collection process            | 11c | Describe planned method of extracting data from reports (such as piloting forms, done independently, in duplicate), any processes for obtaining and confirming data from investigators                                                           |
| ✓   | Page 10, lines 27-31                                                                      | Data items                         | 12  | List and define all variables for which data will be sought (such as PICO items, funding sources), any pre-planned data assumptions and simplifications                                                                                          |
| ✓   | Page 11, lines 2-7<br>Page 11, lines 29-31<br>Page 12, lines 1-5                          | Outcomes and prioritization        | 13  | List and define all outcomes for which data will be sought, including prioritization of main and additional outcomes, with rationale.                                                                                                            |
| ✓   | Page 9, 12-19                                                                             | Risk of bias in individual studies | 14  | Describe anticipated methods for assessing risk of bias of individual studies, including whether this will be done at the outcome or study level, or both; state how this information will be used in data synthesis                             |
| ✓   | Page 9, lines 21-23<br>Page 11, lines 19-27<br>Page 11, lines 29-31<br>Page 12, lines 1-5 | Data synthesis                     | 15a | Describe criteria under which study data will be quantitatively synthesised                                                                                                                                                                      |
| n/a |                                                                                           |                                    | 15b | If data are appropriate for quantitative synthesis, describe planned summary measures, methods of handling data and methods of combining data from studies, including any planned exploration of consistency (such as $I^2$ , Kendall's $\tau$ ) |
| n/a |                                                                                           |                                    | 15c | Describe any proposed additional analyses (such as sensitivity or subgroup analyses, meta-regression)                                                                                                                                            |
| ✓   | Page 10, line 18-26                                                                       |                                    | 15d | If quantitative synthesis is not appropriate, describe the type of summary planned                                                                                                                                                               |
| n/a |                                                                                           | Meta-bias(es)                      | 16  | Specify any planned assessment of meta-bias(es) (such as publication bias across studies, selective reporting within studies)                                                                                                                    |
| ✓   | Page 9, lines 12-19                                                                       | Confidence in cumulative evidence  | 17  | Describe how the strength of the body of evidence will be assessed (such as GRADE)                                                                                                                                                               |

# BMJ Open

## Decisional needs assessment of patients with complex care needs in primary care: a participatory systematic mixed studies review protocol

|                               |                                                                                                                                                                                                                                                                                                                                                                                                                                                                                                                                                                                                                                                                                                                                                                                                                                                                                                                                                                                                                                                                                                                                                                                                                                                                                                                                                                                                                                                                                                                                                                                                                                                                                                                                                                                                                                                                                                                                                                                                                                                                                                                                                                                                                                                                                                                                                                                                                                                                                                                                                                                                                                                                                                        |
|-------------------------------|--------------------------------------------------------------------------------------------------------------------------------------------------------------------------------------------------------------------------------------------------------------------------------------------------------------------------------------------------------------------------------------------------------------------------------------------------------------------------------------------------------------------------------------------------------------------------------------------------------------------------------------------------------------------------------------------------------------------------------------------------------------------------------------------------------------------------------------------------------------------------------------------------------------------------------------------------------------------------------------------------------------------------------------------------------------------------------------------------------------------------------------------------------------------------------------------------------------------------------------------------------------------------------------------------------------------------------------------------------------------------------------------------------------------------------------------------------------------------------------------------------------------------------------------------------------------------------------------------------------------------------------------------------------------------------------------------------------------------------------------------------------------------------------------------------------------------------------------------------------------------------------------------------------------------------------------------------------------------------------------------------------------------------------------------------------------------------------------------------------------------------------------------------------------------------------------------------------------------------------------------------------------------------------------------------------------------------------------------------------------------------------------------------------------------------------------------------------------------------------------------------------------------------------------------------------------------------------------------------------------------------------------------------------------------------------------------------|
| Journal:                      | <i>BMJ Open</i>                                                                                                                                                                                                                                                                                                                                                                                                                                                                                                                                                                                                                                                                                                                                                                                                                                                                                                                                                                                                                                                                                                                                                                                                                                                                                                                                                                                                                                                                                                                                                                                                                                                                                                                                                                                                                                                                                                                                                                                                                                                                                                                                                                                                                                                                                                                                                                                                                                                                                                                                                                                                                                                                                        |
| Manuscript ID                 | bmjopen-2017-016400.R2                                                                                                                                                                                                                                                                                                                                                                                                                                                                                                                                                                                                                                                                                                                                                                                                                                                                                                                                                                                                                                                                                                                                                                                                                                                                                                                                                                                                                                                                                                                                                                                                                                                                                                                                                                                                                                                                                                                                                                                                                                                                                                                                                                                                                                                                                                                                                                                                                                                                                                                                                                                                                                                                                 |
| Article Type:                 | Protocol                                                                                                                                                                                                                                                                                                                                                                                                                                                                                                                                                                                                                                                                                                                                                                                                                                                                                                                                                                                                                                                                                                                                                                                                                                                                                                                                                                                                                                                                                                                                                                                                                                                                                                                                                                                                                                                                                                                                                                                                                                                                                                                                                                                                                                                                                                                                                                                                                                                                                                                                                                                                                                                                                               |
| Date Submitted by the Author: | 28-Jul-2017                                                                                                                                                                                                                                                                                                                                                                                                                                                                                                                                                                                                                                                                                                                                                                                                                                                                                                                                                                                                                                                                                                                                                                                                                                                                                                                                                                                                                                                                                                                                                                                                                                                                                                                                                                                                                                                                                                                                                                                                                                                                                                                                                                                                                                                                                                                                                                                                                                                                                                                                                                                                                                                                                            |
| Complete List of Authors:     | <p>Bujold, Mathieu; McGill University, Department of Family Medicine<br/>         Pluye, Pierre; McGill University, Department of Family Medicine<br/>         Legare, France; Université Laval, Department of Family Medicine and<br/>         Emergency Medicine<br/>         Haggerty, Jeannie; McGill University, Department of Family Medicine<br/>         Gore, Genevieve C.; McGill University, McGill Library<br/>         El Sherif, Reem; McGill University, Department of Family Medicine<br/>         Poitras, Marie-Eve; Université Laval, Department of Family Medicine and<br/>         Emergency Medicine<br/>         Beaulieu, Marie-Claude; Université de Sherbrooke, Department of Family<br/>         Medicine<br/>         Beaulieu, Marie-Dominique; Université de Montréal, Family and Emergency<br/>         Medicine<br/>         Bush, Paula; McGill University, Department of Family Medicine<br/>         Couturier, Yves; Université de Sherbrooke, École de travail social<br/>         Debarges, Beatrice; Beatitude Patient engagement in research<br/>         Gagnon, Justin; McGill University, Department of Family Medicine<br/>         Giguère, Anik; Université Laval, Department of Family Medicine and<br/>         Emergency Medicine<br/>         Grad, Roland; McGill University, Department of Family Medicine<br/>         Granikov, Vera; McGill University, Department of Family Medicine<br/>         Goulet, Serge; Université de Sherbrooke, Department of Family Medicine<br/>         Hudon, Catherine; Université de Sherbrooke, Department of Family<br/>         Medicine<br/>         Kremer, Bernardo; Jewish General Hospital<br/>         Kroger, Edeltraut; Université Laval, Faculty of Pharmacy<br/>         Kudrina, Irina; McGill University, Department of Family Medicine<br/>         Lebouche, Bertrand; McGill University, Department of Family Medicine<br/>         Loignon, Christine; Université de Sherbrooke, Department of Family<br/>         Medicine<br/>         Lussier, Marie-Therese; Université de Montréal, Family and Emergency<br/>         Medicine<br/>         Martello, Cristiano; McGill University, Department of Family Medicine<br/>         Nguyen, Quynh; McGill University, Department of Family Medicine<br/>         Pratt, R; University of Minnesota<br/>         Rihoux, Benoit; Université catholique de Louvain, Centre de Science<br/>         Politique et de Politique Comparée<br/>         Rosenberg, Ellen; McGill University, Department of Family Medicine<br/>         Samson, Isabelle; Université Laval, Department of Family Medicine and<br/>         Emergency Medicine</p> |

1  
2  
3  
4  
5  
6  
7  
8  
9  
10  
11  
12  
13  
14  
15  
16  
17  
18  
19  
20  
21  
22  
23  
24  
25  
26  
27  
28  
29  
30  
31  
32  
33  
34  
35  
36  
37  
38  
39  
40  
41  
42  
43  
44  
45  
46  
47  
48  
49  
50  
51  
52  
53  
54  
55  
56  
57  
58  
59  
60

|                                 |                                                                                                                                                                                                                                                                                                                                                                                                                                                                                                                              |
|---------------------------------|------------------------------------------------------------------------------------------------------------------------------------------------------------------------------------------------------------------------------------------------------------------------------------------------------------------------------------------------------------------------------------------------------------------------------------------------------------------------------------------------------------------------------|
|                                 | Senn, Nicolas; Lausanne University Hospital, Department of Ambulatory Care and Community Medicine<br>Li Tang, David; McGill University, Department of Family Medicine<br>Tsujimoto, Masashi; Japan National Center for Geriatrics & Gerontology<br>Vedel, Isabelle; McGill University, Department of Family Medicine<br>Ventelou, Bruno; Aix Marseille Université , School of Economics - SESSTIM UMR 912, Inserm IRD<br>Wensing, Michel; Heidelberg University, Department of General Practice and Health Services Research |
| <b>Primary Subject Heading</b>: | Health services research                                                                                                                                                                                                                                                                                                                                                                                                                                                                                                     |
| Secondary Subject Heading:      | Patient-centred medicine                                                                                                                                                                                                                                                                                                                                                                                                                                                                                                     |
| Keywords:                       | Patients with complex care needs, Shared decision making, Interprofessional care, PRIMARY CARE                                                                                                                                                                                                                                                                                                                                                                                                                               |
|                                 |                                                                                                                                                                                                                                                                                                                                                                                                                                                                                                                              |

peer review only

SCHOLARONE™  
Manuscripts

1  
2  
3  
4  
5  
6  
7  
8  
9  
10  
11  
12  
13  
14  
15  
16  
17  
18  
19  
20  
21  
22  
23  
24  
25  
26  
27  
28  
29  
30  
31  
32  
33  
34  
35  
36  
37  
38  
39  
40  
41  
42  
43  
44  
45  
46  
47  
48  
49  
50  
51  
52  
53  
54  
55  
56  
57  
58  
59  
60

1 **Decisional needs assessment of patients with complex care needs in primary care: a**  
2 **participatory systematic mixed studies review protocol**

3  
4 Authors: Mathieu Bujold<sup>1</sup>, Pierre Pluye<sup>1</sup>, France Légaré<sup>2</sup>, Jeannie Haggerty<sup>1</sup>, Genevieve C.  
5 Gore<sup>3</sup>, Reem El Sherif<sup>1</sup>, Marie-Eve Poitras<sup>2</sup>, and the participatory review team\*

6  
7 **Participatory review team** (co-researchers, knowledge users and international experts):

8 Beaulieu, M-C.<sup>4</sup>, Beaulieu, M-D.<sup>5</sup>, Bush, P.L.<sup>1</sup>, Couturier, Y.<sup>6</sup>, Débarges, B.<sup>7</sup>, Gagnon, J.<sup>1</sup>,  
9 Giguère, A.<sup>2</sup>, Grad, R.<sup>1</sup>, Granikov, V.<sup>1</sup>, Goulet, S.<sup>4</sup>, Hudon, C.<sup>4</sup>, Kremer, B.<sup>8</sup>, Kröger, E.<sup>9</sup>,  
10 Kudrina, I.<sup>1</sup>, Lebouché, B.<sup>1</sup>, Loignon, C.<sup>4</sup>, Lussier, M-T.<sup>5</sup>, Martello, C.<sup>1</sup>, Nguyen, Q.<sup>1</sup>, Pratt, R.<sup>10</sup>,  
11 Rihoux, B.<sup>11</sup>, Rosenberg, E.<sup>1</sup>, Samson, I.<sup>2</sup>, Senn N.<sup>12</sup>, Tang, D.<sup>1</sup>, Tsujimoto, M.<sup>13</sup>, Vedel, I.<sup>1</sup>,  
12 Ventelou, B.<sup>14</sup>, Wensing, M.<sup>15</sup>

13  
14 **Affiliations**

15 1 Department of Family Medicine, McGill University, Montreal, Canada

16 2 Department of Family Medicine and Emergency Medicine, Université Laval, Quebec, Canada

17 3 McGill Library, McGill University, Montreal, Canada

18 4 Department of Family Medicine, Université de Sherbrooke, Canada

19 5 Family and Emergency Medicine, Université de Montréal, Canada

20 6 École de travail social, Université de Sherbrooke, Canada

21 7 Beatitude Patient engagement in research, Sherbrooke, Canada

22 8 Jewish General Hospital, Montreal, Canada

23 9 Faculty of Pharmacy, Université Laval, Québec, Canada

24 10 Department of Family Medicine and Community Health, University of Minnesota,  
25 Minneapolis, United States

26 11 Centre de Science Politique et de Politique Comparée, Université catholique de Louvain,  
27 Belgique

28 12 Université de Lausanne, Switzerland

29 13 Japan National Center for Geriatrics & Gerontology, Obu City, Japan

30 14 Université d'Aix-Marseille, France

1  
2  
3 1 15 Department of General Practice and Health Services Research, Heidelberg University,  
4  
5 2 Germany

6  
7 3 **Corresponding author**

8  
9 4 Mathieu Bujold, PhD, MA, MSc  
10  
11 5 Post-doctoral researcher, Quebec SPOR SUPPORT Unit  
12  
13 6 Department of Family Medicine, McGill University  
14  
15 7 5858 Cote-des-Neiges, 3rd Floor, Suite 300, Montreal, QC, H3S 1Z1  
16  
17 8 [mathieu.bujold@mcgill.ca](mailto:mathieu.bujold@mcgill.ca)  
18  
19 9

20 10 **Abstract**

21 11 INTRODUCTION

22  
23 12 Patients with complex care needs (PCCNs) often suffer from combinations of multiple chronic  
24  
25 13 conditions, mental health problems, drug interactions and social vulnerability, which can lead to  
26  
27 14 health care services overuse, underuse or misuse. Typically, PCCNs face interactional issues and  
28  
29 15 unmet decisional needs regarding possible options in a cascade of interrelated decisions involving  
30  
31 16 different stakeholders (themselves, their families, their caregivers, their health care practitioners).  
32  
33 17 Gaps in knowledge, values clarification and social support in situations where options need to be  
34  
35 18 deliberated hamper effective decision support interventions. This review aims to: (1) assess  
36  
37 19 decisional needs of PCCNs from the perspective of stakeholders; (2) build a taxonomy of these  
38  
39 20 decisional needs; and (3) prioritize decisional needs with knowledges users (clinicians, patients  
40  
41 21 and managers).  
42

43 22  
44 23 METHODS AND ANALYSIS

45  
46 24 This review will be based on the Interprofessional Shared Decision Making (IP-SDM) model and  
47  
48 25 the Ottawa Decision Support Framework. Applying a participatory research approach, we will  
49  
50 26 identify potentially relevant studies through a comprehensive literature search; select relevant  
51  
52 27 ones using eligibility criteria inspired from our previous scoping review on PCCNs; appraise  
53  
54 28 quality using the Mixed Methods Appraisal Tool; conduct a 3-step synthesis (sequential  
55  
56 29 exploratory mixed methods design) to build taxonomy of key decisional needs; and integrate  
57  
58 30 these results with those of a parallel PCCNs' qualitative decisional need assessment (semi-  
59  
60 31 structured interviews and focus group with stakeholders).

## 1 ETHICS AND DISSEMINATION

2 This systematic review, together with the qualitative study (approved by the CIUSSS-SLSJ  
3 ethical committee), will produce a working taxonomy of key decisional needs (ontological  
4 contribution), to inform the subsequent user-centered design of a support tool for addressing  
5 PCCNs' decisional needs (practical contribution). We will adapt the IP-SDM model, normally  
6 dealing with a single decision, for PCCNs who experience cascade of decisions involving  
7 different stakeholders (theoretical contribution). Knowledge users will facilitate dissemination of  
8 the results in the Canadian primary care network.

9  
10 **Trial registration number:** Our protocol is registered with PROSPERO (registration number  
11 CRD42015020558).

### 12 **Strengths and limitations of this study**

- 14 • This work will be conducted with a participatory research approach involving multiple  
15 knowledge users', including patients' perspectives.
- 16 • Large team governance can be an issue; thus, an executive task force will carry out the  
17 review.
- 18 • The studies heterogeneity challenge will be raised by using an innovative mixed methods  
19 design 3-step synthesis to build a taxonomy presenting various key decisional needs  
20 configuration.

## 1 Introduction

### 3 Rationale for the review

5 Community-based primary health care (hereafter, primary care) plays a key role regarding  
6 situations of complex care needs<sup>1-3</sup>. Patients with complex care needs (PCCNs) often suffer from  
7 combinations of multiple chronic conditions, mental health problems, drug interactions and social  
8 vulnerability, which can lead to health care services overuse, underuse or misuse<sup>1 4 5</sup>. However,  
9 this does not fully capture the complex care needs experience that encompasses individual  
10 (patient and practitioner), interpersonal (patient-practitioner or interprofessional), organizational  
11 (e.g., resources), and socio-cultural characteristics (e.g., values)<sup>4 6-8</sup>. Typically, PCCNs face  
12 interactional issues related to personal uncertainty or disagreements regarding possible options  
13 (decisional conflict) and unmet decisional needs (e.g., knowledge acquisition, clarification of  
14 values and preferences, support, and resources). The complexity of decision-making could be  
15 exacerbated by a cascade of interrelated decisions involving different stakeholders (PCCNs, their  
16 families, their caregivers, their health care practitioners, etc.). Gaps in knowledge, values  
17 clarification and social support in these situations where multiple options need to be deliberated  
18 (decisional needs) hamper decision support interventions.

20 In a quality improvement process, a group of health and social primary care practitioners, patients  
21 and researchers from Practice Based Research Networks (PBRNs) identified the necessity to  
22 better understand PCCNs' decisional needs. Team members contributed to a pilot project that  
23 sought to identify characteristics of PCCNs and possible support interventions<sup>9 10</sup>. A case series<sup>9</sup>  
24 and a scoping review<sup>10</sup> revealed that interprofessional coordination of care and lack of  
25 stakeholders' agreement are two major issues affecting this population. It is necessary to better  
26 understand the decisional needs of PCCNs associated with mismatched knowledge, expectations,  
27 personal values, as well as social support related to a variety of personal, socio-cultural and  
28 clinical characteristics. Three individual evaluation tools of complex care needs<sup>11-13</sup> and one  
29 study about patient preference in the context of multi-morbidity were identified<sup>14 15</sup>. In the  
30 literature, we found no tool to facilitate shared decision making between PCCNs, their families  
31 and caregivers, and health care providers. Thus, our target population, PCCNs, may benefit from

1  
2  
3 1 a decisional needs assessment to inform the design of an interprofessional shared decision  
4  
5 2 making tool that accounts for their knowledge, values and preferences<sup>16</sup>.

### 3 **Interprofessional Shared Decision Making (IP-SDM) model**

4  
5 Shared Decision Making (SDM) is a process where one patient and one health professional work  
6 together to make a healthcare choice; it is essential for informed consent and patient centred care  
7 <sup>17-22</sup>. Industrialised countries such as Australia<sup>23</sup>, UK<sup>24</sup> and USA<sup>25</sup> are currently implementing  
8 large SDM initiatives. SDM is an effective decision making process when careful deliberation is  
9 needed to address uncertainties inherent to evidence-based medicine, and to weigh the risks and  
10 benefits of patients' healthcare choices (based on their values and preferences). Many factors  
11 may influence the choices individuals make and the roles they attribute to others and to  
12 themselves in the context of interprofessional care <sup>26-29</sup>, which justifies framing this review with  
13 the Interprofessional Shared Decision Making (IP-SDM) model <sup>30</sup>.

14  
15 The IP-SDM model extends the SDM beyond the patient-health professional dyad to  
16 interprofessional (IP) teams <sup>30-32</sup>. In addition to its interprofessional component, this model  
17 proposes to include family members and potential caregivers in a patient-centered process  
18 (Figure 1). This model aims to stimulate deliberation and reach a common understanding among  
19 patients, family/surrogate/significant others, decision coaches, and health care professionals. The  
20 IP-SDM model follows a patient-centered step by step process: (1) choose a decision to make and  
21 explore related options; (2) exchange information; (3) clarify values and preferences; (4) assess  
22 the feasibility of the decision; (5) choose the preferred decision option; (6) implement the  
23 decision; (7) assess the outcome. Based on the IP-SDM model interventions have been developed  
24 for specific decision-making situations. For example, a study is currently under way to scale up  
25 and evaluate the implementation of IP-SDM intervention for frail elderly clients or their  
26 caregivers facing a decision about staying at home or moving elsewhere <sup>33 34</sup>. The IP-SDM also  
27 takes into account the environmental complexity in which the SDM takes place (socio-cultural  
28 norm, organizational routines, and institutional structure). This model is particularly relevant to  
29 help IP teams respond to decisional needs of PCCNs as it helps the stakeholders reach informed  
30 value-based decisions <sup>30 31 35</sup>. Typically, the IPSDM is used for one decision. We will be the first



1  
2  
3 1 team to adapt this model for PCCNs who experience complex interrelated decisions involving  
4 2 different stakeholders with various opinions.  
5  
6  
7 3

#### 8 4 **Decisional needs assessment**

9  
10 5 A decisional need is usually derived from a needs assessment that addresses or focuses on a  
11 6 situation where multiple options need to be deliberated. Assessing decisional needs is needed in  
12 7 order to elaborate effective decision support, even more so when an interprofessional team is  
13 8 required to provide decision support to a patient. A decisional needs assessment is particularly  
14 9 relevant for PCCNs, such as prioritizing a cascade of complex decisions that involve multiple  
15 10 stakeholders. Decision support interventions address stakeholders' decisional needs (decisional  
16 11 conflict, lack of knowledge and information exchange, values, expectation and preferences  
17 12 clarification, support and resource). Indeed, unmet decisional needs affects the decision quality  
18 13 (e.g., uninformed, incongruent with values and unsupported socially). This in turn may affect  
19 14 behaviour (e.g., uptake and maintenance of the chosen option), lead to negative emotions (e.g.,  
20 15 decision regret) and impact health care use (e.g., overuse, underuse and misuse). The Ottawa  
21 16 Decision Support Framework (ODSF) informs the conduct of the decisional needs assessment<sup>36</sup>  
22 17<sup>37</sup>.  
23  
24  
25  
26  
27  
28  
29  
30  
31  
32

33 18  
34 19 The decisional needs assessment for PCCNs will answers the following questions: What are the  
35 20 types of decisions have to make complex care needs situations? Which decisions are most  
36 21 frequent? Which decisions are the most difficult to make and why? How these decisions are  
37 22 interrelated? Who are the stakeholders involved in the decision? What is needed to better support  
38 23 regarding the interprofessional shared decision making process (e.g., information, values  
39 24 clarification, social support or else)? What is currently being done? What are the barriers and  
40 25 facilitators for applying this decision support? Several strategies could be mobilized to assess  
41 26 decisional needs of a population<sup>16 38</sup>. One of them consists to review the existing information (i.e.  
42 27 previous studies)<sup>16</sup>.  
43  
44  
45  
46  
47  
48  
49  
50  
51  
52

#### 52 29 **Review question and objectives**

53  
54 30 Our overall review question is: What are, from the perspective of stakeholders, the key decisional  
55 31 needs of patients with complex care needs (PCCNs)? In line with the Knowledge Translation  
56 32 (KT) cycle<sup>39</sup>, the purpose of our systematic review is to provide the needed groundwork to assess  
57  
58  
59  
60

- 1  
2  
3 1 decisional needs of PCCNs. With a task force and a multidisciplinary team including researchers  
4 and knowledge users in community-based primary health care (see table 1), this review aims to:  
5  
6 (1) Assess decisional needs of PCCNs from the perspective of stakeholders;  
7  
8 (2) Build a taxonomy of these decisional needs;  
9  
10 (3) Prioritize decisional needs with knowledges users (clinicians, patients, managers).  
11  
12  
13

## 14 **Methods**

15 This review will use a multipronged approach. First, we will conduct a systematic mixed studies  
16 review (including qualitative, quantitative and mixed methods studies)<sup>40</sup>. Mixed studies reviews  
17 provide a rich and highly practical understanding of complex health issues<sup>41-46</sup>. Second, we will  
18 use an organizational participatory research approach, involving researchers and knowledge users  
19 (clinicians, patients, managers), to determine key decisional needs.  
20  
21  
22  
23  
24  
25

26 We will, thus, blend research with action using a number of iterative cycles, thereby producing  
27 knowledge that can inform healthcare practices<sup>47-50</sup>. Organizational participatory research  
28 consists of doing research with patients and practitioners, rather than on them; it is a strategy for  
29 organizational change and practice improvement<sup>50-54</sup>. It also supports the idea of producing  
30 knowledge that respond to the needs and perspectives of the knowledge users rather than  
31 producing knowledge to which they need to adapt. This approach is suitable for this review as the  
32 pilot project emerged from practice. A multidisciplinary team blending scientific and practical  
33 knowledge is necessary to achieve our objectives (table 1). Team members are researchers with  
34 various expertise, and knowledge users (directors and clinicians, patients and managers of the  
35 four Quebec network of Practice Based Research Networks (PBRN)<sup>55</sup> and the Quebec SPOR  
36 SUPPORT Unit (SPOR standing for Strategy for Patient Oriented Research). In partnership with  
37 knowledge users, we will systematically search, identify, select, appraise, and synthesize  
38 qualitative and quantitative evidence. An executive task force will lead the review and mobilize  
39 the participatory review team (knowledge users, co-researchers, patient experts, and international  
40 experts).  
41  
42  
43  
44  
45  
46  
47  
48  
49  
50  
51  
52

53 29

54 30

55 31

56

57

58

59

60

## 1 **Information sources and search strategy**

2 Building on our previous work <sup>9 10</sup>, the concept map and the search strategy (see table 2) was  
3 written and tested in collaboration with specialized librarians. Based on the scoping review <sup>9</sup>, we  
4 anticipate retrieving about 4500 potentially relevant database records (authors, title, source,  
5 abstract) in MEDLINE (Ovid), Embase (Ovid), PsycINFO (Ovid), CINAHL (EBSCOhost) and  
6 Social Sciences Citation Index (SSCI). No search date limit will be used. In addition, our  
7 librarians will provide guidance in searching the grey literature using Google Scholar,  
8 Conference Proceedings Citation Index-Science (CPCI-S) and specialized websites. After the  
9 selection stage, other potentially relevant records will be sought by tracking citations of included  
10 studies using Scopus, up to saturation (no additional studies found). Our team members,  
11 including knowledge users, will be emailed to request additional records or bibliographies.

12

## 13 **Eligibility criteria and identification of potentially relevant studies**

14 Eligibility criteria will be based upon the previous scoping reviews on PCCNs <sup>10</sup> with a focus on  
15 interactional and decisional issues. A study will be included if it is a French, English, or Spanish  
16 language empirical study about:

- 17 (1) Patients with complex care needs (any study dealing directly or indirectly with PCCNs or a  
18 population with at least one of the following characteristics: multiple chronic conditions;  
19 mental health issues; drug interactions; social vulnerability; or health care services overuse,  
20 underuse and misuse);
- 21 (2) Primary health care setting (any study dealing directly with primary health care setting or  
22 indirectly, e.g., links between primary care and secondary or tertiary care setting)
- 23 (3) Interpersonal relationships (reciprocal interaction of two or more persons, e.g.,  
24 interprofessional, or professional-patient, patient-family or professional-family);
- 25 (4) Decisional needs (frequent or difficult decisions regarding situations where multiple options  
26 are possible, factors affecting the decision making process, decisional conflict, support and  
27 resources used or needed to improve decision quality, barriers and facilitators to using  
28 decision supports).

29

30 We expect to identify about 300 potentially relevant studies. We will use EndNote (reference  
31 management software) to remove duplicates and store records with indexing terms. For each

32

33

34

35

36

1  
2  
3 1 record, two reviewers will independently assign codes according to our eligibility criteria using  
4  
5 2 specialized software (DistillerSR). For each code, we will measure the agreement between  
6  
7 3 reviewers (kappa)<sup>56 57</sup>. When reviewers disagree, the record will be included in the following  
8  
9 4 selection process.

### 10 11 12 6 **Selection of relevant studies (coding full-text documents)**

13  
14 7 We anticipate including 150 relevant studies as follows. The two reviewers will independently  
15  
16 8 code each full text paper identified in the previous step. As with identification, inter-reviewer  
17  
18 9 agreement will be measured. Disagreements that are not resolved easily will be referred to a third  
19  
20 10 party<sup>58</sup>.

### 21 22 23 12 **Critical appraisal of included studies**

24  
25 13 Critical appraisal is a core component of systematic reviews<sup>39 58</sup>. It provides a rationale to break  
26  
27 14 down the synthesis of included studies by level of quality. We will use the Mixed Methods  
28  
29 15 Appraisal Tool (MMAT)<sup>42 59 60</sup>, a unique validated tool for critically appraising the quality of  
30  
31 16 qualitative, quantitative and mixed methods studies in systematic mixed studies reviews<sup>61</sup>. Using  
32  
33 17 the 2011 version of the MMAT<sup>62</sup> appraisal form and user-manual, two reviewers will  
34  
35 18 independently appraise included studies. As with selection, inter-reviewer agreement will be  
36  
37 19 measured, and disagreements resolved.

### 38 39 21 **Synthesis design**

40  
41 22 Included studies will be described in a summary table<sup>58 61 63</sup>. Then, guided by a sequential mixed  
42  
43 23 methods design<sup>40 46 64</sup>, we will conduct a 3-step synthesis.

44  
45  
46 25 Step 1: Objective 1 -Assess decisional needs of PCCNs from the perspective of stakeholders

47  
48 26 For each included study, two reviewers will independently list decisional needs using a  
49  
50 27 deductive/inductive qualitative thematic analysis with specialized software (NVivo 11)<sup>65-68</sup>. For  
51  
52 28 each decisional need (e.g., goal setting), type of stakeholder (e.g. patient), the facilitators (e.g.,  
53  
54 29 interpreter) and barriers (e.g., language) influencing the decision will be listed, including  
55  
56 30 stakeholders' information needs (e.g., list of option with their, respective, potential benefits and  
57  
58 31 harms), values, preferences and sources of support.

1  
2  
3 1 Data extraction: A hybrid thematic analysis (deductive/inductive) will be used. All articles will  
4  
5 2 be coded using predefined themes (codebook) derived from the IP-SDM model and the ODSF  
6  
7 3 (framework for decisional needs assessment)<sup>38</sup>, as well as themes suggested by the data; thus,  
8  
9 4 creating an inventory of decisional needs and their facilitators and barriers. All team members,  
10  
11 5 including knowledge users, will have the opportunity to discuss and refine the code book during  
12  
13 6 online workshops with the executive task force. Consistency and rigor will be ensured via a  
14  
15 7 process of combining interpretations and dialogues<sup>67 69</sup>. Executive task force team members will  
16  
17 8 examine the inventory and written interpretations, and ask the reviewers to explain strengths and  
18  
19 9 limitations of their interpretations (trustworthiness) and to suggest alternative interpretations.  
20

21 10  
22 11 A comparative analysis will be conducted to explore similarities/differences among stakeholders'  
23  
24 12 perspectives. Using NVivo 11, the qualitative data (excerpt of the selected studies) will be  
25  
26 13 assigned to the following 'type of stakeholder' attribute value: patients, family, caregivers,  
27  
28 14 practitioners, others. This will allow us, for example, to compare the perceptions that patients  
29  
30 15 have of their decisional needs with those of practitioners. We will also assign other categories of  
31  
32 16 attributes (e.g., types of practitioners) to the data.  
33

34 17  
35 18 Data synthesis: A summary table of the analysis will be made by systematically noting the  
36  
37 19 following for all decisional needs: label, definition, type of stakeholder, facilitators that simplify  
38  
39 20 patients' decisions, barriers that make decisions difficult with patients, key excerpts of articles  
40  
41 21 broken down by decisional need (illustrative examples). The summary table will be posted on our  
42  
43 22 review blog, and the team members (researchers and knowledge users) will provide feedback.  
44  
45 23 Given the feedback, some of the decisional needs will be revised, and modifications will be  
46  
47 24 discussed. Then, a harmonization of themes will be conducted<sup>70</sup>. For each term, the usage will be  
48  
49 25 confirmed in reference to documents on decision making (distinguishing accurate from improper  
50  
51 26 usage), and accurate usages will be adopted to avoid ambiguity.  
52

53 27  
54 28 Step 2: Objective 2 – Build a taxonomy of decisional needs

55 29 The Configurational Comparative Method (CCM) is a case-based analysis useful for building  
56  
57 30 taxonomies<sup>71 72</sup>. For this review, each included study will be a case. Using CCM, we will  
58  
59 31 determine commonalities in the relationships between decisional needs, their facilitators and  
60

1 barriers. We will use CCM to test relationships between decision-related variables using Boolean  
2 algebra. The main steps of a CCM analysis are: defining conditions and outcomes, extracting  
3 data, preparing a truth table (cases in row, and conditions and outcome in columns), performing  
4 data minimization with specialized software (QCA-GUI), and interpreting results. CCM is  
5 appropriate for two reasons: the theory-driven approach (IP-SDM) and the heterogeneity of study  
6 designs. The conditions and outcomes will be determined following the qualitative synthesis of  
7 the included studies.

8  
9 Data extraction: We will use a data extraction form to ensure a systematic process<sup>73</sup>. Then, we  
10 will conduct a quantitative content analysis<sup>74</sup>. The codebook will contain categories listed in  
11 step-one (deductive coding), and will be tested by two coders using a random sample of 10% of  
12 our cases (studies). For each case, the two coders will independently assign text excerpts to codes  
13 (variables and values). This will produce a table of raw data. Inter-coder agreement will be  
14 measured (kappa). Disagreements that are not resolved easily will be referred to a third party. For  
15 each code with less than substantial agreement ( $\text{kappa} < 0.61$ )<sup>57</sup>, the codebook will be revised  
16 (label, definition and key extracts) and an additional random sample of cases (10%) will be  
17 coded.

18  
19 Data synthesis: Data will be discussed by executive task force members, to produce a table of  
20 binary variables with cases in rows and variables in columns. Then, we will conduct the CCM<sup>71</sup>  
21<sup>72</sup>, group similar cases in sets, and produce a table of configurations of decisional needs (sets in  
22 rows, variables in columns). Results will be interpreted by going back and forth between  
23 configurations and cases. The configurations will allow us to ‘pose more focused questions’ on  
24 the cases<sup>72</sup>. Configurations of decisional needs and interpretations will be reviewed. The  
25 configurations of decisional needs will be posted on the blog, and feedback provided by the team  
26 members. Discrepancies that are not resolved easily will be referred to a third party. The  
27 synthesis will produce a comprehensive taxonomy of decisional needs for PCCNs.

28  
29 Step 3: Objective 3 - Determine key decisional needs

30 The taxonomy will be discussed in half-day workshops with team members, and a penultimate  
31 taxonomy will be posted on the blog. Then, the importance of decisional needs (taxonomy

1  
2  
3 1 elements) will be rated by the team members with a blog-embedded web-questionnaire and a 5-  
4 2 item Likert scale (from ‘not important at all’ to ‘extremely important’). Discrepancies (e.g., a  
5 3 need with a variety of ratings from low to high importance) that are not resolved easily will be  
6 4 referred to a third party. This will produce a taxonomy of key decisional needs, facilitators and  
7 5 barriers.  
8  
9 6

10 7 The taxonomy will be compared and integrated with the results of a parallel qualitative decisional  
11 8 need assessment of PCCNs that is part of the provincial “Demonstration project” of the Quebec  
12 9 SPOR SUPPORT Unit funded by CIHR (Canadian Institutes of Health Research), Quebec  
13 10 Ministry of Health and FRQS (Quebec Research Fund). In this parallel qualitative study,  
14 11 conducted by co-authors of this review, semi-structured interviews and focus group will be done  
15 12 with patients/relatives, health and social primary care practitioners and decision makers to  
16 13 empirically assess decisional needs of PCCNs. This qualitative study will involve four expert  
17 14 patients, including one who is participating in all stages of the systematic review. The qualitative  
18 15 decisional need assessment and this systematic review will be done concurrently to validate  
19 16 emerging decisional needs. This will give a deeper and broader understanding to better inform the  
20 17 subsequent user-centered design of an IP-SDM support tool.  
21  
22  
23  
24  
25  
26  
27  
28  
29  
30  
31  
32  
33  
34

### 35 19 **Ethics and dissemination**

36 20  
37 21 Patients with complex care needs (PCCNs) are associated with unmet health care needs, overuse,  
38 22 underuse or misuse of health care services, low quality of care, and increased costs of health  
39 23 systems<sup>75-77</sup>. Given the aging population and rising rates of chronic disease, the number of  
40 24 PCCNs is growing<sup>2,5,78</sup>. This systematic review, together with the parallel qualitative study, will  
41 25 contribute to the assessment of decisional needs of PCCNs from the perspective of stakeholders  
42 26 (substantive contribution). The qualitative study was approved by the scientific and ethical  
43 27 committee of the “*Centre Intégré Universitaire de Santé et Service Sociaux du Saguenay-Lac-*  
44 28 *Saint-Jean*” (Integrated University Centre of Health and Social Services). The ultimate result of  
45 29 this work will be a working taxonomy of key decisional needs of PCCNs (ontological  
46 30 contribution). We will adapt the IP-SDM model, normally dealing with a single decision, for  
47 31 PCCNs who experience a cascade of complex interrelated decisions involving different  
48 32 stakeholders with various opinions (theoretical contribution). The taxonomy of key decisional  
49  
50  
51  
52  
53  
54  
55  
56  
57  
58  
59  
60

1 needs will inform the subsequent user-centered design an IP-SDM support tool (practical  
2 contribution). This tool will frame PCCNs' decisional needs, help stakeholders prioritize  
3 decisions and understand options and PCCNs' goals, and facilitate finding a common ground  
4 crucial for improving patient-practitioner and interprofessional interactions, quality of decisions  
5 and care <sup>79</sup>.

6  
7 This systematic review will help bridge two knowledge gaps: on the one hand, the majority of  
8 intervention studies address simple care needs rather than complex ones; on the other hand,  
9 current systematic reviews typically focus on one condition and one homogeneous population <sup>80-</sup>  
10 <sup>84</sup>. The studies' heterogeneity challenge will be addressed by using an innovative mixed methods  
11 design 3-step synthesis to build a taxonomy presenting various key decisional needs'  
12 configurations.

13  
14 Previous studies showed that PCCNs are typically facing interactional issues, which justifies  
15 framing this proposal within the IP-SDM model. Evidence shows that SDM support tools  
16 improve patient-practitioner interactions and decision quality, and reduce ineffective care <sup>3 85-87</sup>.  
17 However, we know of no decision support tool that could facilitate shared decision making  
18 between PCCNs and multiple professionals. One contribution of this review will be to enhance  
19 decision support for these patients.

20  
21 As with all systematic reviews, due to publication bias, this work will be biased toward positive  
22 results and runs a risk of conflating pre-determined outcomes that were identified by authors of  
23 the studies with the decisional needs of PCCNs. This limitation will be reduced by validating the  
24 results with the knowledge users (clinicians, patients and managers) and the qualitative results of  
25 the Demonstration project of the Quebec SPOR SUPPORT Unit).

26  
27 This review emerged from two Quebec PBRN pilot work, addresses an important issue for  
28 knowledges users and is a priority of the Quebec Ministry of Health <sup>88</sup>. In line with Canadian  
29 Institutes for Health Research (CIHR) priorities<sup>1</sup>, patients' perspectives will be included in this

---

<sup>1</sup> <http://www.cihr-irsc.gc.ca/e/193.html>



1  
2  
3 1 review given our organizational participatory research approach and our user-centered design.  
4  
5 2 Diffusion will involve raising general awareness about our results through conference  
6  
7 3 presentations and publications. Dissemination, a more active and targeted strategy, will consist of  
8  
9 4 reaching other knowledge users through websites, listservs, and peer networks through Quebec  
10  
11 5 PBRNs and the Canadian SPOR networks.  
12  
13 6

## 7 **SYSTEMATIC REVIEW STATUS**

15 8 The review is currently in the protocol and search strategy updating phase. We are testing the  
16  
17 9 search strategy in Ovid MEDLINE (2017/02/06). We expect to complete the selection of relevant  
18  
19 10 studies in 2017 and design the first version of the IP-SDM support tool in 2018.  
20  
21 11

## 22 **ABBREVIATIONS**

- 24 13 • CIHR : Canadian Institutes of Health Research
- 25  
26 14 • CIUSSS-SLST : *Centre Intégré Universitaire de Santé et Service Sociaux du Saguenay-Lac-*  
27  
28 15 *Saint-Jean* (Integrated University Centre of Health and Social Services).
- 29  
30 16 • FRQS: Fond de recherche du Québec – Santé
- 31  
32 17 • IP-SDM: Interprofessional Shared Decision Making
- 33  
34 18 • KT: Knowledge Translation
- 35  
36 19 • ODSF: Ottawa Decision Support Framework
- 37  
38 20 • PCCNs : Patients with complex care needs
- 39  
40 21 • PBRN: Practice Based Research Network
- 41  
42 22 • SPOR: CIHR Strategy for Patient Oriented Research

## 44 **KEY TERMS**

- 45  
46 24
- 47 25 • KNOWLEDGE USERS: The directors and the members (clinicians, patients, managers) of the  
48  
49 26 four Quebec PBRNs and the Quebec SPOR SUPPORT Unit.
- 50  
51 27 • TEAM MEMBERS: all co-authors (knowledge users and researchers) and collaborators (see  
52  
53 28 acknowledgements).
- 54  
55 29 • PRIMARY CARE: Community based primary health care.
- 56  
57 30 • STAKEHOLDERS: Patients with complex care needs, their families, their caregivers, their  
58  
59 31 health care practitioners or any other people involved in decisions-making related to their  
60

1  
2  
3 1 complex care needs (e.g. surrogate, significant others, case manager, decision coach, navigator,  
4 mediator, interpreter).  
5  
6  
7  
8

#### 9 **ACKNOWLEDGEMENTS**

10 The preparation of this protocol was supported by the Quebec SPOR SUPPORT Unit and funded  
11 by the Canadian Institutes of Health Research (CIHR). Pierre Pluye holds a salary award from the  
12 Fonds de recherche du Québec – Santé (FRQS). Authors gratefully acknowledge and the  
13 following collaborators: Magali Bigras and Alain Boulet, *Centre de santé et de services sociaux*  
14 de Gatineau, Canada ; Lynn R. McLauchlin, St. Mary's Hospital Center, Montreal, Canada; Silvia  
15 Duong, Jewish General Hospital, Montreal, Canada; and Fanny Hersson, Department of Family  
16 Medicine, McGill University, Canada).  
17  
18  
19  
20  
21  
22  
23  
24

#### 25 **AUTHOR CONTRIBUTIONS**

26  
27 14 PP, FL and MB conceived and designed the review with input from all team members. MB  
28 drafted the manuscript. All authors (MB, PP, FL, JH, GG, RES, MEP, MCB, MDB, PLB, YC,  
29 BD, JG, AG, RG, VG, SG, CH, BK, EK, IK, BL, CL, MTL, CM, QN, RP, BR, ER, IS, NS, DT,  
30 MT, IV, BV, MW) read, critically revised, and approved the final manuscript and will participate  
31 to workshops. Executive task force are (MB, PP, RES). Team members are (i) knowledge users  
32 (JH, MCB, MDB, BD, BK, IK, MTL, CM, ER, IS, NS, RG, SG); (ii) co-researchers (FL, GG,  
33 MEP, PLB, YC, JG, AG, VG, CH, EK, BL, CL, QN, RP, BR, DT, MT, IV, BV, MW, BPL, CY,  
34 GA); (iii) international experts (RB, RP, NS, MT, BV, MW). The executive team is doing the  
35 bulk of the work. GG participated intensively in the systematic search strategy planning and  
36 operationalisation. The authors of this systematic review who are also involved in the qualitative  
37 decisional need assessment study are MEP, FL (co-leaders), MB, CH, PP (co-researchers) and  
38 BD, MDB (knowledge users).  
39  
40  
41  
42  
43  
44  
45  
46  
47  
48  
49

#### 50 **FUNDING STATEMENT**

51 This work is funded by the Canadian Institutes for Health Research (CIHR) grant number 2016  
52 30KRS-367087. CIHR had no role in the development of this protocol.  
53  
54  
55  
56

#### 57 **COMPETING INTERESTS**

1  
2  
3  
4  
5  
6  
7  
8  
9  
10  
11  
12  
13  
14  
15  
16  
17  
18  
19  
20  
21  
22  
23  
24  
25  
26  
27  
28  
29  
30  
31  
32  
33  
34  
35  
36  
37  
38  
39  
40  
41  
42  
43  
44  
45  
46  
47  
48  
49  
50  
51  
52  
53  
54  
55  
56  
57  
58  
59  
60

1 The authors declare no competing interests.

For peer review only

**Table 1 The multidisciplinary expertise of the research team and collaborators**

| <b>EXPERTISE</b>                              | <b>NAMES*</b>                                                                                                                                                                                                                                                                                                                                              | <b>N</b> |
|-----------------------------------------------|------------------------------------------------------------------------------------------------------------------------------------------------------------------------------------------------------------------------------------------------------------------------------------------------------------------------------------------------------------|----------|
| Home health care                              | Beaulieu, M-C.; Duong, S.; Kremer, B.; Poitras, M-E.                                                                                                                                                                                                                                                                                                       | 4        |
| Interprofessional / Integrated care           | Beaulieu, M-C.; Bujold, M.; Couturier, Y.; Haggerty, J.; Légaré, F.; Poitras, M-E.; Vedel, I.                                                                                                                                                                                                                                                              | 7        |
| Knowledge transfer and participatory research | Bigras, M.; Boulet, A.; Bujold, M.; Bush, P.L.; Duong, S.; Giguere, A.; Grad, R.; Goulet, S.; Granikov, V.; Haggerty, J.; Kremer, B.; Kroger, E.; Légaré, F.; Lussier, M-T.; Martello, C.; Pluye, P.; Pratt, R.; McLauchlin, L.R.; Samson, I.; Senn, N.; Tsujimoto, M.; Ventelou, B.; Vedel, I.; Wensing, M.                                               | 24       |
| Patients with complex care needs              | Bigras, M.; Boulet, A.; Bujold, M.; Couturier, Y.; Débarges, B.; Duong, S.; Goulet, S.; Grad, R.; Granikov, V.; Hudon, C.; Kremer, B.; Kroger, E.; Lebouché, B.; Loignon, C.; Lussier, M-T.; McLauchlin, L.R.; Martello, C.; Poitras, M-E.; Pluye, P.; Pratt, R.; Rosenberg, E.; Samson, I.; Senn, N.; Ventelou, B.; Tsujimoto, M.; Vedel, I.; Wensing, M. | 26       |
| Patient and partner engagement                | Bujold, M.; Bush, P.L.; Débarges, B.; Granikov, V.; Loignon, C.; Pluye, P.; Poitras, M-E.; Samson, I.                                                                                                                                                                                                                                                      | 8        |
| Populations in situations of vulnerability    | Couturier, Y.; Giguere, A.; Hudon, C.; Loignon, C.; Lebouché, B.; Kroger, E.; Rosenberg, E.; Tsujimoto, M.; Samson, I.; Ventelou, B.                                                                                                                                                                                                                       | 10       |
| Shared Decision Making                        | Bujold, M.; Légaré, F.; Haggerty, J.; Hudon, C.; Giguere, A.; Lussier, M-T.; Pluye, P.; Poitras, M-E.; Rosenberg, E.; Senn, N.; Wensing, M.                                                                                                                                                                                                                | 11       |
| Systematic mixed studies reviews              | Bujold, M.; Bush, P.L.; El Sherif, R.; Gore, G.; Kroger, E.; Lebouché, B.; Légaré, F.; Pluye, P.; Rihoux, B.; Rosenberg, E.; Tang, D.; Vedel, I.; Wensing, M.                                                                                                                                                                                              | 13       |
| Tool development and validation               | Bujold, M.; El Sherif, R.; Grad, R.; Giguere, A.; Lussier, M-T.; Légaré, F.; Li Tang, D.; Pluye, P.; Pratt, R.; Senn, N.; Wensing, M.                                                                                                                                                                                                                      | 11       |
| <b>PROFESSION</b>                             | <b>NAMES*</b>                                                                                                                                                                                                                                                                                                                                              | <b>N</b> |
| Biology                                       | Bujold, M.; Débarges, B.; Giguere, A.                                                                                                                                                                                                                                                                                                                      | 3        |
| Computer science                              | Tang, D.,                                                                                                                                                                                                                                                                                                                                                  | 1        |
| Epidemiology                                  | Haggerty, J.; El Sherif, R.; , Kröger, E.                                                                                                                                                                                                                                                                                                                  | 3        |
| Librarianship                                 | Gore, G.; Granikov, V.                                                                                                                                                                                                                                                                                                                                     | 2        |
| Medicine                                      | Bigras, M.; Beaulieu, M-C.; Beaulieu, M.D.; Goulet, S.; Grad, R.; Hersson, F.; Hudon, C.; Lebouché, B.; Légaré, F.; Lussier, M-T.; Martello, C.; McLauchlin, L.R.; Pluye, P.; Pratt, R.; Rosenberg, E.; Samson, I.; Senn, N.; Ventelou, B.; Wensing, M.                                                                                                    | 19       |
| Nursing                                       | Boulet, A.; Poitras, M-E.;                                                                                                                                                                                                                                                                                                                                 | 2        |
| Occupational/physical therapy                 | Bush, P.L.                                                                                                                                                                                                                                                                                                                                                 | 1        |
| Pharmacy                                      | Duong, S.; Kroger, E.                                                                                                                                                                                                                                                                                                                                      | 2        |
| Public health                                 | Légaré, F.; Loignon, C.; Pluye, P.; Vedel, I.; Wensing, M.                                                                                                                                                                                                                                                                                                 | 5        |
| Social work and social sciences               | Bujold, M.; Couturier, Y.; Gagnon, J.; Hudon, C.; Loignon, C.; Rihoux, B.                                                                                                                                                                                                                                                                                  | 6        |

\*Alphabetical order

**Table 2 – Search Strategy in Medline - Concept map (Concepts #1 and #2 and #3 and #4)**

| <b>CONCEPT #1 - PATIENTS WITH COMPLEX CARE NEEDS</b> |                                                                                                                                                                                                                                                                                                                                                                                                                                                                                                                                                                                                                                                                                                        |
|------------------------------------------------------|--------------------------------------------------------------------------------------------------------------------------------------------------------------------------------------------------------------------------------------------------------------------------------------------------------------------------------------------------------------------------------------------------------------------------------------------------------------------------------------------------------------------------------------------------------------------------------------------------------------------------------------------------------------------------------------------------------|
| 1                                                    | 1 (complex adj4 (problem* or issue* or patient? or need? or care or existence? or experience? or live? or realit* or journey? or situation?)).ti,ab,kf.                                                                                                                                                                                                                                                                                                                                                                                                                                                                                                                                                |
| 2                                                    | 2 complex case?.mp.                                                                                                                                                                                                                                                                                                                                                                                                                                                                                                                                                                                                                                                                                    |
| 3                                                    | 3 (complexity adj4 (clinical or patient? or science or theory)).mp.                                                                                                                                                                                                                                                                                                                                                                                                                                                                                                                                                                                                                                    |
| 4                                                    | 4 ((high-effort or burden or complicated or demanding) adj patient?).mp.                                                                                                                                                                                                                                                                                                                                                                                                                                                                                                                                                                                                                               |
| 5                                                    | 5 exp Vulnerable Populations/                                                                                                                                                                                                                                                                                                                                                                                                                                                                                                                                                                                                                                                                          |
| 6                                                    | 6 poverty/ or poverty areas/ or unemployment/ or homeless persons/ or homeless youth/ or exp *aged/ or frail elderly/ or exp "Emigrants and Immigrants"/ or minority groups/ or exp disabled persons/ or drug users/ or medically uninsured/ or refugees/ or exp culture/                                                                                                                                                                                                                                                                                                                                                                                                                              |
| 7                                                    | 7 (poverty or disadvantaged or underserved or under served or indigen* or tribe? or tribal or native? or aboriginal* or low income* or unemploy* or underemploy* or under employ* or homeless* or street people or street person? or (social* adj (isolat* or stigma*)) or inequalit* or uninsured or underinsured or unader insured or uneducated or low* educat* or poor* educat* or illitera* or (low adj2 litera*) or functional* impair* or disabled or disabilit* or handicap* or physical* challenge* or mental* challenge* or ((drug or substance) adj (abuse* or addict* or dependen* or habit? or "use*")) or minorit* or emigra* or immigra* or migra* or foreigner* or refugee*).ti,ab,kf. |
| 8                                                    | 8 (vulnerab* or aged or elderly or frail* or senior?).ti.                                                                                                                                                                                                                                                                                                                                                                                                                                                                                                                                                                                                                                              |
| 9                                                    | 9 ((frail* or vulnerab* or at risk or high risk or low function or dependent) adj2 (older or elder* or senior* or patient*).ti,ab,kf.                                                                                                                                                                                                                                                                                                                                                                                                                                                                                                                                                                  |
| 10                                                   | 10 (cald or (cultural* adj3 divers*) or multicultur* or intercultur* or (patient* adj cultur*) or (cultural* adj3 (background* or differen*)) or ethnocultural* or (cultural* adj (aware* or competen* or appropriate* or relevan* or safe* or train*))).ti,ab,kf.                                                                                                                                                                                                                                                                                                                                                                                                                                     |
| 11                                                   | 11 (vulnerab* adj (patient? or population? or social*).ti,ab,kf.                                                                                                                                                                                                                                                                                                                                                                                                                                                                                                                                                                                                                                       |
| 12                                                   | 12 sensitive population?.ti,ab,kf.                                                                                                                                                                                                                                                                                                                                                                                                                                                                                                                                                                                                                                                                     |
| 13                                                   | 13 ((Frequen* or high) adj2 (attend* or consult*).ti,ab,kf.                                                                                                                                                                                                                                                                                                                                                                                                                                                                                                                                                                                                                                            |
| 14                                                   | 14 ("frequent visit*" or "frequent flyer*" or "heavy user*" or "repeat use").ti,ab,kf.                                                                                                                                                                                                                                                                                                                                                                                                                                                                                                                                                                                                                 |
| 15                                                   | 15 (((frequen* or high) adj2 (user* or utili*)) or "high use" or "frequent use") adj3 (patient* or hospital* or emergency or ED or services)).ti,ab,kf.                                                                                                                                                                                                                                                                                                                                                                                                                                                                                                                                                |
| 16                                                   | 16 "revolving door".ti,ab,kf.                                                                                                                                                                                                                                                                                                                                                                                                                                                                                                                                                                                                                                                                          |
| 17                                                   | 17 "frequent hospitali#ation*".ti,ab,kf.                                                                                                                                                                                                                                                                                                                                                                                                                                                                                                                                                                                                                                                               |
| 18                                                   | 18 ((preventable or avoidable) adj2 (utili* or visit* or hospitali* or consultation*).ti,ab,kf.                                                                                                                                                                                                                                                                                                                                                                                                                                                                                                                                                                                                        |
| 19                                                   | 19 (high adj2 risk adj3 hospitali#ation*).ti,ab,kf.                                                                                                                                                                                                                                                                                                                                                                                                                                                                                                                                                                                                                                                    |
| 20                                                   | 20 ("frequent use*" or "frequent utilis*" or "high use*" or "high utili*").kf.                                                                                                                                                                                                                                                                                                                                                                                                                                                                                                                                                                                                                         |
| 21                                                   | 21 mental disorders/ or mental health/                                                                                                                                                                                                                                                                                                                                                                                                                                                                                                                                                                                                                                                                 |
| 22                                                   | 22 ((mental* or psychiatric) adj (health* or disorder* or disease* or ill*).ti.                                                                                                                                                                                                                                                                                                                                                                                                                                                                                                                                                                                                                        |
| 23                                                   | 23 comorbidity/                                                                                                                                                                                                                                                                                                                                                                                                                                                                                                                                                                                                                                                                                        |
| 24                                                   | 24 (comorbidit* or multi* morbidit* or multimorbidit*).ti,ab,kf.                                                                                                                                                                                                                                                                                                                                                                                                                                                                                                                                                                                                                                       |
| 25                                                   | 25 exp polypharmacy/                                                                                                                                                                                                                                                                                                                                                                                                                                                                                                                                                                                                                                                                                   |
| 26                                                   | 26 exp drug interactions/                                                                                                                                                                                                                                                                                                                                                                                                                                                                                                                                                                                                                                                                              |
| 27                                                   | 27 exp "Drug-Related Side Effects and Adverse Reactions"/                                                                                                                                                                                                                                                                                                                                                                                                                                                                                                                                                                                                                                              |
| 28                                                   | 28 (adverse adj (effect? or event? or reaction?)).ti.                                                                                                                                                                                                                                                                                                                                                                                                                                                                                                                                                                                                                                                  |
| 29                                                   | 29 ((multi* adj (therap* or treatment* or drug? or medication?)) or polypharmac*).ti,ab,kf.                                                                                                                                                                                                                                                                                                                                                                                                                                                                                                                                                                                                            |
| 30                                                   | 30 drug* interact*.ti,ab,kf.                                                                                                                                                                                                                                                                                                                                                                                                                                                                                                                                                                                                                                                                           |
| 31                                                   | 31 exp complementary therapies/                                                                                                                                                                                                                                                                                                                                                                                                                                                                                                                                                                                                                                                                        |

|                                                                                                                                                                                                                                                        |
|--------------------------------------------------------------------------------------------------------------------------------------------------------------------------------------------------------------------------------------------------------|
| 32 exp herbal medicine/                                                                                                                                                                                                                                |
| 33 ((alternative* or complementar* or folk* or herbal or integrat* or natural or non-prescription or over the counter or traditional) adj2 (health* or medication* or medicine* or product* or remedy or remedies or therap* or treatment*)).ti,ab,kf. |
| 34 or/1-33                                                                                                                                                                                                                                             |

1

|                                                                                                                                                                                                                                                                                                                                                                                                                                                                                                                                                                                          |
|------------------------------------------------------------------------------------------------------------------------------------------------------------------------------------------------------------------------------------------------------------------------------------------------------------------------------------------------------------------------------------------------------------------------------------------------------------------------------------------------------------------------------------------------------------------------------------------|
| <b>CONCEPT #2 - PRIMARY HEALTH CARE</b>                                                                                                                                                                                                                                                                                                                                                                                                                                                                                                                                                  |
| 35 exp Primary Health Care/                                                                                                                                                                                                                                                                                                                                                                                                                                                                                                                                                              |
| 36 exp Primary Care Nursing/                                                                                                                                                                                                                                                                                                                                                                                                                                                                                                                                                             |
| 37 exp General Practice/                                                                                                                                                                                                                                                                                                                                                                                                                                                                                                                                                                 |
| 38 Community Health Services/                                                                                                                                                                                                                                                                                                                                                                                                                                                                                                                                                            |
| 39 exp Community Pharmacy Services/                                                                                                                                                                                                                                                                                                                                                                                                                                                                                                                                                      |
| 40 Community Mental Health Services/                                                                                                                                                                                                                                                                                                                                                                                                                                                                                                                                                     |
| 41 Community Health Nursing/                                                                                                                                                                                                                                                                                                                                                                                                                                                                                                                                                             |
| 42 Social Work/                                                                                                                                                                                                                                                                                                                                                                                                                                                                                                                                                                          |
| 43 General Practitioners/                                                                                                                                                                                                                                                                                                                                                                                                                                                                                                                                                                |
| 44 Physicians, Family/                                                                                                                                                                                                                                                                                                                                                                                                                                                                                                                                                                   |
| 45 Physicians, Primary Care/                                                                                                                                                                                                                                                                                                                                                                                                                                                                                                                                                             |
| 46 Social Workers/                                                                                                                                                                                                                                                                                                                                                                                                                                                                                                                                                                       |
| 47 (primary care or primary health care or primary healthcare or community nursing or family practice or general practice or family medicine or family physician* or family practitioner* or family doctor* or general physician* or general practitioner* or community based medicine or community mental health service* or community mental health nursing or community health nursing or community health service* or community pharmacist* or primary practice or primary practitioner* or psychologist* or social service* or social work* or (communit\$3 adj5 nurse?)).ti,ab,kf. |
| 48 or/35-47                                                                                                                                                                                                                                                                                                                                                                                                                                                                                                                                                                              |

2

|                                                                                                                                                                                                                                                                                                                                                                                                                                                                                                                                                         |
|---------------------------------------------------------------------------------------------------------------------------------------------------------------------------------------------------------------------------------------------------------------------------------------------------------------------------------------------------------------------------------------------------------------------------------------------------------------------------------------------------------------------------------------------------------|
| <b>CONCEPT #3 - INTERPERSONAL RELATIONS</b>                                                                                                                                                                                                                                                                                                                                                                                                                                                                                                             |
| 49 exp Interpersonal Relations/                                                                                                                                                                                                                                                                                                                                                                                                                                                                                                                         |
| 50 exp patient care team/                                                                                                                                                                                                                                                                                                                                                                                                                                                                                                                               |
| 51 (exp nurses/ or exp physicians/ or pharmacists/ or social workers/ or (nurse* or pharmacist* or physician* or psychologist* or social worker* or clinician* or doctor* or practitioner* or gps or health care professional* or healthcare professional* or health care provider* or healthcare provider* or ((primary care or primary healthcare or primary health care) adj provider*) or resident*).ti.) and (exp patients/ or caregivers/ or exp Family/ or (patient* or consumer* or people* or carer? or caregiver? or family or families).ti.) |
| 52 exp consumer participation/ or ((patient* or consumer*) adj6 (interaction* or empower* or engagement* or involvement* or involving* or participation* or participating*)).ti,ab,kf.                                                                                                                                                                                                                                                                                                                                                                  |
| 53 (exp patients/ or (patient* or inpatient* or outpatient* or hospitali#ed or institutionali#ed or consumer* or people*).ti.) and (caregivers/ or exp Family/ or (carer* or caregiver* or family or families).ti.)                                                                                                                                                                                                                                                                                                                                     |
| 54 (collaborat* or team*).ti,ab,kf.                                                                                                                                                                                                                                                                                                                                                                                                                                                                                                                     |
| 55 (interprofessional* or inter professional* or interdisciplinary* or inter disciplin* or interoccupation* or inter occupation* or multiprofessional* or multi professional* or multidisciplin* or multi disciplin* or multioccupation* or multi occupation*).ti,ab,kf.                                                                                                                                                                                                                                                                                |
| 56 (interpersonal* or shared care).ti,ab,kf.                                                                                                                                                                                                                                                                                                                                                                                                                                                                                                            |
| 57 or/49-56                                                                                                                                                                                                                                                                                                                                                                                                                                                                                                                                             |

3

|                                                                       |
|-----------------------------------------------------------------------|
| <b>CONCEPT #4 - DECISIONAL NEEDS</b>                                  |
| 58 (decision* or decided or decides or deciding or choice*).ti,ab,kf. |

|    |                                                                                                                                                                                                                                                                                                                                                 |
|----|-------------------------------------------------------------------------------------------------------------------------------------------------------------------------------------------------------------------------------------------------------------------------------------------------------------------------------------------------|
| 59 | exp decision making/ or informed consent/ or exp problem solving/ or (exp patient preference/ and patient education as topic/)                                                                                                                                                                                                                  |
| 60 | ((patient* adj3 (voice* or perspective*)) or preference* or deliberation* or navigat* or accommodation* or accord? or agree* or arrangement or compromise or conciliation or counterbalance or counterpoise or equipoise or mediation or negotia* or poise or prioritization or prioritization* or prioritization* or reconciliation).ti,ab,kf. |
| 61 | (regret* or blame* or uncertain* or disagreement or disconcerted or faithless or dissension or dissent* or distrust* or indecision or indecisive or refusal or trustless or undecided or untrustworthy or untrusting or mistrust*).ti,ab,kf.                                                                                                    |
| 62 | or/58-61                                                                                                                                                                                                                                                                                                                                        |
| 63 | 34 and 48 and 57 and 62                                                                                                                                                                                                                                                                                                                         |
| 64 | Limit 63 to (English or French or Spanish)                                                                                                                                                                                                                                                                                                      |

**Figure 1 legend.** The Interprofessional Shared Decision Making (IP-SDM) model was designed to broaden the perspective of shared decision making (SDM) beyond the patient-practitioner dyad and include interprofessional (IP) teams. For more details on the IP-SDM model, please consult the following website:

<http://www.decision.chaire.fmed.ulaval.ca/en/research/projects/interprofessional-approaches/>

**REFERENCES**

1. Grant RW, Ashburner JM, Hong CS, et al. Defining patient complexity from the primary care physician's perspective: A cohort study. *Ann Intern Med* 2011;155(12):797-804.
2. Katerndahl DA, Wood R, Jaen CR. A method for estimating relative complexity of ambulatory care. *Ann Fam Med* 2010;8(4):341-47.
3. Shi L. The impact of primary care: A focused review. *Scientifica* 2012;2012.
4. Schaink AK, Kuluski K, Lyons RF, et al. A scoping review and thematic classification of patient complexity: Offering a unifying framework. *Journal of Comorbidity* 2012;2(1):1-9.
5. Smith S, Soubhi H, Fortin M, et al. Managing patients with multimorbidity: systematic review of interventions in primary care and community settings. *BMJ* 2012; 345(e5205).
6. Loeb DF, Bayliss EA, Binswanger IA, et al. Primary care physician perceptions on caring for complex patients with medical and mental illness. *J Gen Intern Med* 2012;27(8):945-52.
7. Safford MM, Allison JJ, Kiefe CI. Patient complexity: More than comorbidity. The vector model of complexity. *J Gen Intern Med* 2007;22(Suppl 3):382-90.
8. Johnson DR, Ziersch AM, Burgess T. I don't think general practice should be the front line: Experiences of general practitioners working with refugees in South Australia. *Australia and New Zealand health policy* 2008;5.
9. Martello C, Bessière G, Bigras M, et al. What Do We Mean When We Say "This Patient is Complex"? . NAPCRG Annual Conference (North American Primary Care Research Group). New York, 2014.
10. Pluye P, Bessière G, Bigras M, et al. Characteristics of Complex Care Needs and Interventions Suited for Patients With Such Needs: A Participatory Scoping Review. NAPCRG Annual Conference (North American Primary Care Research Group). New York, 2014.
11. Laerum E, Steine S, Finset A. The Patient Perspective Survey (PPS): A new tool to improve consultation outcome and patient involvement in general practice patients with complex health problems. *Patient Educ Couns* 2004;52(2):201-07.
12. Peek CJ. Integrating care for persons, not only diseases. *J Clin Psychol Med Settings* 2009;16(1):13-20.
13. Stiefel FC, Huyse FJ, Söllner W, et al. Operationalizing integrated care on a clinical level: The INTERMED project. *Med Clin North Am* 2006;90(4):713-58.
14. Fried TR, Tinetti M, Agostini J, et al. Health outcome prioritization to elicit preferences of older persons with multiple health conditions. *Patient Educ Couns* 2011;83(2):278-82.
15. Mangin D, Stephen G, Bismah V, et al. Making patient values visible in healthcare: a systematic review of tools to assess patient treatment priorities and preferences in the context of multimorbidity. *BMJ Open* 2016;6(6):e010903.
16. St-Jacques S, Grenier S, Charland M, et al. Decisional needs assessment regarding Down syndrome prenatal testing: a systematic review of the perceptions of women, their partners and health professionals. *Prenat Diagn* 2008;28(13):1183-203.
17. Weston WW. Informed and shared decision-making: the crux of patient-centered care. *CMAJ* 2001;165(4):438-9.



18. Makoul G, Clayman ML. An integrative model of shared decision making in medical encounters. *Patient Educ Couns* 2006;60(3):301-12.
19. Legare F, Ratté S, Stacey D, et al. Interventions for improving the adoption of shared decision making by healthcare professionals. *Cochrane Database Syst Rev* 2010(5):CD006732.
20. Legare F, Stacey D, Turcotte S, et al. Interventions for improving the adoption of shared decision making by healthcare professionals. *Cochrane Database Syst Rev* 2014(9):CD006732.
21. Légaré F, Witteman H. Shared decision making: Examining key elements and barriers to adoption into routine clinical practice. *Health affairs (Project Hope)* 2013;32(2):276-84.
22. Melbourne E, Roberts S, Durand MA, et al. Dyadic OPTION: Measuring perceptions of shared decision-making in practice. *Patient Educ Couns* 2011;83(1):55-7.
23. Shared Decision Making: Australian Commission on Safety and Quality in Health Care; 2017 [Available from: <https://www.safetyandquality.gov.au/our-work/shared-decision-making/> accessed 2 Feb 2017.
24. Shared Decision Making: National health service (NHS); 2016 [Available from: <http://sdm.rightcare.nhs.uk/> accessed 2 Feb 2017.
25. The SHARE Approach: Agency for Healthcare Research and Quality (AHRQ); 2016 [Available from: <https://www.ahrq.gov/professionals/education/curriculum-tools/shareddecisionmaking/index.html> accessed 2 Feb 2017.
26. Bujold M. Patient's representation of illness as an interdisciplinary communication channel [Article in French]. *Anthropologie et Sociétés* 2008;32( HS):18-25.
27. Bujold M. Le patient intégrateur: analyse de l'articulation d'une pluralité de voix / voies dans une clinique intégrative québécoise. Université Laval, 2011.
28. Bujold M. Ethnomedical ethics with regard to patient plurivocality: between autonomy and heteronomy [Article in French]. *Journal International de Bioéthique* 2015;26(4):19-36.
29. Gaboury I, Bujold M, Boon H, et al. Interprofessional collaboration within Canadian integrative healthcare clinics: Key components. *Soc Sci Med* 2009;69(5):707-15.
30. Legare F, Stacey D, Pouliot S, et al. Interprofessionalism and shared decision-making in primary care: A stepwise approach towards a new model. *J Interprof Care* 2011;25(1):18-25.
31. Legare F, Stacey D, Graham ID, et al. Advancing theories, models and measurement for an interprofessional approach to shared decision making in primary care: a study protocol. *BMC Health Serv Res* 2008;8:2.
32. Interprofessional Approaches to Shared Decision Making (IP-SDM) 2017 [Available from: <http://www.decision.chaire.fmed.ulaval.ca/en/research/projects/interprofessional-approaches/> accessed 2017-06-1.
33. Legare F, Briere N, Stacey D, et al. Implementing shared decision-making in interprofessional home care teams (the IP-SDM-SW study): protocol for a stepped wedge cluster randomised trial. *BMJ open* 2016;6(11):e014023.
34. Legare F, Stacey D, Briere N, et al. Healthcare providers' intentions to engage in an interprofessional approach to shared decision-making in home care programs: a mixed methods study. *J Interprof Care* 2013;27(3):214-22.

- 1  
2  
3 1 35. Muntinga ME, Hoogendijk EO, van Leeuwen KM, et al. Implementing the chronic care  
4 2 model for frail older adults in the Netherlands: study protocol of ACT (frail older  
5 3 adults: care in transition). *BMC Geriatr* 2012;12:19.  
6 4  
7 4 36. Légaré F, O'Connor A, Graham I, et al. Supporting patients facing difficult health care  
8 5 decisions: use of the Ottawa Decision Support Framework. *Canadian Family*  
9 6 *Physician* 2006;52(4):476-77.  
10 7  
11 7 37. OHRI. Ottawa Decision Support Framework 2015 [Available from:  
12 8 <https://decisionaid.ohri.ca/odsf.html> accessed June 27 2017.  
13 9  
14 9 38. Jacobsen MJ, O'Connor AM, Stacey D. Decisional Needs Assessment in Populations. A  
15 10 workbook for assessing patients' and practitioners' decision making needs.  
16 11 University of Ottawa 1999 [updated 2013] [Available from:  
17 12 <https://decisionaid.ohri.ca/docs/implement/PopulationNeeds.pdf> accessed Feb 2  
18 13 2017.  
19 14  
20 14 39. Straus SE, Tetroe J, Graham I. Defining knowledge translation. *Canadian Medical*  
21 15 *Association Journal* 2009;181(3-4):165-68.  
22 16  
23 16 40. Pluye P, Hong QN. Combining the power of stories and the power of numbers: Mixed  
24 17 methods research and mixed studies reviews. *Annu Rev Public Health* 2014;35:29-  
25 18 45.  
26 19  
27 19 41. Grant M, Booth A. A typology of reviews: An analysis of 14 review types and associated  
28 20 methodologies. *Health Info Libr J* 2009;26(2):91-108.  
29 21  
30 21 42. Pluye P, Gagnon MP, Griffiths F, et al. A scoring system for appraising mixed methods  
31 22 research, and concomitantly appraising qualitative, quantitative and mixed methods  
32 23 primary studies in mixed studies reviews. *Int J Nurs Stud* 2009;46(4):529-46.  
33 24  
34 24 43. Pope C, Mays N, Popay J. Synthesizing qualitative and quantitative health evidence: A  
35 25 guide to methods. Berkshire: Open University Press 2007.  
36 26  
37 26 44. Sheldon TA. Making evidence synthesis more useful for management and policy-making.  
38 27 *J Health Serv Res Policy* 2005;10(3 Suppl. 1):1-5.  
39 28  
40 28 45. Pluye P, Hong Q, I. V. The plurality of review methods and synthesis methods: Opening-  
41 29 up the definition of systematic reviews [invited peer-reviewed paper on knowledge  
42 30 syntheses]. *J Clin Epi* In Press.  
43 31  
44 31 46. Hong QN, Pluye P, Bujold M, et al. Convergent and sequential synthesis designs:  
45 32 implications for conducting and reporting systematic reviews of qualitative and  
46 33 quantitative evidence. *Systematic Reviews* (Accepted).  
47 34  
48 34 47. What are the key processes associated to outcomes of participatory research with  
49 35 health organizations? A participatory systematic mixed studies review. NAPCRG  
50 36 annual meeting (North American Primary Care Research Group); 2013 Ottawa.  
51 37  
52 37 48. Pluye P, Nadeau N, Lehoux P. Comment favoriser la recherche clinique en  
53 38 pédopsychiatrie? Une expérience de recherche-action collaborative. *Sante Mentale*  
54 39 *Quebec* 2001;26(12):245-66.  
55 40  
56 40 49. Cargo M, Mercer S. The value and challenges of participatory research: Strengthening its  
57 41 practice. *Annu Rev Public Health* 2008;29(1):325-50.  
58 42  
59 42 50. Waterman H, Tillen D, Dickson R, et al. Action Research: A systematic review and  
60 43 guidance for assessment. *Health Technol Assess* 2001;5(23):iii-157.  
44  
45 51. Argyris C, Putnam R, Smith D. Action science : Concepts, methods, and skills for research  
and intervention. San Francisco, CA: Jossey-Bass 1985.

- 1 52. Munn-Giddings C, McVicar A, Smith L. Systematic review of the uptake and design of  
2 action research in published nursing research, 2000-2005. *J Res Nurs*  
3 2008;13(6):465-77.
- 4 53. Munten G, Van Den Bogaard J, Cox K, et al. Implementation of evidence-based practice in  
5 nursing using action research: A review. *Worldviews Evid Based Nurs* 2010;7(3):135-  
6 57.
- 7 54. Soh K, Davidson P, Leslie G, et al. Action research studies in the intensive care setting: A  
8 systematic review. *Int J Nurs Stud* 2011;48(2):258-68.
- 9 55. Davis MM, Keller S, DeVoe J, et al. Characteristics and lessons learned from practice-  
10 based research networks (PBRNs) in the United States. *J Healthc Leadersh*  
11 2012;2012(4):107-16.
- 12 56. Garson DG. Reliability analysis. Statnotes: Topics in multivariate analysis. In: Garson DG,  
13 ed. Raleigh: North Carolina State University, 2010.
- 14 57. Landis JR, Koch GG. The measurement of observer agreement for categorical data.  
15 *Biometrics* 1977;33(1):159-74.
- 16 58. Higgins J, Green S. Cochrane handbook for systematic reviews of interventions Version  
17 5.1.0 [updated March 2011]: The Cochrane Collaboration; 2011 [Available from:  
18 <http://www.cochrane-handbook.org> accessed Mar 1 2013.
- 19 59. Pace R, Pluye P, Bartlett G, et al. Testing the reliability and efficiency of the pilot Mixed  
20 Methods Appraisal Tool (MMAT) for systematic mixed studies review. *Int J Nurs Stud*  
21 2012;49(1):47-53.
- 22 60. Souto RQ, Khanassov V, Hong QN, et al. Systematic mixed studies reviews: Updating  
23 results on the reliability and efficiency of the mixed methods appraisal tool.  
24 *International journal of nursing studies* 2015;52:500-01.
- 25 61. Crowe M, Sheppard L. A review of critical appraisal tools show they lack rigor:  
26 Alternative tool structure is proposed. *J Clin Epidemiol* 2011;64(1):79-89.
- 27 62. Pluye P, Robert E, Cargo M, et al. Proposal: A mixed methods appraisal tool for  
28 systematic mixed studies reviews Department of Family Medicine, McGill University,  
29 Montreal, Canada.2011 [Available from:  
30 <http://mixedmethodsappraisaltoolpublic.pbworks.com>. Archived by WebCite® at  
31 <http://www.webcitation.org/5tTRTc9yI> accessed Feb 2 2017.
- 32 63. Popay J, Roberts H, Sowden A, et al. Guidance on the conduct of narrative synthesis in  
33 systematic reviews: Final report. Swindon: ESRC Methods Programme 2006.
- 34 64. Creswell J, Plano Clark V. Designing and conducting mixed methods research. Thousand  
35 Oaks: Sage 2010.
- 36 65. Bazeley P, Jackson K. Qualitative Data Analysis with NVivo: Colorado and University of  
37 Colorado: SAGE Publications Ltd 2013.
- 38 66. Bujold M. Nvivo: a support tool for qualitative analysis. Workshop guide. Montreal,  
39 Canada: CAQI 2016.
- 40 67. Boyatzis RE. Transforming qualitative information: Thematic analysis and code  
41 development. Thousand Oaks: Sage 1998.
- 42 68. Fereday J, Muir-Cochrane E. Demonstrating rigor using thematic analysis: A hybrid  
43 approach of inductive and deductive coding and theme development. *Int J Qual*  
44 *Methods* 2006; 5(1).
- 45 69. Sullivan P. Qualitative data analysis using a dialogical approach. London: Sage 2012.

- 1  
2  
3 1 70. Pavel S, Nolet D. Handbook of terminology. Ottawa: Minister of Public Works and  
4 2 Government Services Canada, 2001.  
5 3  
6 3 71. Rihoux B, Marx A. QCA, 25 years after “The Comparative Method”: Mapping, challenges,  
7 4 and innovations. *Polit Res Q* 2013;66(1):167-235.  
8 5 72. Rihoux B, Ragin C. Configurational comparative methods. Thousand Oaks: Sage 2009.  
9 6  
10 6 73. Cochrane Effective Practice and Organisation of Care Review Group. Data collection  
11 7 checklist Ottawa, Canada: Cochrane Effective Practice and Organisation of Care  
12 8 Review Group; 2002 [Available from:  
13 9 <http://epoc.cochrane.org/sites/epoc.cochrane.org/files/uploads/datacollectionchecklist.pdf> accessed Feb 10 2017.  
14 10  
15 11 74. Neuendorf KA. The content analysis guidebook. Thousand Oaks: Sage 2002.  
16 12  
17 12 75. Rich E, Lipson D, Libersky J, et al. Coordinating care for adults with complex care needs  
18 13 in the patient-centered medical home: Challenges and solutions [White Paper].  
19 14 Rockville, MD: U.S. Department of Health and Human Services Agency for Healthcare  
20 15 Research and Quality; 2012 [updated 2012; cited 2013 Dec 12]. Available from:  
21 16 <http://pcmh.ahrq.gov/sites/default/files/attachments/Coordinating%20Care%20for%20Adults%20with%20Complex%20Care%20Needs.pdf> accessed Feb 10 2017.  
22 17  
23 17 76. Rich EC, Lipson D, Libersky J, et al. Organizing care for complex patients in the patient-  
24 18 centered medical home. *Ann Fam Med* 2012;10(1):60-62.  
25 19  
26 20 77. Schoen C, Osborn R, Squires D, et al. New 2011 survey of patients with complex care  
27 21 needs in 11 countries finds that care is often poorly coordinated. *Health Aff*  
28 22 2011;30(12):2437-48.  
29 23  
30 23 78. Hudon C, Chouinard M-C, Couture M, et al. Partners for the optimal organisation of the  
31 24 healthcare continuum for high users of health and social services: protocol of a  
32 25 developmental evaluation case study design. *BMJ open* 2014;4(12):e006991.  
33 26  
34 26 79. Coiera E. When conversation is better than computation. *Journal of the American*  
35 27 *Medical Informatics Association* 2000;7(3):277-86.  
36 28  
37 28 80. Beaulieu MD, Proulx M, Jobin G, et al. When is knowledge ripe for primary care? An  
38 29 exploratory study on the meaning of evidence. *Eval Health Prof* 2008;31(1):22-42.  
39 30  
40 30 81. de Bruin S, Versnel N, Lemmens L, et al. Comprehensive care programs for patients with  
41 31 multiple chronic conditions: A systematic literature review. *Health Policy*  
42 32 2012;107(2-3):108-45.  
43 33  
44 33 82. Kamerow D. How can we treat multiple chronic conditions? *BMJ* 2012;344(e1487).  
45 34  
46 34 83. Ouwens M, Wollersheim H, Hermens R, et al. Integrated care programmes for  
47 35 chronically ill patients: A review of systematic reviews. *Int J Qual Health Care*  
48 36 2005;17(2):141-46.  
49 37  
50 37 84. Upshur R, Tracy C. Chronicity and complexity: Facing the challenges of chronic disease  
51 38 in primary care. *Can Fam Physician* 2008;54(12):1655-8.  
52 39  
53 39 85. Stacey D, Legare F, Col NF, et al. Decision aids for people facing health treatment or  
54 40 screening decisions. *Cochrane Database Syst Rev* 2014(1):CD001431.  
55 41  
56 41 86. Starfield B, Shi L, Macinko J. Contribution of primary care to health systems and health.  
57 42 *Milbank Q* 2005;83(3):457-502.  
58 43  
59 43 87. Stacey D, Légaré F, Col N, et al. Decision aids for people facing health treatment or  
60 44 screening decisions. *The Cochrane Library* 2014.  
45 88. Ministère de la santé et des services sociaux du Québec. Plan stratégique 2015-2020:  
46 Québec: Gouvernement du Québec; 2015 [Available from:

1  
2  
3  
4  
5  
6  
7  
8  
9  
10  
11  
12  
13  
14  
15  
16  
17  
18  
19  
20  
21  
22  
23  
24  
25  
26  
27  
28  
29  
30  
31  
32  
33  
34  
35  
36  
37  
38  
39  
40  
41  
42  
43  
44  
45  
46  
47  
48  
49  
50  
51  
52  
53  
54  
55  
56  
57  
58  
59  
60

1            <http://publications.msss.gouv.qc.ca/msss/fichiers/2016/16-717-01W.pdf> accessed  
2            06 June 2017.

For peer review only

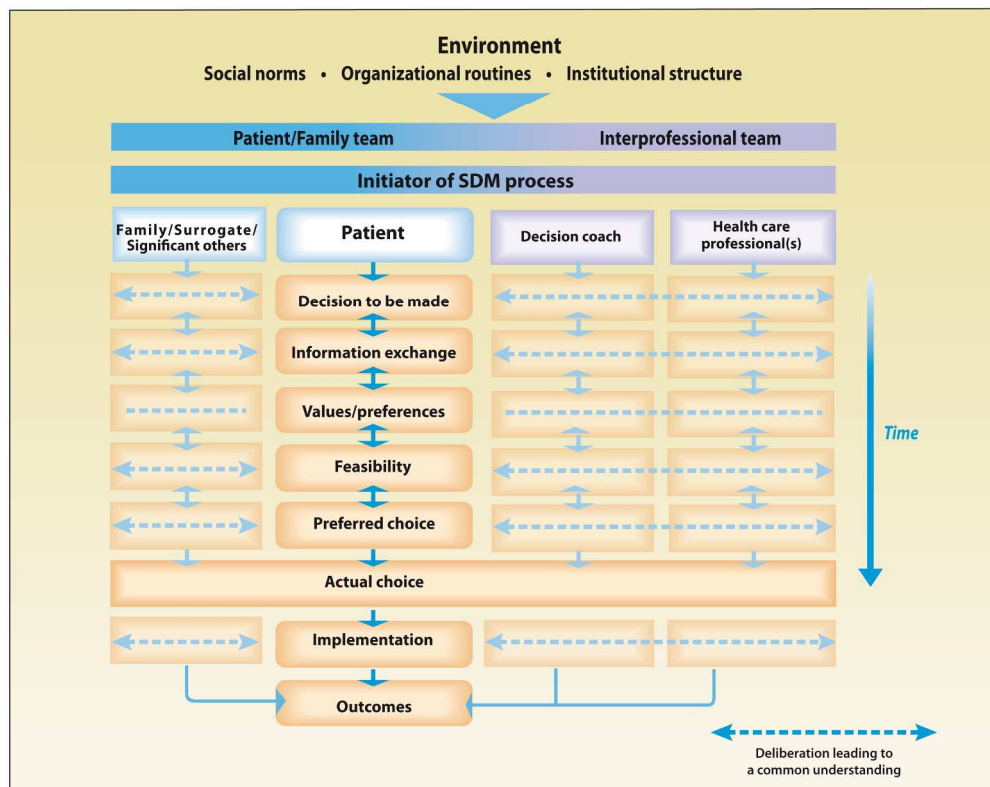

The Interprofessional Shared Decision Making (IP-SDM) model was designed to broaden the perspective of shared decision making (SDM) beyond the patient-practitioner dyad and include interprofessional (IP) teams. For more details on the IP-SDM model, please consult the following website: <http://www.decision.chaire.fmed.ulaval.ca/en/research/projects/interprofessional-approaches/>

231x182mm (300 x 300 DPI)

only

| Checklist | Page / Line<br>(Main document)             | Section and topic                 | Item<br>No | Checklist item ( <a href="http://www.bmj.com/content/349/bmj.g7647">http://www.bmj.com/content/349/bmj.g7647</a> )                                                                                                            |
|-----------|--------------------------------------------|-----------------------------------|------------|-------------------------------------------------------------------------------------------------------------------------------------------------------------------------------------------------------------------------------|
|           |                                            | <b>Administrative information</b> |            |                                                                                                                                                                                                                               |
|           |                                            | Title:                            |            |                                                                                                                                                                                                                               |
| ✓         | Page 1 - Line 2                            | Identification                    | 1a         | Identify the report as a protocol of a systematic review                                                                                                                                                                      |
| n/a       |                                            | Update                            | 1b         | If the protocol is for an update of a previous systematic review, identify as such                                                                                                                                            |
| ✓         | Page 3 - Lines 10-11                       | Registration                      | 2          | If registered, provide the name of the registry (such as PROSPERO) and registration number                                                                                                                                    |
|           |                                            | Authors:                          |            |                                                                                                                                                                                                                               |
| ✓         | Page 1 - Lines 4-30<br>Page 2 - Lines 1-8  | Contact                           | 3a         | Provide name, institutional affiliation, e-mail address of all protocol authors; provide physical mailing address of corresponding author                                                                                     |
| ✓         | Page 15 - Lines 9-22                       | Contributions                     | 3b         | Describe contributions of protocol authors and identify the guarantor of the review                                                                                                                                           |
| n/a       |                                            | Amendments                        | 4          | If the protocol represents an amendment of a previously completed or published protocol, identify as such and list changes; otherwise, state plan for documenting important protocol amendments                               |
|           |                                            | Support:                          |            |                                                                                                                                                                                                                               |
| ✓         | Page 15, lines 2-3 and<br>25-27            | Sources                           | 5a         | Indicate sources of financial or other support for the review                                                                                                                                                                 |
| ✓         | Page 15, lines 2-3                         | Sponsor                           | 5b         | Provide name for the review funder and/or sponsor                                                                                                                                                                             |
| ✓         | Page 15, lines 25-27                       | Role of sponsor or funder         | 5c         | Describe roles of funder(s), sponsor(s), and/or institution(s), if any, in developing the protocol                                                                                                                            |
|           |                                            | <b>Introduction</b>               |            |                                                                                                                                                                                                                               |
| ✓         | Page 4, lines 3-31 to<br>page 5, lines 1-2 | Rationale                         | 6          | Describe the rationale for the review in the context of what is already known                                                                                                                                                 |
| ✓         | Page 6, lines 29-32<br>Page 7, lines 1-5   | Objectives                        | 7          | Provide an explicit statement of the question(s) the review will address with reference to participants, interventions, comparators, and outcomes (PICO)                                                                      |
|           |                                            | <b>Methods</b>                    |            |                                                                                                                                                                                                                               |
| ✓         | Page 8, lines 13-28                        | Eligibility criteria              | 8          | Specify the study characteristics (such as PICO, study design, setting, time frame) and report characteristics (such as years considered, language, publication status) to be used as criteria for eligibility for the review |
| ✓         | Page 8, lines 1-11                         | Information sources               | 9          | Describe all intended information sources (such as electronic databases, contact with study authors, trial registers or other grey literature sources) with planned dates of coverage                                         |

|     |                                                                                           |                                    |     |                                                                                                                                                                                                                                                  |
|-----|-------------------------------------------------------------------------------------------|------------------------------------|-----|--------------------------------------------------------------------------------------------------------------------------------------------------------------------------------------------------------------------------------------------------|
| ✓   | Page 8, lines 1-31 and<br>page 9, lines 1-10<br>page 17, Table 2                          | Search strategy                    | 10  | Present draft of search strategy to be used for at least one electronic database, including planned limits, such that it could be repeated                                                                                                       |
|     |                                                                                           | Study records:                     |     |                                                                                                                                                                                                                                                  |
| ✓   | Page 8, lines 30-31 and<br>page 9, lines 1-4                                              | Data management                    | 11a | Describe the mechanism(s) that will be used to manage records and data throughout the review                                                                                                                                                     |
| ✓   | Page 9, lines 1-19                                                                        | Selection process                  | 11b | State the process that will be used for selecting studies (such as two independent reviewers) through each phase of the review (that is, screening, eligibility and inclusion in meta-analysis)                                                  |
| ✓   | page 10, lines 1-9                                                                        | Data collection process            | 11c | Describe planned method of extracting data from reports (such as piloting forms, done independently, in duplicate), any processes for obtaining and confirming data from investigators                                                           |
| ✓   | Page 10, lines 27-31                                                                      | Data items                         | 12  | List and define all variables for which data will be sought (such as PICO items, funding sources), any pre-planned data assumptions and simplifications                                                                                          |
| ✓   | Page 11, lines 2-7<br>Page 11, lines 29-31<br>Page 12, lines 1-5                          | Outcomes and prioritization        | 13  | List and define all outcomes for which data will be sought, including prioritization of main and additional outcomes, with rationale.                                                                                                            |
| ✓   | Page 9, 12-19                                                                             | Risk of bias in individual studies | 14  | Describe anticipated methods for assessing risk of bias of individual studies, including whether this will be done at the outcome or study level, or both; state how this information will be used in data synthesis                             |
| ✓   | Page 9, lines 21-23<br>Page 11, lines 19-27<br>Page 11, lines 29-31<br>Page 12, lines 1-5 | Data synthesis                     | 15a | Describe criteria under which study data will be quantitatively synthesised                                                                                                                                                                      |
| n/a |                                                                                           |                                    | 15b | If data are appropriate for quantitative synthesis, describe planned summary measures, methods of handling data and methods of combining data from studies, including any planned exploration of consistency (such as $I^2$ , Kendall's $\tau$ ) |
| n/a |                                                                                           |                                    | 15c | Describe any proposed additional analyses (such as sensitivity or subgroup analyses, meta-regression)                                                                                                                                            |
| ✓   | Page 10, line 18-26                                                                       |                                    | 15d | If quantitative synthesis is not appropriate, describe the type of summary planned                                                                                                                                                               |
| n/a |                                                                                           | Meta-bias(es)                      | 16  | Specify any planned assessment of meta-bias(es) (such as publication bias across studies, selective reporting within studies)                                                                                                                    |
| ✓   | Page 9, lines 12-19                                                                       | Confidence in cumulative evidence  | 17  | Describe how the strength of the body of evidence will be assessed (such as GRADE)                                                                                                                                                               |
